# Supplementary material
Source: publisher figshare collection journal article supplement (https://diabetesjournals.figshare.com/articles/dataset/_/25731687)
Supplement: Supplementary file 1 [file 1]

## Sheet: Supplemental Table 7
Supplemental Table 7. Association of Known Diabetes Mellitus (DM) Loci with Bile Acid (BA) Levels in the GeneBank Cohort.
Known loci were those associated with DM at the genome-wide significance threshold based on a BMI-unadjusted analysis, as described by Mahajan et al1.
RAF, DM risk allele frequency.
Betas refer to effect size of DM risk allele on plasma levels of indicated BA.
Orange shading indicates loci yielding P-values <0.05.
N/A, not available
Reference:
1. Mahajan, A., et al., Multi-ancestry genetic study of type 2 diabetes highlights the power of diverse populations for discovery and translation. Nat Genet, 2022. 54(5): p. 560-572.
										Deoxycholic acid			Lithocholenic acid			Taurodeoxycholic acid			12-Ketolithocholic acid			23-Nordeoxycholic acid			Glycodeoxycholic acid			7-Ketolithocholic acid			Hyocholic acid			Taurohyocholic acid			Glycohyocholic acid			6-Ketolithocholic acid			Hyodeoxycholic acid			Isolithocholic acid			Taurohyodeoxycholic acid
Chr	BP (Build 37)	Lead DM SNP	Nearest gene	Risk allele	Other allele	RAF	OR (95% CI) for DM	Fixed Effects P-value	MR_MEGA_P-value	BETA	SE	P	BETA	SE	P	BETA	SE	P	BETA	SE	P	BETA	SE	P	BETA	SE	P	BETA	SE	P	BETA	SE	P	BETA	SE	P	BETA	SE	P	BETA	SE	P	BETA	SE	P	BETA	SE	P	BETA
1	20729451	rs10916784	VWA5B1	G	C	0.591	1.03 (1.02-1.05)	3.1e-11	1.2e-11	0.0133228	0.032872	0.68531	0.141231	0.270898	0.602128	0.0765871	0.0328494	0.0198369	0.0285878	0.0748037	0.702337	0.0750102	0.108169	0.488022	0.0694831	0.0326111	0.0332503	-0.0319406	0.0330984	0.334663	-0.0289664	0.0681205	0.670707	0.032921	0.0921653	0.720946	0.0332631	0.0669623	0.619364	0.464586	0.373962	0.214113	0.410383	0.246808	0.0963597	0.0583041	0.0727294	0.422754	0.0333252
1	39870793	rs3768301	MACF1	T	C	0.218	1.07 (1.06-1.08)	2.5e-28	6.2e-31	-0.0570835	0.0394609	0.148185	0.434072	0.289931	0.134352	-0.0617077	0.0394866	0.118284	-0.00773383	0.0899854	0.931508	0.0478564	0.128102	0.708691	-0.0353916	0.039208	0.366824	0.0250964	0.0397594	0.527984	0.165794	0.081661	0.0423253	-0.0145098	0.111052	0.896049	0.0610387	0.080555	0.448603	0.240771	0.390526	0.537545	-0.189358	0.293517	0.518839	-0.0396987	0.0870895	0.648506	-0.229451
1	46358862	rs34444543	MAST2	G	A	0.711	1.04 (1.02-1.05)	3.3e-11	5.5e-13	-0.0383031	0.0343607	0.26511	0.206119	0.287279	0.473074	-0.0202569	0.0343947	0.555966	-0.0760903	0.0778805	0.328574	-0.100551	0.111154	0.365692	-0.0643595	0.0341071	0.0593205	0.0550657	0.0345925	0.111593	0.0836088	0.0717983	0.244226	-0.0208119	0.0970232	0.830192	-0.00780943	0.0699938	0.911114	1.02247	0.526672	0.0522133	-0.189562	0.23171	0.413294	-0.102611	0.0767036	0.180987	-0.00369317
1	51219188	rs12073283	FAF1	C	G	0.91	1.08 (1.06-1.09)	3.7e-17	6.7e-18	-0.0516944	0.057807	0.371301	-0.126183	0.44223	0.775386	-0.0512405	0.0578504	0.375873	-0.208363	0.127278	0.101613	-0.341673	0.171651	0.0465331	-0.0607202	0.0574116	0.290364	0.0245558	0.0582272	0.673277	0.0112177	0.120054	0.925552	-0.130063	0.15659	0.406186	0.0168369	0.117729	0.886281	-0.264239	0.551736	0.631992	0.433285	0.47299	0.359638	0.0183687	0.127876	0.885784	0.0217038
1	64114429	rs11576729	PGM1	G	T	0.806	1.05 (1.04-1.06)	2.6e-15	2.5e-17	0.0476762	0.0407716	0.242415	0.259713	0.34301	0.448955	0.0517231	0.0407994	0.205051	-0.0357918	0.0921533	0.697724	-0.037787	0.13157	0.773979	0.0554755	0.0404906	0.170828	-0.0116731	0.0410754	0.776299	-0.112721	0.0842182	0.180751	-0.121881	0.111624	0.27489	0.0148802	0.0830099	0.857736	-0.0619884	0.420395	0.882783	0.646359	0.353019	0.0671089	-0.12776	0.0920576	0.16518	-0.132317
1	117532790	rs1127215	PTGFRN	C	T	0.585	1.04 (1.03-1.05)	5.6e-16	3.9e-17	0.0356238	0.0331252	0.282324	0.209475	0.273855	0.444326	0.0112827	0.0331593	0.733702	0.0538312	0.0756464	0.476704	0.054959	0.109122	0.614507	-0.00884208	0.0329112	0.788218	0.00702466	0.0333704	0.833297	0.00466285	0.0687828	0.945954	-0.130054	0.0924174	0.159366	-0.120774	0.0676638	0.0742773	0.0318592	0.351092	0.927697	0.208961	0.240398	0.384723	0.0599623	0.0732633	0.413098	-0.0166998
1	120455586	rs835576	NOTCH2	C	T	0.11	1.07 (1.05-1.08)	2.7e-15	2.8e-17	0.0219603	0.0515621	0.670231	-0.114363	0.438737	0.794351	-0.0566243	0.0515862	0.272496	0.14163	0.115136	0.218649	0.150521	0.162625	0.354675	-0.0166339	0.0512149	0.74538	-0.056988	0.0519136	0.272459	-0.14923	0.108383	0.168553	-0.203138	0.153199	0.18485	0.120907	0.105519	0.251857	0.330555	0.491633	0.501355	0.0374018	0.363925	0.918134	-0.0773099	0.112813	0.493161	0.0152826
1	177889025	rs539515	SEC16B	C	A	0.196	1.06 (1.04-1.07)	7.6e-19	4.6e-20	-0.0439351	0.0408653	0.282462	0.114721	0.31571	0.716326	-0.0555288	0.0408881	0.174609	0.0348458	0.0927959	0.707286	0.229205	0.128339	0.0741097	-0.0684069	0.0405706	0.0919428	0.0191945	0.0411659	0.641075	0.0718554	0.0845499	0.395419	0.164887	0.111046	0.137579	-0.128525	0.0832077	0.122439	0.53074	0.373438	0.15525	0.324291	0.268507	0.227144	-0.086336	0.0896333	0.33544	0.117641
1	200416099	rs10919928	ZNF281	A	G	0.019	1.03 (1.02-1.05)	2e-05	4.6e-09	NA	NA	NA	NA	NA	NA	NA	NA	NA	NA	NA	NA	NA	NA	NA	NA	NA	NA	NA	NA	NA	NA	NA	NA	NA	NA	NA	NA	NA	NA	NA	NA	NA	NA	NA	NA	NA	NA	NA	NA
1	204539291	rs6689629	DSTYK-MDM4	A	G	0.805	1.04 (1.02-1.05)	3.1e-09	5.6e-10	-0.0555643	0.040653	0.171857	0.149265	0.337141	0.657957	-0.0120278	0.040703	0.767644	-0.178096	0.0907576	0.0497207	-0.23459	0.127256	0.0652656	-0.0389464	0.0403887	0.335028	-0.0187876	0.04096	0.646518	-0.137934	0.0839475	0.100365	-0.150538	0.110917	0.174718	-0.0775257	0.0830144	0.35038	1.00407	0.608642	0.0990057	-0.0168964	0.286699	0.953003	-0.00290577	0.090151	0.974301	-0.0310528
1	205107793	rs12039805	DSTYK-MDM4	A	G	0.236	1.03 (1.02-1.04)	2e-08	2.3e-09	-0.082317	0.0383543	0.0319856	0.536493	0.281195	0.0564027	-0.0342563	0.0384227	0.372744	-0.000772298	0.0874357	0.992953	0.13688	0.122609	0.264263	-0.0351581	0.0381342	0.356672	-0.0348738	0.0386664	0.367221	-0.120379	0.0803001	0.133843	-0.0414566	0.10879	0.703149	0.00132912	0.0782102	0.986417	0.456583	0.374731	0.223062	0.166709	0.262349	0.525134	-0.0619775	0.0844666	0.463102	-0.0655652
1	206600992	rs9429893	SRGAP2	A	G	0.494	1.03 (1.02-1.04)	1.9e-09	2.3e-09	0.0321464	0.0322713	0.31932	0.0104848	0.262901	0.96818	-0.00669239	0.0323038	0.8359	0.0353768	0.073585	0.63066	-0.0067598	0.106037	0.949171	0.0176804	0.0320594	0.581366	0.0555952	0.0324833	0.0871575	-0.0404793	0.0670759	0.546185	0.06961	0.0905563	0.442048	-0.0114614	0.065757	0.861626	-0.0548491	0.342273	0.872683	-0.0302386	0.230495	0.895626	-0.0611842	0.0714428	0.39177	0.0532848
1	214150821	rs79687284	PROX1	C	G	0.034	1.17 (1.13-1.21)	5.2e-17	6.9e-19	-0.121123	0.10645	0.255337	NA	NA	NA	0.0162043	0.106567	0.879158	-0.253192	0.253834	0.318536	-0.117331	0.356721	0.742219	0.0296114	0.105766	0.779532	-0.116369	0.107209	0.277872	-0.422731	0.231158	0.0674373	0.173979	0.275032	0.527007	0.266057	0.22136	0.229398	0.104945	1.00947	0.917199	0.848654	0.518084	0.101409	0.134513	0.245261	0.583378	-0.409576
1	214159256	rs340874	PROX1	C	T	0.551	1.05 (1.04-1.06)	1.1e-17	1.1e-18	-0.0384397	0.0326455	0.239154	0.14982	0.261372	0.566504	-0.00952798	0.0326814	0.77067	0.0117113	0.074196	0.874576	0.0599687	0.106847	0.574621	-0.049444	0.0324167	0.127365	-0.0436176	0.0328739	0.184735	-0.152876	0.0678737	0.0243018	0.00243596	0.0914988	0.97876	0.0863425	0.0665542	0.194519	-0.0296073	0.342363	0.931087	-0.0668078	0.227886	0.769395	0.0793896	0.0723706	0.272645	-0.0228177
1	219748818	rs2820446	LYPLAL1	C	G	0.708	1.05 (1.03-1.06)	1.4e-16	2.7e-18	0.00788132	0.0358654	0.826092	-0.317035	0.274872	0.248751	0.030237	0.0358857	0.399566	-0.0592496	0.0813442	0.466394	-0.102042	0.115948	0.378833	0.0322995	0.0356156	0.364584	-0.0198246	0.0361175	0.583147	0.0161294	0.0745906	0.828799	0.0940503	0.102469	0.358706	0.0205507	0.0730374	0.77843	0.0406772	0.388093	0.916524	-0.298563	0.243822	0.220763	-0.109105	0.0801405	0.173386	-0.00287586
1	229672955	rs348330	ABCB10-NUP133	G	A	0.36	1.05 (1.04-1.06)	4.7e-17	3.7e-18	0.0209552	0.0335559	0.532387	-0.284249	0.279488	0.309138	0.0238095	0.0335799	0.47839	-0.074004	0.0767485	0.334926	-0.238453	0.113253	0.0352495	0.0207173	0.0333293	0.534286	0.0257792	0.0337924	0.445639	0.040614	0.0696082	0.559565	0.0227688	0.0941984	0.80903	-0.00267558	0.0683417	0.968767	-0.239523	0.370233	0.517663	-0.39216	0.252438	0.120306	0.116573	0.0747634	0.118941	0.153571
2	422144	rs62107261	TMEM18	T	C	0.954	1.11 (1.07-1.14)	4.7e-10	4.4e-10	0.110526	0.0868924	0.20354	0.177521	0.725931	0.80681	0.150003	0.086925	0.0845778	0.272876	0.21206	0.198167	-0.00270633	0.289391	0.992549	0.146976	0.0862753	0.0886304	0.0168017	0.0875469	0.847829	-0.0942733	0.179091	0.59861	0.138509	0.257785	0.591057	0.236404	0.177071	0.181852	-0.974088	0.62056	0.116488	-0.0351258	0.606703	0.953827	-0.348937	0.20715	0.0920893	-0.0824644
2	653874	rs10188334	TMEM18	C	T	0.829	1.06 (1.05-1.08)	2.7e-14	3.8e-15	0.0601609	0.0435252	0.167077	-0.189314	0.324053	0.559079	0.0330289	0.0435735	0.448546	0.0302963	0.0992554	0.760183	0.0701704	0.14444	0.6271	0.0707345	0.0432222	0.1019	-0.0295037	0.0438516	0.501154	-0.0553685	0.0901127	0.538952	0.044325	0.123105	0.718806	0.080307	0.0886384	0.364935	-0.205859	0.425411	0.628452	-0.032835	0.29938	0.912672	-0.0234333	0.0969135	0.808944	0.00713338
2	25533568	rs55928417	DTNB	G	T	0.57	1.03 (1.02-1.05)	9.1e-11	4e-11	-0.0301963	0.0327473	0.356597	-0.199465	0.263071	0.448324	0.0221454	0.0327753	0.499334	-0.0674343	0.0745538	0.36575	0.14269	0.10827	0.187538	-0.0278976	0.0325272	0.391187	-0.0170814	0.032985	0.604624	-0.112918	0.0680647	0.0971268	0.00504973	0.0919842	0.956222	-0.103855	0.0668437	0.120269	0.151571	0.349391	0.664423	0.281524	0.237232	0.235345	0.0121202	0.0724937	0.867223	0.104037
2	27730940	rs1260326	GCKR	C	T	0.607	1.06 (1.05-1.07)	2.4e-35	4.6e-38	-0.00935274	0.0320881	0.770724	-0.133315	0.25407	0.599775	0.0333514	0.0321033	0.298999	-0.10915	0.0727738	0.133647	-0.117178	0.104307	0.261276	0.00424291	0.0318719	0.89411	-0.00945584	0.0323158	0.769856	-0.00292572	0.0665459	0.964917	0.00317403	0.0898647	0.971825	0.0296338	0.065359	0.650256	-0.932656	0.360077	0.00959318	0.229346	0.22998	0.318645	0.0483377	0.0710683	0.496402	0.029158
2	43671176	rs13414140	THADA	C	T	0.892	1.09 (1.07-1.11)	6.2e-24	5.2e-31	0.0638356	0.0482681	0.186159	0.413248	0.468337	0.377575	0.0599247	0.0483069	0.214949	0.159274	0.112701	0.157584	0.296101	0.172547	0.0861496	0.0972979	0.0479111	0.0424192	0.0702143	0.0486062	0.148754	0.159603	0.101426	0.115583	0.131183	0.139439	0.346809	0.18194	0.0984353	0.0645557	0.112775	0.523722	0.829509	-0.0985413	0.319459	0.75773	-0.167851	0.110686	0.129408	0.0419195
2	45192080	rs12712928	SIX3-SIX2	C	G	0.162	1.01 (1.00-1.02)	0.13	2.4e-14	0.0407454	0.0445018	0.360003	0.496481	0.315828	0.115953	0.00694066	0.0445449	0.876198	0.150427	0.0995487	0.130759	0.157021	0.141399	0.266791	0.00607559	0.0442111	0.890712	0.0474894	0.0448142	0.289423	0.126254	0.0918517	0.16927	0.215281	0.119517	0.0716638	-0.0758589	0.0906001	0.402427	0.260216	0.432032	0.546972	0.121607	0.306158	0.691217	0.189918	0.10135	0.0609419	0.249022
2	58961136	rs17049712	BNIPL	T	C	0.291	1.03 (1.02-1.05)	1e-09	2.3e-09	0.000925837	0.035695	0.97931	-0.190624	0.301354	0.527021	-0.00822704	0.0357211	0.817874	-0.110284	0.0821963	0.17969	-0.103165	0.118914	0.385634	-0.00108096	0.0354539	0.97568	0.0104548	0.0359475	0.771209	-0.0490957	0.0743109	0.508818	0.0448586	0.0997582	0.652962	0.0568056	0.0727701	0.435013	0.0022774	0.380506	0.995216	0.00639948	0.252947	0.979817	0.0742258	0.0794624	0.350264	0.0190474
2	60586707	rs243018	BCL11A	G	C	0.46	1.06 (1.05-1.07)	3.4e-32	6.7e-35	-0.0287314	0.0328889	0.382455	0.314555	0.272571	0.248492	0.0319159	0.0329118	0.332304	0.0163063	0.0749134	0.827659	0.0852966	0.108013	0.429693	0.0366605	0.0326623	0.261835	-0.0132567	0.0331278	0.68908	-0.0611576	0.0683004	0.370559	0.143347	0.0922009	0.120006	0.156132	0.0672385	0.0202308	0.268683	0.349062	0.441465	0.091877	0.235027	0.695863	-0.0340119	0.0728477	0.640579	0.121509
2	65284231	rs2540949	CEP68	A	T	0.617	1.03 (1.02-1.04)	1.1e-10	8.3e-12	-0.0395324	0.0330903	0.232365	-0.141682	0.264054	0.59157	-0.0489209	0.0331082	0.139685	0.023066	0.0753724	0.759585	0.103447	0.109444	0.344557	-0.0692031	0.0328399	0.035228	0.0109831	0.0333372	0.74185	0.10677	0.0688999	0.121228	0.00436552	0.0927289	0.962447	-0.0785339	0.0675222	0.244775	-0.238403	0.343902	0.488166	-0.113516	0.232325	0.625105	0.0551069	0.0731694	0.451369	0.00401706
2	65666674	rs6752053	CEP68	T	C	0.6	1.05 (1.04-1.06)	2.9e-17	1.3e-18	0.065016	0.0330537	0.0493355	0.110595	0.269087	0.68107	-0.0192342	0.0331101	0.561369	0.160334	0.0760824	0.0350852	0.183387	0.109884	0.0951345	0.0057494	0.0328647	0.861145	0.0285979	0.0333167	0.390802	0.0678346	0.0688796	0.324709	-0.0446387	0.0931811	0.631929	-0.104783	0.0674858	0.120508	-0.172094	0.358058	0.630784	-0.396189	0.233964	0.0903824	-0.0180069	0.0731188	0.805503	-0.0681445
2	121347612	rs11688682	GLI2	G	C	0.728	1.06 (1.04-1.07)	4.4e-15	5.3e-16	-0.0567403	0.0383687	0.139361	-0.0615842	0.306825	0.840925	-0.101727	0.0383468	0.00805094	-0.0945099	0.0867363	0.275889	0.0260299	0.12718	0.837831	-0.0862079	0.0380791	0.0236957	0.0399121	0.0386529	0.301937	0.0858226	0.0799703	0.283192	-0.225732	0.104152	0.0302114	-0.0113058	0.0782518	0.885083	1.22541	0.605269	0.042912	0.208517	0.287782	0.468718	0.0750889	0.0845611	0.374547	-0.041401
2	121440218	rs10864859	GLI2	T	G	0.922	1.06 (1.04-1.07)	3e-10	1.9e-10	-0.0208448	0.0603563	0.729862	-0.213263	0.434399	0.623465	-0.129308	0.0603278	0.0322097	0.0933803	0.140868	0.507401	0.404038	0.230907	0.0801548	-0.0960536	0.0599086	0.109033	0.00402644	0.0607867	0.947195	0.162991	0.127586	0.201427	0.0044087	0.172018	0.979555	-0.0665365	0.123148	0.589008	-0.506179	0.538708	0.347417	0.212142	0.46884	0.650922	-0.222319	0.138236	0.107783	0.159576
2	158390468	rs7594480	CYTIP	T	C	0.936	1.08 (1.06-1.10)	1.5e-12	4e-12	0.0838913	0.0688685	0.223329	0.0814747	0.591388	0.890424	-0.0113071	0.0689473	0.869752	0.195699	0.165447	0.236868	0.26023	0.253646	0.304911	0.00808988	0.0684308	0.905906	0.0943771	0.0693504	0.173721	0.0643444	0.144477	0.656061	0.0733387	0.200582	0.714643	0.142028	0.140271	0.311288	0.608251	1.01487	0.548949	-0.240543	0.467281	0.606708	0.100881	0.149149	0.498804	0.0588555
2	161144055	rs1020731	RBSM1	A	G	0.719	1.03 (1.02-1.04)	4.1e-08	1.2e-09	-0.0264558	0.035899	0.461247	0.127844	0.298569	0.668515	0.0251931	0.0359263	0.483239	-0.15206	0.0804774	0.0588356	-0.0435383	0.115526	0.706242	0.0261155	0.0356566	0.464008	-0.00720805	0.0361588	0.842015	0.0813033	0.0746613	0.276173	0.181026	0.102922	0.0785999	0.117481	0.0731533	0.108282	-0.0841941	0.369271	0.81965	-0.364664	0.237274	0.124318	-0.162221	0.0810536	0.0453501	-0.0289664
2	163649480	rs12614955	KCNH7	T	C	0.703	1.03 (1.02-1.04)	3.6e-10	8.6e-10	NA	NA	NA	NA	NA	NA	NA	NA	NA	NA	NA	NA	NA	NA	NA	NA	NA	NA	NA	NA	NA	NA	NA	NA	NA	NA	NA	NA	NA	NA	NA	NA	NA	NA	NA	NA	NA	NA	NA	NA
2	165508389	rs10184004	GRB14	C	T	0.587	1.07 (1.05-1.08)	1.9e-30	5.2e-34	-0.0372027	0.0333465	0.264722	-0.0947009	0.267211	0.723044	-0.000499355	0.0333827	0.988067	-0.00362343	0.0758137	0.961889	-0.10463	0.108474	0.334745	-0.018794	0.0331296	0.570589	0.0122891	0.0335934	0.714542	-0.0223777	0.0691372	0.746142	0.0374464	0.0935867	0.689066	-0.114078	0.0681061	0.0939242	0.544943	0.379953	0.151505	0.00931929	0.23513	0.968383	0.0564074	0.0738146	0.444759	0.10684
2	213818731	rs16849467	IKZF2	T	C	0.688	1.04 (1.02-1.05)	2.5e-09	4.8e-09	-0.0471951	0.0332469	0.155914	0.304172	0.290855	0.295661	-0.0325783	0.0332813	0.32777	-0.0283736	0.0754858	0.707017	-0.0221528	0.108334	0.837965	-0.0449453	0.0330238	0.173682	-0.0356277	0.033491	0.287559	-0.0425613	0.0689381	0.536999	-0.0660499	0.0923533	0.474521	-0.0527063	0.0678278	0.437139	0.00495224	0.351827	0.98877	0.0666592	0.238143	0.779545	-0.139101	0.0746976	0.0625812	-0.102827
2	227100490	rs2943648	IRS1	G	A	0.637	1.09 (1.07-1.10)	4.6e-45	3.6e-52	-0.00606036	0.0336304	0.857012	-0.138474	0.262179	0.59739	0.0139455	0.0336542	0.678647	-0.109957	0.0762123	0.149078	-0.164896	0.108333	0.127972	-0.0103106	0.0334026	0.757604	-0.0402707	0.0338563	0.234413	-0.0971086	0.0697985	0.164144	0.0797133	0.0958587	0.405653	0.00430325	0.0684707	0.949891	-0.0850854	0.355343	0.810764	0.263972	0.250013	0.291046	-0.0626367	0.0746538	0.401451	0.0139478
2	234191103	rs117809958	ATG16L1-DGKD	A	T	0.003	1.24 (1.16-1.31)	1.5e-11	5.6e-12	NA	NA	NA	NA	NA	NA	NA	NA	NA	NA	NA	NA	NA	NA	NA	NA	NA	NA	NA	NA	NA	NA	NA	NA	NA	NA	NA	NA	NA	NA	NA	NA	NA	NA	NA	NA	NA	NA	NA	NA
3	12329783	rs17036160	PPARG	C	T	0.874	1.12 (1.10-1.14)	9.7e-41	1.1e-46	-0.0700538	0.0501743	0.16282	0.0464503	0.404893	0.908666	-0.0200162	0.0502362	0.690351	-0.126042	0.111536	0.258465	-0.256013	0.151587	0.0912445	-0.0304222	0.0498568	0.541811	-0.00558392	0.0505571	0.912066	-0.00990082	0.103999	0.924176	0.134959	0.145761	0.354502	-0.0518237	0.102356	0.612607	0.0579872	0.540127	0.914505	-0.0200183	0.344817	0.953709	0.0436782	0.11066	0.693059	-0.0489901
3	12490951	rs4684855	PPARG	T	C	0.424	1.04 (1.03-1.05)	7.1e-14	2.1e-14	0.0339439	0.0327338	0.299887	0.0825565	0.263006	0.753605	-0.0356563	0.0327572	0.276516	0.0384704	0.0745184	0.605718	0.0872414	0.106956	0.414704	-0.0216407	0.0325183	0.505818	0.0214008	0.032972	0.51638	-0.00238885	0.0680345	0.971994	-0.0583115	0.0925632	0.528715	0.0143466	0.0666932	0.829716	-0.490144	0.374202	0.19025	0.074263	0.232504	0.749431	-0.0544879	0.0722818	0.450952	-0.00534928
3	23457080	rs13094957	UBE2E2	T	C	0.789	1.07 (1.06-1.08)	1.6e-28	7.1e-39	-0.0269307	0.040923	0.510567	0.112665	0.339677	0.740129	-0.0255297	0.040954	0.533116	0.043745	0.0937235	0.640681	0.0365665	0.135315	0.786982	-0.0286961	0.0406458	0.480276	0.0269418	0.0412135	0.513378	0.0869881	0.0854177	0.308497	0.0728352	0.116669	0.53244	0.0705298	0.0832902	0.397111	-0.0657316	0.425794	0.877317	-0.0381143	0.287036	0.894362	-0.0701602	0.0914301	0.442855	-0.0854986
3	23632174	rs76435632	UBE2E2	G	C	0.036	1.10 (1.08-1.13)	1.2e-19	3.2e-26	0.219367	0.0996889	0.0278948	0.734879	0.610713	0.228854	0.120844	0.099855	0.22636	0.229881	0.218075	0.291827	-0.0185418	0.32722	0.954812	0.180018	0.099057	0.0693321	0.00948555	0.100529	0.924836	0.0212036	0.207045	0.918433	0.093545	0.273525	0.73236	0.146202	0.204362	0.474356	NA	NA	NA	-0.723895	1.01578	0.476063	-0.0777097	0.217429	0.72079	0.189016
3	50174197	rs2624847	RBM6	G	T	0.251	1.03 (1.02-1.05)	3.6e-08	6.2e-11	0.0673218	0.0387504	0.0824984	0.187392	0.297695	0.529032	0.128843	0.0386944	0.000886479	0.0699644	0.0875809	0.424352	0.214514	0.121571	0.0776501	0.0894294	0.0384637	0.0201787	0.00787284	0.0390571	0.840273	-0.0707262	0.0808573	0.381732	0.0112465	0.108935	0.917748	0.0274206	0.0790177	0.728604	0.719005	0.357313	0.0441939	0.620469	0.240909	0.0100085	0.175423	0.0876949	0.0454586	0.111863
3	54828827	rs76263492	CACNA2D3	T	G	0.045	1.10 (1.06-1.13)	9.4e-10	8.7e-10	-0.0608357	0.0738968	0.410472	-0.509027	0.729639	0.4854	-0.155378	0.0738765	0.0355837	0.20467	0.163294	0.210067	0.146185	0.232959	0.530328	-0.0915829	0.07338	0.212167	-0.0222912	0.0744332	0.764608	0.0298694	0.153377	0.845575	-0.198802	0.222411	0.3714	-0.0652225	0.150329	0.664388	0.170198	0.747756	0.819945	0.473398	0.444638	0.28702	-0.35262	0.156043	0.0238357	-0.188503
3	58338809	rs12629058	PXK	T	C	0.255	1.04 (1.02-1.05)	3.6e-10	3.5e-11	-0.0689084	0.0378349	0.0687254	-0.588749	0.36647	0.108155	0.0156869	0.0378956	0.678959	-0.118599	0.0876695	0.176123	0.0209882	0.124013	0.865583	-0.0104657	0.0376125	0.780852	0.00223841	0.0381379	0.953203	0.0352899	0.0785977	0.653395	-0.066315	0.10793	0.538933	-0.0472489	0.0771146	0.540067	-0.0148629	0.406696	0.970848	-0.0162635	0.271413	0.952217	0.0108212	0.083767	0.897201	0.043117
3	63897215	rs2292662	PSMD6-ADAMTS9	C	T	0.84	1.06 (1.05-1.07)	3.1e-21	6.4e-32	0.04881	0.0439802	0.267223	0.211671	0.382027	0.579529	0.114342	0.0439468	0.00934769	-0.0247414	0.0996326	0.803861	0.2253	0.152861	0.140513	0.102669	0.0436321	0.0187243	0.0427054	0.0442961	0.335128	-0.00442022	0.0912502	0.961355	0.138516	0.127282	0.276478	0.0470015	0.0895612	0.599725	0.669065	0.601645	0.266112	0.149087	0.326364	0.647805	-0.0806026	0.0986265	0.413803	0.0559293
3	64703394	rs66815886	PSMD6-ADAMTS9	G	T	0.721	1.04 (1.03-1.05)	9.5e-12	1.2e-13	-0.0465392	0.0347306	0.180409	-0.180244	0.272463	0.508263	0.0303757	0.0347662	0.382388	0.0760693	0.0795936	0.339214	0.228673	0.118267	0.0531722	-0.00265373	0.0345128	0.938719	-0.0146854	0.0349925	0.674774	0.000839352	0.072072	0.990707	0.16265	0.0995134	0.102166	0.0173049	0.0707742	0.806834	0.287493	0.38779	0.458475	0.230987	0.257612	0.369908	0.0263861	0.0768451	0.731322	0.17302
3	114960798	rs1459513	ZBTB20	C	A	0.062	1.05 (1.04-1.07)	7.6e-14	9.6e-15	0.0215154	0.0699489	0.758432	-0.21871	0.602354	0.716536	-0.00845206	0.0700026	0.903911	0.0695447	0.156892	0.657587	-0.133793	0.240175	0.577483	-0.0130371	0.0694776	0.851176	0.0640009	0.0704314	0.363629	0.0784969	0.144425	0.58679	0.0908457	0.19024	0.632988	0.0129458	0.142565	0.927636	0.0141297	0.717656	0.984296	0.336508	0.428223	0.431966	-0.0154568	0.154847	0.920488	-0.35175
3	123065778	rs11708067	ADCY5	A	G	0.775	1.10 (1.08-1.12)	2.4e-41	3.4e-46	-0.00910674	0.0399803	0.819842	-0.215192	0.303741	0.478658	-0.0432718	0.0399979	0.279461	0.0143911	0.0914453	0.87495	-0.121058	0.128439	0.345939	-0.023085	0.0397072	0.561055	0.0257993	0.0402602	0.521723	-0.0728786	0.0827563	0.378539	0.203386	0.117799	0.0842473	-0.154659	0.0818696	0.0588827	-0.513237	0.382411	0.179558	-0.175205	0.272356	0.520031	-0.0263595	0.0886087	0.766135	0.199738
3	124921457	rs9873519	SLC12A8	T	C	0.538	1.04 (1.03-1.05)	9.8e-14	6.5e-14	-0.0111224	0.0328237	0.734759	-0.551647	0.270013	0.041049	-0.0313998	0.032841	0.339141	-0.14143	0.0747372	0.058442	0.0830675	0.107899	0.441378	-0.0278593	0.0325965	0.392845	0.0558112	0.033032	0.0912728	0.148962	0.0683817	0.0293767	-0.0218006	0.0921003	0.812905	-0.118956	0.0670065	0.0758476	-0.527305	0.353109	0.135352	-0.199457	0.232714	0.39139	-0.186206	0.0731561	0.0109194	-0.00405178
3	151998053	rs1426385	MBNL1	A	G	0.456	1.04 (1.03-1.05)	2.1e-13	1.9e-15	0.0141939	0.0327569	0.66484	0.319515	0.261146	0.221131	-0.0133785	0.0327815	0.683239	0.0294714	0.0742851	0.691565	0.0575422	0.106212	0.587955	0.0223222	0.0325331	0.492712	0.0180766	0.0329884	0.583779	0.0519471	0.0679083	0.444264	0.043634	0.0913486	0.632908	0.0138043	0.0667292	0.836098	-0.530923	0.374477	0.156257	-0.98435	0.282074	0.000483589	-0.0369005	0.0725732	0.61113	0.22139
3	152399693	rs10935897	MBNL1	A	G	0.355	1.03 (1.02-1.04)	3.3e-11	1.2e-12	-0.0204821	0.0343595	0.551175	-0.454551	0.303056	0.133642	-0.0264694	0.0343829	0.441493	-0.118324	0.0791323	0.134842	-0.206633	0.116267	0.0755294	-0.0343172	0.0341214	0.314674	-0.0455483	0.0345904	0.188074	-0.0343399	0.0714551	0.630811	-0.0391775	0.0970384	0.68641	-0.058161	0.0699729	0.405864	0.202933	0.356274	0.568958	0.513638	0.234442	0.0284601	-0.0753434	0.0757411	0.319855	0.0666956
3	152530027	rs75417759	MBNL1	C	T	0.958	1.07 (1.04-1.10)	5.3e-07	3.8e-10	-0.0361635	0.0905378	0.689623	0.770637	1.01657	0.448403	0.226774	0.0904545	0.0122603	0.131009	0.213197	0.538886	0.127464	0.311036	0.681949	0.0743659	0.0899134	0.408297	-0.0553321	0.0911753	0.544008	-0.256184	0.18634	0.169192	0.43832	0.299731	0.143637	0.188563	0.184588	0.307001	NA	NA	NA	-0.180211	0.59867	0.763405	0.0774168	0.196936	0.694242	-0.158481
3	170724883	rs8192675	SLC2A2	T	C	0.712	1.06 (1.04-1.07)	5.1e-23	3.5e-28	0.0201997	0.0356396	0.570934	-0.109912	0.281637	0.696347	-0.030679	0.0356621	0.389753	-0.0721346	0.0804357	0.369857	-0.0348844	0.115627	0.762854	-0.0243553	0.0353974	0.491505	0.0320035	0.0358879	0.372637	-0.00310517	0.0738454	0.96642	-0.0395764	0.0989082	0.689045	-0.0159324	0.072625	0.826392	0.160441	0.385829	0.677532	0.274926	0.267116	0.303368	-0.0137648	0.0791911	0.861977	0.0771359
3	185510613	rs7633675	IGF2BP2	G	T	0.316	1.12 (1.11-1.14)	7.9e-111	5.8e-131	0.0499854	0.0348203	0.151308	0.110288	0.274736	0.688102	0.00237528	0.0348658	0.945693	-0.0360563	0.079592	0.650537	-0.133264	0.116608	0.253107	0.0221264	0.0346007	0.522592	0.0179202	0.0350847	0.609574	-5.40015e-05	0.0723469	0.999407	-0.0880086	0.0990808	0.374406	0.000569838	0.0709625	0.993557	-0.425275	0.407216	0.296324	-0.312387	0.262671	0.234333	0.0538251	0.0773845	0.486741	0.0244487
3	186665645	rs3887925	ST6GAL1	T	C	0.545	1.05 (1.04-1.06)	2.6e-26	5.5e-32	0.0256038	0.0323042	0.428122	0.324985	0.268108	0.225457	0.0129019	0.0323324	0.68991	0.155783	0.0741365	0.0356145	0.264388	0.108428	0.0147536	0.0335353	0.0320819	0.296021	-0.0380845	0.0325269	0.241806	-0.0423121	0.0670501	0.527966	0.0546547	0.0910789	0.548454	-0.100551	0.0659178	0.127145	-0.324385	0.342919	0.344177	-0.432724	0.231167	0.0612208	0.117735	0.071407	0.099194	0.0655406
3	186676455	rs9799068	ST6GAL1	A	C	0.109	1.04 (1.02-1.05)	1.4e-08	8.2e-11	0.00242195	0.0521318	0.96295	-0.537486	0.510923	0.292805	0.0465973	0.0521593	0.37178	-0.245878	0.124129	0.0476111	-0.287053	0.185599	0.121953	-0.00220298	0.0517797	0.966069	-0.0276075	0.0524979	0.599036	-0.00352822	0.108218	0.973994	0.0205474	0.145093	0.887391	0.168332	0.107042	0.115816	-0.610241	0.713939	0.392688	0.0230425	0.348675	0.947306	-0.121208	0.113706	0.286434	-0.241192
3	187740899	rs4686471	BCL6-LPP	C	T	0.611	1.06 (1.04-1.07)	2.7e-19	2.9e-21	0.0407723	0.033832	0.228305	-0.489671	0.261145	0.0607792	-0.0291939	0.0338637	0.388746	0.0906044	0.0771511	0.240246	0.00811988	0.110215	0.941269	0.0103398	0.0336159	0.758432	0.0125464	0.0340843	0.712842	0.152177	0.0705298	0.0309568	0.00519849	0.0946725	0.956209	0.010013	0.0689272	0.884497	0.0224215	0.35227	0.949249	0.0541606	0.23479	0.817565	0.0145635	0.0750628	0.846163	-0.0358979
3	195825077	rs74289356	TFRC	T	C	0.075	1.05 (1.03-1.06)	1.2e-11	6.8e-12	-0.0771823	0.0558807	0.167386	0.149454	0.412789	0.717306	-0.015635	0.0559502	0.779935	-0.199945	0.133168	0.133241	-0.217427	0.199149	0.27493	-0.0508555	0.0555194	0.35979	0.111198	0.0562467	0.0481955	-0.00682625	0.116176	0.953145	0.202239	0.148653	0.173686	0.180896	0.114923	0.115477	0.56293	0.473947	0.23493	0.432477	0.333423	0.1946	0.134251	0.126792	0.289684	0.231604
4	726202	rs73221123	CTBP1-PCGF3-MAEA	T	C	0.045	1.09 (1.07-1.12)	9.2e-12	1.1e-12	0.0962271	0.0908798	0.289812	-0.793677	1.02067	0.436801	0.0444497	0.0909694	0.625168	-0.00126981	0.206478	0.995093	0.0929893	0.285358	0.744531	0.0858087	0.0902713	0.341951	-0.0742471	0.0915365	0.417402	-0.223042	0.193033	0.247902	-0.234883	0.275571	0.394021	-0.0862858	0.184807	0.640573	NA	NA	NA	0.671372	0.482915	0.164454	0.17966	0.207983	0.387678	0.336558
4	1240299	rs730831	CTBP1-PCGF3-MAEA	T	G	0.959	1.09 (1.07-1.11)	9.8e-26	8.2e-37	-0.0227498	0.0783469	0.771564	-0.120012	0.599378	0.8413	-0.235681	0.0782138	0.00261967	-0.133823	0.173802	0.441315	0.046751	0.262768	0.858787	-0.168322	0.0777202	0.030459	0.0285813	0.078902	0.717216	-0.0880933	0.161223	0.584768	-0.244921	0.204663	0.231419	-0.0222604	0.159701	0.889168	0.395595	1.01657	0.697167	0.115613	0.599045	0.846962	-0.054062	0.174979	0.75736	0.217256
4	1784605	rs6831006	CTBP1-PCGF3-MAEA	G	C	0.503	1.06 (1.04-1.07)	4.3e-21	3.9e-26	0.00425997	0.0337236	0.899492	0.334349	0.274741	0.223618	-0.0426283	0.0337343	0.206517	0.0609728	0.0768501	0.427523	0.184037	0.110808	0.0967399	-0.0353001	0.0334859	0.29194	0.0273267	0.0339572	0.421074	-0.0168278	0.0700497	0.810156	0.0158241	0.0948854	0.867576	-0.0767968	0.0687221	0.263784	-0.227044	0.362243	0.530809	-0.338065	0.241607	0.161742	0.00987112	0.0745762	0.894722	0.00409162
4	6293237	rs9998835	WFS1	G	C	0.595	1.08 (1.07-1.09)	4.9e-41	3.1e-51	0.0356394	0.0342532	0.298259	-0.029452	0.272208	0.913851	0.0273466	0.0342829	0.425163	0.127197	0.0784033	0.104729	0.129875	0.113026	0.250523	0.0136851	0.0340303	0.687625	0.0238501	0.034502	0.489485	0.0430453	0.0711614	0.545251	0.23387	0.0981982	0.0172372	-0.00800785	0.0697859	0.908648	0.104274	0.365623	0.775494	0.0373831	0.240257	0.876352	0.0495643	0.0758094	0.513236	0.146437
4	18047401	rs6855926	LCORL	A	G	0.696	1.04 (1.03-1.05)	1.7e-11	8.4e-12	-0.0132427	0.0359476	0.712626	0.332744	0.312338	0.286724	0.0191945	0.0359729	0.593696	-0.0807133	0.0814129	0.321481	-0.129676	0.115996	0.263595	-0.00360688	0.035706	0.919549	0.053757	0.0361823	0.137524	-0.0633597	0.074511	0.395158	0.214692	0.105177	0.0412272	0.124739	0.0732295	0.0884929	0.556357	0.450117	0.216449	-0.0815247	0.25256	0.746848	0.0165441	0.0793389	0.834824	0.0860122
4	45175691	rs13130484	GNPDA2	T	C	0.43	1.04 (1.03-1.05)	5.1e-15	1.3e-15	-0.00531002	0.0329261	0.871898	-0.809663	0.301479	0.00723917	-0.0508662	0.0329295	0.122591	-0.0641386	0.07526	0.394084	0.112373	0.107745	0.296963	-0.0422851	0.032689	0.195982	-0.0189555	0.0331571	0.567604	-0.0222722	0.0684331	0.744828	-0.169074	0.0938622	0.0716548	-0.0933694	0.0671082	0.164128	-0.0469354	0.352787	0.89416	-0.158386	0.237919	0.505595	-0.16762	0.0727042	0.0211384	-0.0628333
4	71835822	rs7674402	MOB1B	A	G	0.042	1.06 (1.04-1.08)	1.5e-13	1.2e-13	0.000788629	0.0736979	0.991463	-0.606494	0.738769	0.411674	0.0129359	0.0737522	0.860787	0.0651415	0.165279	0.693503	0.308771	0.219796	0.160082	-0.049913	0.0731908	0.495352	0.0496449	0.0742119	0.503605	0.014455	0.152656	0.92458	-0.0809498	0.210075	0.699987	0.105854	0.150614	0.48216	-0.00827918	0.759547	0.991303	-0.115932	0.537336	0.829181	0.3764	0.175424	0.0318999	0.197941
4	83587562	rs10471048	SCD5	G	C	0.343	1.03 (1.02-1.04)	7.6e-10	2.3e-11	0.014937	0.0338579	0.659145	0.368829	0.266232	0.16594	-0.0155326	0.033883	0.646706	0.0227199	0.077004	0.767992	-0.011602	0.111398	0.91705	-0.0385049	0.033619	0.252221	-0.0042151	0.0340999	0.901637	0.0626931	0.0701762	0.371653	-0.0654072	0.0954529	0.493201	0.0475132	0.0690484	0.491385	-0.00402609	0.357639	0.991017	0.0595605	0.241948	0.805549	-0.0604158	0.0747631	0.419037	0.0163654
4	85339618	rs117624659	NKX6-1-CDS1	T	C	0.954	1.24 (1.17-1.31)	3e-14	3.1e-14	NA	NA	NA	NA	NA	NA	NA	NA	NA	NA	NA	NA	NA	NA	NA	NA	NA	NA	NA	NA	NA	NA	NA	NA	NA	NA	NA	NA	NA	NA	NA	NA	NA	NA	NA	NA	NA	NA	NA	NA
4	95091911	rs6821438	SMARCAD1	A	G	0.534	1.02 (1.01-1.03)	3.3e-05	2.5e-09	-0.00678462	0.0327316	0.835814	0.459124	0.272226	0.0916892	0.0349721	0.0327462	0.285673	-0.0690129	0.0746666	0.355346	-0.037421	0.107921	0.728787	0.0041563	0.0325107	0.898286	0.0284536	0.0329576	0.388064	0.0828057	0.0680563	0.223712	0.0206732	0.0922324	0.822644	0.0609758	0.0666946	0.360587	0.0405272	0.348006	0.907292	-0.395879	0.234523	0.0914066	-0.103459	0.0725284	0.153748	0.0361848
4	102135363	rs2659518	PPP3CA	A	G	0.078	1.04 (1.03-1.05)	6.7e-09	4.5e-09	0.045524	0.0612174	0.457187	0.236881	0.44943	0.598145	-0.00137289	0.0612723	0.982126	0.15279	0.136621	0.263413	0.260948	0.188779	0.166877	0.000713018	0.0608131	0.990646	-0.029911	0.0616573	0.627652	0.0472652	0.126778	0.709269	0.0407388	0.170569	0.811249	-0.0213258	0.124624	0.864126	-1.111	1.02765	0.279648	0.147566	0.416184	0.722912	0.170106	0.138963	0.2209	0.0334928
4	103725894	rs223423	SLC9B1	G	A	0.523	1.02 (1.01-1.03)	1.3e-05	1.6e-09	0.00844746	0.0311832	0.7865	0.332516	0.256069	0.194101	-0.00802261	0.0312065	0.797145	0.0126011	0.0709369	0.859008	0.0435121	0.102112	0.67002	0.0195058	0.0309699	0.528883	-0.0211602	0.0314013	0.500483	0.0282122	0.0647616	0.663104	0.0355236	0.0877801	0.685704	0.0527702	0.0635166	0.406083	0.317976	0.340227	0.349994	0.205286	0.221922	0.354947	0.0545122	0.0689995	0.429502	-0.0220159
4	106048291	rs17035289	TET2	C	T	0.172	1.04 (1.03-1.05)	2.8e-11	1.3e-12	-0.0364144	0.0435536	0.403217	0.217753	0.328153	0.506971	-0.0444854	0.043582	0.307518	-0.121851	0.101012	0.227698	0.239607	0.135106	0.0761483	-0.00694009	0.0432674	0.872584	-0.0480383	0.0438568	0.27351	-0.0963391	0.0909572	0.289521	0.100234	0.119541	0.401763	-0.033013	0.0886839	0.709705	0.402641	0.409642	0.32565	-0.608516	0.377374	0.106853	-0.093791	0.0954551	0.325821	-0.170331
4	153520475	rs6813195	TMEM154	C	T	0.72	1.06 (1.05-1.07)	1.4e-33	3e-36	-0.0126637	0.0359956	0.72502	-0.378073	0.270569	0.16232	0.0115426	0.0360226	0.748682	-0.0318668	0.0816675	0.696369	-0.0395187	0.117278	0.736128	0.00511985	0.0357534	0.886149	-0.0303442	0.0362454	0.402596	-0.0698152	0.0745362	0.348926	0.156653	0.103751	0.131072	0.0289603	0.0732989	0.692768	0.421703	0.425766	0.321951	-0.101256	0.249176	0.684484	-0.0192927	0.0798131	0.809008	0.0128533
4	157725916	rs1425482	PDGFC	T	C	0.757	1.03 (1.02-1.04)	1.7e-07	2.3e-11	0.0631326	0.0374191	0.0917397	-0.305947	0.272752	0.261992	0.0694542	0.037441	0.0637522	0.196696	0.0875287	0.0246256	0.0245601	0.123522	0.842396	0.0691217	0.0371602	0.0630313	0.00356244	0.0377139	0.924754	-0.0113058	0.077803	0.884473	-0.00733305	0.105683	0.944657	-0.0136366	0.0762575	0.858077	-0.347546	0.372254	0.3505	-0.348697	0.24497	0.154612	-0.149652	0.0841343	0.0752904	0.0345645
4	185714289	rs1996546	ACSL1	G	T	0.858	1.06 (1.05-1.08)	5.8e-13	1.6e-13	-0.00366123	0.0449993	0.935163	-0.355483	0.330299	0.281818	0.0812494	0.0449929	0.0711095	0.0604636	0.103417	0.558779	-0.161319	0.140493	0.250877	0.0725693	0.0446633	0.104375	0.0102916	0.0453181	0.820375	0.208362	0.0952414	0.0286892	-0.00138903	0.12624	0.991244	0.135703	0.0915859	0.138421	-0.994987	0.369243	0.00704576	-0.411089	0.279963	0.142002	-0.00352378	0.0996566	0.971805	0.153534
5	14755919	rs147581833	ANKH	C	T	0.994	1.40 (1.27-1.55)	3.3e-11	4.3e-11	NA	NA	NA	NA	NA	NA	NA	NA	NA	NA	NA	NA	NA	NA	NA	NA	NA	NA	NA	NA	NA	NA	NA	NA	NA	NA	NA	NA	NA	NA	NA	NA	NA	NA	NA	NA	NA	NA	NA	NA
5	14780521	rs30614	ANKH	A	G	0.543	1.04 (1.03-1.06)	1.3e-11	1.7e-11	-0.0474547	0.0327868	0.147964	-0.294168	0.262941	0.263236	-0.0229671	0.0328256	0.484221	-0.117801	0.0745934	0.114287	-0.0630781	0.107258	0.556495	-0.0546688	0.0325589	0.093308	-0.00375562	0.0330382	0.909508	-0.0230034	0.0680787	0.735494	-0.214143	0.0918855	0.0197792	-0.107104	0.0669549	0.109675	0.153508	0.35068	0.661572	0.136006	0.234453	0.561846	-0.0663962	0.0727802	0.361604	-0.16532
5	44682589	rs6884702	MRPS30	G	A	0.395	1.03 (1.02-1.04)	5.2e-10	6e-12	0.00428876	0.032868	0.896198	0.197563	0.256995	0.442055	-0.00959073	0.0328919	0.770638	-0.0383729	0.0750716	0.609245	-0.108346	0.109287	0.321496	-0.0239863	0.0326414	0.462528	-0.00846978	0.0331009	0.798074	-0.0386452	0.0683407	0.57175	0.0151644	0.0924303	0.869653	0.00468899	0.066939	0.94415	-0.568603	0.388672	0.143485	0.136164	0.230533	0.554748	0.0828695	0.0730377	0.256531	-0.0642943
5	51791225	rs17261179	ITGA1	T	C	0.515	1.03 (1.02-1.04)	2.9e-11	6.9e-11	-0.0556067	0.0329007	0.0911715	-0.231643	0.264021	0.380287	-0.0209428	0.0329472	0.525085	-0.212681	0.0752118	0.00468802	0.0137572	0.107983	0.89862	-0.0224195	0.0326997	0.49304	0.0338741	0.0331506	0.306999	-0.0304128	0.0683211	0.656225	-0.089347	0.0924122	0.333632	-0.0363126	0.0670798	0.588228	-0.610635	0.3586	0.0885991	0.405087	0.239766	0.0911229	0.0434661	0.072887	0.550941	0.0792207
5	53271420	rs702634	ARL15	A	G	0.689	1.04 (1.02-1.05)	4e-10	1.2e-09	-0.00224406	0.0351913	0.949162	-0.0987135	0.280609	0.725004	0.0208014	0.0352142	0.554787	-0.0845341	0.0794373	0.287275	-0.251941	0.111034	0.0232632	-0.000334128	0.0349536	0.992374	-0.111512	0.0353454	0.00163148	-0.186986	0.0729139	0.0103338	-0.0609822	0.0976067	0.532135	-0.0460817	0.0717461	0.520725	-0.325512	0.34824	0.349926	-0.199515	0.238498	0.402854	-0.091366	0.0786986	0.24567	-0.11036
5	53303595	rs6876198	ARL15	C	T	0.251	1.04 (1.03-1.05)	1.6e-11	1.6e-12	-0.0255833	0.0376332	0.496713	-0.151637	0.310482	0.625272	0.0007235	0.037666	0.984677	-0.0315392	0.0859196	0.71356	-0.300935	0.131443	0.0220522	0.0094355	0.0373831	0.80076	-0.0428887	0.0378919	0.257837	-0.00824691	0.0781074	0.915909	-0.0354987	0.106162	0.738093	0.0329317	0.076713	0.667738	0.177384	0.382687	0.642989	-0.316814	0.288703	0.272479	-0.159479	0.0824465	0.0530718	0.00778958
5	55810305	rs256904	ANKRD55	T	A	0.74	1.08 (1.07-1.10)	4.2e-53	3.6e-67	0.0510079	0.0373377	0.172067	-0.0216539	0.302108	0.942852	0.00581568	0.0373843	0.876393	0.0897464	0.0857903	0.295509	-0.0937999	0.119649	0.43306	0.0133688	0.037103	0.718652	-0.022667	0.0376181	0.546878	0.0226731	0.0776182	0.770202	-0.154882	0.102289	0.129982	-0.0759513	0.0762202	0.319047	-0.965983	0.351992	0.0060634	0.88013	0.342891	0.0102644	0.0136761	0.0826386	0.868561	-0.0478564
5	55840633	rs42251	ANKRD55	A	G	0.304	1.03 (1.02-1.04)	6e-11	7.2e-12	0.053904	0.0347113	0.120614	-0.157974	0.28876	0.584326	0.0723983	0.0347189	0.0371825	-0.0108992	0.0792909	0.890665	0.0416792	0.113512	0.71351	0.0716763	0.0344589	0.037659	-0.0320171	0.0349726	0.360055	-0.0483807	0.0722921	0.503342	0.00387249	0.09792	0.968474	0.022935	0.070749	0.745849	0.614034	0.351514	0.0806675	-0.211832	0.261334	0.417608	0.097934	0.0773864	0.205688	-0.0180744
5	55860866	rs3936510	ANKRD55	T	G	0.189	1.08 (1.07-1.10)	4.2e-38	1.4e-46	-0.0523704	0.0400595	0.19127	-0.194819	0.331731	0.557018	-0.0260868	0.0401034	0.515459	-0.0596385	0.0915893	0.514952	0.210844	0.124937	0.0914921	-0.0279375	0.0398021	0.482825	-0.00411396	0.0403625	0.918827	-0.0833675	0.0834115	0.317566	0.0634536	0.110692	0.566479	-0.00374902	0.0816068	0.96336	0.457286	0.372387	0.219451	-0.495256	0.326702	0.129538	0.0547154	0.0895526	0.541176	0.110861
5	67716793	rs57634870	PIK3R1	G	T	0.149	1.04 (1.03-1.06)	2.6e-12	6e-12	-0.0418396	0.0472066	0.375568	-0.681357	0.476455	0.152701	0.0692574	0.0472243	0.142666	-0.0315061	0.107652	0.769773	0.172271	0.147383	0.242445	0.0150764	0.0468965	0.747882	-0.0380605	0.0475436	0.423502	0.0597395	0.0976266	0.540583	0.0931715	0.129579	0.472103	0.129474	0.0965832	0.180071	-0.53042	0.609572	0.384218	0.0929529	0.322026	0.772851	-0.00842439	0.104534	0.935771	-0.0593775
5	75003678	rs2307111	HMGCR-POC5	T	C	0.604	1.04 (1.03-1.05)	4.3e-12	1.3e-18	0.0249113	0.0334526	0.456565	0.0431883	0.269661	0.872757	0.0553689	0.0334577	0.098117	0.0959263	0.0763953	0.20924	0.114593	0.110002	0.297533	-0.004378	0.0332315	0.895203	-0.00340963	0.0336951	0.91941	-0.0886517	0.0694368	0.201689	-0.106879	0.0932741	0.251856	-0.00449986	0.0681366	0.947288	0.237639	0.361937	0.511453	0.396181	0.246895	0.10857	0.0164282	0.074107	0.824559	-0.103765
5	76435004	rs7732130	ZBED3	G	A	0.301	1.06 (1.05-1.07)	3.1e-20	6e-22	-0.0278719	0.0352458	0.429171	0.0296656	0.280976	0.915903	0.00740559	0.0352777	0.833751	-0.0135281	0.0802166	0.866079	-0.100506	0.11699	0.39029	-0.015947	0.0350117	0.648821	0.0236463	0.0354978	0.505408	-0.0407449	0.0732721	0.578157	0.0259406	0.0985911	0.792427	0.0297918	0.0718306	0.678312	-0.00839212	0.377086	0.982245	0.243432	0.239622	0.309674	-0.132	0.0773904	0.0880751	0.0417272
5	78472599	rs10052346	DMGDH	G	T	0.613	1.04 (1.03-1.05)	4.9e-12	5.7e-14	0.00162553	0.033082	0.960816	-0.533178	0.260414	0.0406157	0.0106841	0.0331057	0.74694	-0.0567867	0.0750944	0.449529	0.10327	0.109463	0.34546	0.00549786	0.0328583	0.867137	0.0533117	0.0332936	0.109491	0.164568	0.0690489	0.0171559	0.107065	0.0935362	0.252358	0.0249046	0.0673716	0.711631	-0.270737	0.342281	0.428963	0.132737	0.236994	0.575421	-0.00680678	0.0733104	0.926061	0.0181884
5	102338739	rs78408340	SLCO6A1-PAM	G	C	0.009	1.51 (1.42-1.60)	1.2e-40	3.1e-45	NA	NA	NA	NA	NA	NA	NA	NA	NA	NA	NA	NA	NA	NA	NA	NA	NA	NA	NA	NA	NA	NA	NA	NA	NA	NA	NA	NA	NA	NA	NA	NA	NA	NA	NA	NA	NA	NA	NA	NA
5	102422968	rs115505614	SLCO6A1-PAM	T	C	0.051	1.19 (1.15-1.22)	4.9e-26	9.3e-28	-0.0245244	0.084657	0.772085	-0.90088	1.0169	0.375666	-0.0382594	0.0847174	0.651601	0.0826485	0.192275	0.667322	-0.122674	0.297965	0.680555	0.00425717	0.0840871	0.959627	0.0397885	0.0852548	0.64077	0.295873	0.173902	0.0888758	-0.318965	0.271111	0.23939	-0.25643	0.1728	0.137817	NA	NA	NA	NA	NA	NA	-0.0935264	0.182911	0.609125	0.0467882
5	103364257	rs186327337	SLCO6A1-PAM	G	A	0.993	1.38 (1.28-1.48)	3.4e-18	7.5e-20	NA	NA	NA	NA	NA	NA	NA	NA	NA	NA	NA	NA	NA	NA	NA	NA	NA	NA	NA	NA	NA	NA	NA	NA	NA	NA	NA	NA	NA	NA	NA	NA	NA	NA	NA	NA	NA	NA	NA	NA
5	122704342	rs4267865	CEP120	G	T	0.961	1.08 (1.05-1.10)	1.9e-12	9.7e-13	0.00611359	0.0910708	0.946485	NA	NA	NA	0.130607	0.0910878	0.151782	-0.122881	0.202632	0.544246	-0.182213	0.279218	0.514014	0.0694449	0.0904412	0.442677	-0.114096	0.0916787	0.213468	-0.197112	0.187058	0.291991	0.352787	0.286134	0.217598	-0.0223191	0.185718	0.904323	0.0904325	1.00226	0.928106	0.862565	1.00581	0.391121	0.00996953	0.201762	0.960592	-0.101762
5	133864599	rs329122	PHFI5	A	G	0.429	1.04 (1.03-1.05)	1.7e-15	6e-16	0.0178386	0.0335588	0.595094	0.176421	0.266358	0.507747	-0.00983656	0.0335856	0.769647	0.103206	0.0763531	0.176471	-3.10005e-05	0.110179	0.999774	0.0142933	0.033333	0.668117	0.0322654	0.0337912	0.339782	-0.00905891	0.0697391	0.896647	-0.214399	0.0958	0.0252215	-0.100912	0.0684109	0.140189	-0.0999452	0.35626	0.779062	-0.0391921	0.236618	0.868444	0.0341792	0.0743389	0.645706	-0.0781756
5	176589585	rs244708	NSD1	G	A	0.433	1.03 (1.02-1.04)	5.4e-09	3.8e-09	0.0310421	0.0327927	0.343959	0.00691603	0.258905	0.978676	0.0412934	0.032811	0.208362	0.0513203	0.0744777	0.490772	0.182721	0.107064	0.0878879	0.0384036	0.0325668	0.238461	0.04234	0.0330187	0.199899	-0.073962	0.0680749	0.27727	0.0938546	0.091886	0.30705	-0.0758438	0.0668276	0.256412	0.661775	0.357395	0.0640731	-0.131174	0.231751	0.571384	0.0515863	0.0727404	0.478181	0.0226906
6	7196323	rs77630070	SSR1-RREB1	G	T	0.81	1.05 (1.04-1.07)	1.1e-11	7.4e-12	-0.000478801	0.0448666	0.991487	0.237088	0.391634	0.544925	-0.0141404	0.0448988	0.752843	0.0102413	0.102056	0.92007	-0.291587	0.137523	0.0339821	-0.0246932	0.0445598	0.579539	0.0208624	0.0451824	0.644325	0.0456451	0.0933138	0.624731	0.189966	0.131035	0.147132	0.108724	0.0912981	0.233705	0.733448	0.613266	0.231707	0.317328	0.348322	0.362284	0.151256	0.0978984	0.122339	0.145293
6	7231843	rs9379084	SSR1-RREB1	G	A	0.888	1.09 (1.07-1.11)	1.2e-26	2.8e-35	0.0545527	0.0487641	0.263412	0.204341	0.430865	0.635315	-0.00737253	0.0488168	0.879973	0.0127044	0.111569	0.909345	0.186848	0.170165	0.272187	0.0559555	0.0484336	0.248117	0.054621	0.0491105	0.266195	0.0307386	0.101487	0.761977	0.0300387	0.138252	0.827993	0.141329	0.0992521	0.154466	0.376088	0.603914	0.533449	0.202649	0.377648	0.591539	0.085608	0.10663	0.422059	0.067581
6	20680678	rs9348441	CDKAL1	A	T	0.272	1.17 (1.15-1.18)	1.5e-188	6.2e-235	0.0122326	0.0372112	0.742394	0.276115	0.280271	0.324534	-0.0141282	0.0372386	0.704437	0.0165227	0.0846171	0.845213	-0.245335	0.127314	0.053977	-0.0296035	0.0369545	0.423189	-0.0842202	0.0374248	0.0245426	-0.0501224	0.0775011	0.517806	-0.154387	0.107314	0.150252	-0.0266315	0.0757737	0.725244	-0.062234	0.398136	0.875786	0.0220648	0.2587	0.932029	-0.080035	0.0818808	0.328341	-0.0251999
6	31139452	rs879882	MHC region	C	T	0.637	1.04 (1.03-1.06)	2e-13	2.3e-17	0.0498623	0.0339108	0.141625	0.0860449	0.27333	0.752911	0.0118535	0.0339549	0.727057	0.108198	0.0778716	0.164699	0.0465655	0.112069	0.677771	0.0131669	0.0337001	0.696059	0.0123388	0.0341704	0.718069	-0.0936907	0.0703166	0.182705	-0.152103	0.0941986	0.106377	-0.0387879	0.0691312	0.574737	-0.390676	0.344523	0.256806	-0.272619	0.231096	0.238134	-0.0632283	0.0754012	0.401687	-0.130818
6	32373378	rs3806155	MHC region	T	A	0.036	1.19 (1.15-1.24)	3e-20	2.2e-22	-0.117832	0.116454	0.311752	NA	NA	NA	-0.191378	0.116488	0.100575	-0.0929918	0.272217	0.732644	-0.131465	0.404985	0.745471	-0.159119	0.11564	0.168993	-0.126996	0.117276	0.279003	-0.181794	0.247747	0.463076	-0.422052	0.380519	0.267365	-0.381788	0.239186	0.110444	NA	NA	NA	NA	NA	NA	-0.290687	0.247173	0.239576	-0.320107
6	32439077	rs7452864	MHC region	C	T	0.708	1.04 (1.02-1.05)	7e-09	1.6e-11	0.0493577	0.0350289	0.158987	-0.381903	0.262378	0.14552	0.00814766	0.0350734	0.816329	0.12316	0.0807006	0.126975	-0.0829615	0.114139	0.467339	0.0155575	0.0348092	0.654974	-0.0280288	0.0352905	0.427165	-0.00852357	0.072714	0.906674	-0.00744224	0.0985767	0.939821	-0.0354926	0.0714024	0.619112	-0.494007	0.352888	0.161543	0.00757663	0.247267	0.975554	-0.0475322	0.0778007	0.541263	-0.00955421
6	33524820	rs62405954	MHC region	T	C	0.924	1.10 (1.08-1.13)	1.4e-14	6.4e-15	-0.0852919	0.0698895	0.222477	-0.357835	0.48405	0.45975	-0.200374	0.0698135	0.00415005	-0.145433	0.154754	0.347339	-0.203431	0.212649	0.338746	-0.191127	0.0693021	0.00587537	0.0153879	0.0704132	0.827035	0.0225023	0.145293	0.87692	-0.595738	0.171451	0.000511462	-0.277177	0.144273	0.0547066	0.731564	1.02763	0.476531	0.25335	0.529715	0.632454	0.0589648	0.153438	0.700761	-0.320256
6	34214670	rs4711389	MHC region	A	G	0.975	1.08 (1.05-1.11)	1.8e-08	3.1e-16	-0.00446053	0.113826	0.968745	-0.957206	0.629226	0.128199	-0.0696236	0.113899	0.541094	0.0248666	0.262852	0.924631	0.0399672	0.384202	0.917148	-0.0527398	0.11305	0.640902	0.0314518	0.114632	0.783829	-0.13592	0.234902	0.562849	-0.0270897	0.322935	0.933157	-0.593807	0.243551	0.0147636	-1.28341	0.770914	0.0959537	0.461288	1.02461	0.65256	-0.323553	0.266051	0.223931	-0.284254
6	38992668	rs2281342	ZFAND3-KCNK16-GLP1R	T	C	0.652	1.03 (1.02-1.05)	1.9e-08	9.4e-10	0.0182771	0.0345016	0.596352	0.28817	0.291136	0.322267	0.00154451	0.03453	0.964328	0.0391952	0.0788516	0.61914	-0.101545	0.11181	0.36379	-0.00777878	0.0342707	0.820464	-0.00426269	0.0347491	0.902381	-0.0667143	0.0715696	0.351257	-0.124357	0.0959717	0.195058	-0.0189788	0.0702733	0.787074	-0.273449	0.355441	0.4417	-0.0351934	0.243211	0.884957	-0.0177122	0.0763971	0.816617	-0.171716
6	39046644	rs742762	ZFAND3-KCNK16-GLP1R	A	C	0.893	1.04 (1.02-1.05)	1.3e-07	2.2e-17	-0.000222208	0.0515247	0.996559	-0.111094	0.413893	0.788375	0.00946757	0.0515627	0.854337	0.00864728	0.118644	0.941896	-0.255835	0.160562	0.111073	0.0123	0.0511759	0.810087	-0.0734016	0.0518622	0.157144	-0.0538725	0.106989	0.614578	-0.0967364	0.143045	0.498883	0.0915464	0.104884	0.382751	-0.673031	0.465028	0.147814	0.305429	0.434258	0.481846	0.0217989	0.112896	0.846887	-0.0110883
6	39284184	rs3734618	ZFAND3-KCNK16-GLP1R	G	A	0.494	1.04 (1.03-1.05)	3.5e-17	2.5e-23	0.00545833	0.0331972	0.869418	0.28429	0.267645	0.288148	0.00490778	0.033222	0.882575	0.0320336	0.0756062	0.671795	0.000704248	0.10912	0.99485	0.00872143	0.0329726	0.79142	0.0292293	0.0334261	0.381991	0.0625256	0.0689067	0.364196	-0.0474083	0.0932618	0.61125	0.047231	0.0676308	0.48495	-0.206705	0.352039	0.557097	0.0135474	0.234512	0.953933	-0.0201359	0.0734832	0.784062	-0.0254436
6	40409243	rs34298980	LRFN2	T	C	0.499	1.03 (1.02-1.04)	6.8e-09	4.1e-09	0.0223496	0.0326047	0.493133	0.0979521	0.26544	0.712124	0.0393553	0.0326203	0.227793	-0.0599857	0.0742787	0.419338	0.0142382	0.106622	0.893744	0.0341368	0.0323788	0.291887	-0.00334879	0.0328402	0.91879	0.0273719	0.0676686	0.685836	-0.0107789	0.0915263	0.906249	-0.0734194	0.0664464	0.269182	-0.121554	0.351647	0.729589	0.508641	0.237135	0.0319575	0.0225537	0.0721756	0.754625	0.133954
6	43758873	rs6905288	VEGFA	A	G	0.564	1.04 (1.03-1.05)	9.7e-11	7.1e-11	-0.0431378	0.0332648	0.194862	0.318057	0.273112	0.244193	0.00727479	0.0333044	0.827116	0.00108259	0.0757661	0.988604	-0.00863263	0.109039	0.93687	-0.00177444	0.0330552	0.957195	0.00240287	0.0335162	0.942854	-0.0553969	0.0690881	0.422655	0.0123854	0.0935399	0.894659	-0.0905626	0.0678843	0.182162	0.0533248	0.349906	0.878873	0.00625754	0.233675	0.978635	-0.0687982	0.0738865	0.351798	-0.0646448
6	43814190	rs6458354	VEGFA	C	T	0.289	1.04 (1.03-1.06)	6.2e-13	4.9e-14	-0.025941	0.0369606	0.482858	0.468621	0.274099	0.0873253	0.0175527	0.0369909	0.63519	0.103468	0.0835308	0.215462	-0.0362388	0.122402	0.767183	0.0223826	0.0367122	0.54215	0.000262488	0.037228	0.994375	-0.0444285	0.0768097	0.56298	0.139501	0.102013	0.171476	0.0267588	0.0753341	0.722459	-0.253675	0.411554	0.537643	0.0561724	0.259653	0.828732	-0.105796	0.0812822	0.193054	0.0903616
6	50788778	rs3798519	TFAP2B	C	A	0.189	1.06 (1.05-1.07)	2.3e-21	2.4e-22	-0.0026852	0.0425497	0.949688	0.459435	0.306186	0.133481	-0.0116417	0.0425806	0.784574	-0.0052397	0.0968196	0.956839	-0.129069	0.14349	0.368387	-0.0387641	0.0422526	0.359035	0.0521668	0.0428344	0.22343	-0.0513701	0.0885243	0.561718	-0.00757462	0.119371	0.949407	-0.00800697	0.086644	0.92637	-0.926672	0.613821	0.131126	0.194052	0.286966	0.498905	0.128367	0.0958497	0.180502	-0.0591578
6	107433400	rs1665901	BEND3	A	T	0.658	1.04 (1.03-1.05)	1.6e-11	6.1e-12	0.0339471	0.0353949	0.337637	-0.273692	0.270896	0.312338	0.0352697	0.0354206	0.319508	0.00428818	0.0807452	0.957646	0.0241728	0.116399	0.835482	0.0273523	0.0351589	0.436691	-0.0169682	0.0356529	0.634182	0.0637985	0.0737697	0.38713	-0.0212232	0.0994897	0.831104	0.0276775	0.0720728	0.700965	-0.137499	0.373259	0.712598	0.335439	0.271777	0.217112	-0.0543461	0.0785838	0.489201	-0.0271676
6	118011723	rs72951506	NUS1	C	T	0.847	1.04 (1.03-1.06)	4.8e-11	9.9e-11	0.0309802	0.0453871	0.494959	0.162899	0.390157	0.676298	0.0231539	0.0454235	0.610299	0.0485549	0.104304	0.641559	0.141853	0.154683	0.359115	0.0202109	0.0450838	0.653992	-0.0551498	0.0456969	0.227641	-0.0680231	0.0940981	0.469732	0.000981481	0.127834	0.993875	0.0248143	0.0924284	0.788334	0.261664	0.534726	0.6246	0.453877	0.378714	0.230734	0.0599698	0.0996351	0.547246	-0.000369932
6	126792095	rs11759026	CENPW-SOGA3	G	A	0.232	1.07 (1.06-1.08)	1e-28	8.9e-35	-0.0424003	0.0386422	0.272675	0.211565	0.293927	0.471652	0.0734756	0.0386457	0.057424	-0.0579586	0.0883634	0.511882	-0.260228	0.13335	0.0510018	0.017784	0.0383916	0.643257	-0.0522715	0.0389102	0.179312	-0.140321	0.0808908	0.0827951	-0.0273846	0.108791	0.801261	-0.0472897	0.078686	0.547845	0.0382587	0.402085	0.924201	-0.0371319	0.271599	0.891254	0.0140804	0.0858353	0.869704	-0.126481
6	127416930	rs2800733	CENPW-SOGA3	A	G	0.717	1.05 (1.04-1.06)	6.9e-16	1.7e-16	-0.0380092	0.0373212	0.308606	0.126569	0.307586	0.680712	-0.0241457	0.0373553	0.518114	-0.053427	0.0844772	0.527111	-0.124277	0.119742	0.299329	-0.0524914	0.0370593	0.156824	-0.0182487	0.0375943	0.627442	-0.0339762	0.0773295	0.660422	0.09201	0.10595	0.38516	0.0202854	0.0760122	0.789572	0.0811255	0.399531	0.839094	-0.0962098	0.255117	0.706093	0.108755	0.0821638	0.185622	0.297607
6	131954797	rs7739842	MED23-ENPP3	G	T	0.197	1.04 (1.03-1.05)	9.2e-12	1.8e-13	-0.0418574	0.04084	0.30554	0.321663	0.30115	0.28547	-0.000971089	0.0408822	0.981052	-0.101864	0.0944717	0.280922	-0.302007	0.144983	0.0372463	-0.0527935	0.0405571	0.193179	0.000378389	0.0411417	0.992663	0.123942	0.0844913	0.142412	-0.0734743	0.116907	0.529688	0.0195575	0.0832278	0.81422	0.244521	0.410372	0.551275	-0.624485	0.357774	0.0809027	-0.0358987	0.0899569	0.689842	-0.0607218
6	137291281	rs6937795	SLC35D3	A	C	0.527	1.04 (1.03-1.05)	6.6e-13	5.3e-15	-0.0117931	0.0324872	0.716642	-0.00919757	0.263864	0.972199	-0.0271496	0.0325064	0.40371	-0.0718275	0.0740408	0.332014	-0.110494	0.10658	0.299873	0.00232824	0.0322688	0.942489	-0.0930778	0.0326467	0.00440606	-0.113418	0.0675339	0.0930819	-0.0225537	0.0912641	0.804832	-0.108711	0.0662632	0.100878	0.200788	0.35002	0.566206	-0.0486092	0.231416	0.833644	0.107459	0.0719028	0.135043	-0.104585
6	138855975	rs9376353	REPS1	A	T	0.424	1.03 (1.02-1.04)	1.2e-09	2.7e-10	-0.0328657	0.0328657	0.317443	0.0507026	0.266258	0.848974	-0.0265412	0.0328933	0.419837	-0.0706725	0.0747978	0.344736	-0.192458	0.108229	0.075365	-0.0349625	0.0326424	0.284276	0.00290845	0.0331079	0.930007	0.0168964	0.0681556	0.804235	0.0744858	0.091732	0.416768	0.0663681	0.0670073	0.321944	-0.422272	0.362528	0.2441	-0.397248	0.239952	0.0978173	-0.149207	0.0728795	0.0406275	-0.0313803
6	143058692	rs6570526	HIVEP2	G	C	0.516	1.03 (1.02-1.04)	3.1e-10	8.2e-10	-0.00631418	0.0328193	0.847456	-0.197079	0.257256	0.443629	0.00427209	0.0328439	0.896523	0.023371	0.0747056	0.754404	-0.128587	0.107398	0.231203	-0.00724714	0.0325975	0.824088	-0.0402902	0.0330392	0.222824	-0.0349037	0.0681713	0.608628	0.0634852	0.0923879	0.491981	0.0294844	0.0668419	0.659131	0.157747	0.348848	0.651129	-0.00432065	0.230756	0.985049	-0.00151885	0.0726732	0.983352	-0.118423
6	153438573	rs6932473	RGS17	T	A	0.316	1.04 (1.03-1.05)	1.4e-12	5.5e-13	-0.0068826	0.0349687	0.843989	-0.164214	0.292214	0.574139	0.00212065	0.0349951	0.951686	-0.00520955	0.0794692	0.947736	-0.011152	0.114484	0.922397	0.00519494	0.0347326	0.881121	0.000851257	0.0352172	0.980718	0.0731203	0.0724026	0.312517	0.0222017	0.0973886	0.819666	0.0275665	0.0712743	0.698881	-0.228044	0.385163	0.553801	-0.0646911	0.251303	0.796852	-0.0584038	0.0772572	0.44967	-0.098801
6	160770360	rs539298	SLC22A3	A	G	0.516	1.04 (1.03-1.05)	4.6e-15	1.4e-15	0.0319459	0.032442	0.324897	-0.0379122	0.259101	0.88366	0.0029421	0.0324747	0.927823	-0.0366405	0.0736397	0.618797	0.142025	0.10618	0.181032	0.0254392	0.0322259	0.429979	0.00337973	0.0326809	0.917644	-0.0109696	0.0672813	0.870513	0.10905	0.0910998	0.231293	0.0329189	0.0660979	0.618458	0.418391	0.35113	0.233437	-0.0545166	0.226183	0.809544	0.0438923	0.0719463	0.541813	0.0877848
6	164133001	rs4709746	QKI	C	T	0.869	1.05 (1.03-1.06)	4.4e-10	7.8e-10	0.00092411	0.0481601	0.984693	0.470138	0.467266	0.314344	0.00756628	0.0481957	0.875269	0.0408751	0.109976	0.710137	-0.0194104	0.155547	0.900673	-0.0371876	0.0478269	0.436937	-0.0214708	0.0484994	0.658033	0.146368	0.100936	0.147029	-0.215506	0.127223	0.0902784	-0.220957	0.0994055	0.0262312	-0.310517	0.442523	0.482865	0.464674	0.398682	0.243805	-0.00726356	0.107171	0.945955	-0.116992
7	13887008	rs12154701	ETV1	A	C	0.445	1.03 (1.02-1.04)	1.2e-10	1.4e-11	0.00115524	0.0326274	0.971759	-0.308086	0.267309	0.249097	0.00758989	0.0326513	0.816212	0.083955	0.0742484	0.258143	-0.0682285	0.107773	0.526682	-0.00340242	0.032407	0.916395	-0.0629447	0.0328262	0.0553275	0.0230034	0.0676884	0.733967	0.0580519	0.0915652	0.526062	-0.0291961	0.0664624	0.660454	-0.0112986	0.343091	0.97373	-0.461356	0.241962	0.056555	-0.0134845	0.0721885	0.851822	-0.0906087
7	14898282	rs17168486	DGKB	T	C	0.18	1.06 (1.05-1.07)	7.3e-23	5.9e-30	-0.0110962	0.0439044	0.800501	-0.249047	0.388491	0.521481	-0.0475116	0.0439239	0.279537	0.0327672	0.099631	0.742211	0.0354733	0.142763	0.803771	-0.0257736	0.0436044	0.554542	-0.0408103	0.0442065	0.356038	-0.000258033	0.0912388	0.997744	-0.123238	0.126726	0.330814	-0.0973968	0.089346	0.275666	0.293654	0.42615	0.490772	0.392758	0.283518	0.165963	-0.0175715	0.0970205	0.85628	-0.0765096
7	15062983	rs2215383	DGKB	C	T	0.538	1.07 (1.06-1.08)	2.9e-35	1.6e-45	-0.0494514	0.0332142	0.136695	0.104875	0.271345	0.699125	-0.0299482	0.0332517	0.367891	-0.00620074	0.0755629	0.934565	0.0164973	0.108659	0.879326	-0.0205586	0.0330063	0.533447	0.00116246	0.0334701	0.972298	0.0431821	0.0689684	0.531236	0.0657339	0.0933723	0.481436	0.0128056	0.0676965	0.849968	-0.245609	0.353725	0.48746	-0.262918	0.235584	0.264416	0.0378639	0.0735507	0.606697	0.026574
7	28192280	rs849133	JAZF1	C	T	0.506	1.05 (1.04-1.06)	5.8e-22	3.6e-26	0.0376538	0.0318689	0.237548	0.263947	0.262465	0.314584	-0.029409	0.0318974	0.356656	0.0348865	0.0726659	0.631156	0.0464534	0.104831	0.657673	-0.00551575	0.0316654	0.861736	0.0135405	0.0321057	0.67326	0.0966354	0.0662363	0.14458	-0.036004	0.0894787	0.687406	-0.0548858	0.0649657	0.39819	-0.163079	0.338172	0.629643	0.0190493	0.226985	0.933119	-0.0395764	0.070566	0.57487	0.0570223
7	28205303	rs552707	JAZF1	T	C	0.295	1.03 (1.02-1.04)	1.2e-18	1e-23	0.00877349	0.0364491	0.809811	-0.283579	0.318389	0.373107	-0.00369836	0.0364768	0.919252	0.0164244	0.0828277	0.842769	0.0936998	0.117391	0.424761	-0.0045795	0.0362034	0.899355	-0.066586	0.0366755	0.0696034	0.095601	0.0754652	0.205202	-0.098258	0.103739	0.343555	-0.126673	0.0742749	0.0881088	-0.427674	0.428142	0.317841	-0.312744	0.278179	0.260905	-0.0782632	0.0802651	0.329531	-0.0348285
7	28214614	rs10226758	JAZF1	C	A	0.349	1.04 (1.04-1.05)	8.2e-27	7.8e-44	-0.00538412	0.0351421	0.87825	0.246341	0.301794	0.414354	0.00866827	0.035168	0.805337	-0.0141987	0.0798336	0.858872	-0.0760625	0.113406	0.502409	0.00112416	0.034905	0.974311	0.0610652	0.0353631	0.0843707	-0.0854343	0.0727936	0.240526	0.137974	0.100456	0.169602	0.11629	0.0716003	0.104343	0.557252	0.426369	0.191223	0.173503	0.25717	0.49989	0.0640618	0.0775212	0.408592	0.0283995
7	30728452	rs917195	CRHR2	C	T	0.771	1.05 (1.04-1.06)	9e-16	3.6e-16	-0.0171244	0.0382832	0.654705	-0.0658252	0.297182	0.824701	0.0305199	0.0383072	0.42572	-0.0587499	0.086549	0.497244	-0.257027	0.119885	0.0320377	0.0290485	0.0380206	0.444954	-0.0458896	0.0385422	0.233952	-0.0752281	0.079186	0.342093	-0.0908639	0.105885	0.390838	0.0567312	0.0779312	0.466631	-0.17905	0.3866	0.643268	0.15883	0.281105	0.572059	-0.028257	0.0850173	0.739606	0.0156092
7	44178829	rs882019	GCK	G	A	0.455	1.03 (1.02-1.04)	1.7e-07	4.8e-09	0.0404401	0.0320042	0.20654	-0.0786136	0.257302	0.759964	0.0349983	0.0320316	0.274706	0.0538251	0.0726675	0.458891	0.118583	0.104034	0.254333	0.0277639	0.0317953	0.382665	0.0505498	0.0322238	0.116889	0.000389924	0.0664161	0.995344	0.0428008	0.0893815	0.63207	-0.0040773	0.0652062	0.950139	0.163377	0.330949	0.621542	0.161447	0.22129	0.465658	0.0205083	0.071063	0.77289	0.0819486
7	44255643	rs878521	GCK	A	G	0.243	1.04 (1.03-1.06)	5e-15	4.2e-18	0.0300873	0.0376393	0.424185	0.170544	0.285939	0.550886	0.0344245	0.0376653	0.36086	0.100406	0.0851313	0.238238	0.0423792	0.123289	0.731018	0.0365004	0.0373818	0.328984	-0.0216741	0.0379097	0.567575	-0.0272325	0.0783794	0.728255	-0.131714	0.109089	0.227277	-0.0133254	0.0766494	0.861985	0.663512	0.361382	0.0663511	0.46102	0.246338	0.0612764	0.0859483	0.0838913	0.305576	-0.0200854
7	50809085	rs13236710	GRB10	G	A	0.897	1.05 (1.03-1.07)	1.1e-10	2e-11	0.0739401	0.0544136	0.174361	-0.316605	0.38749	0.413891	0.0687902	0.0544579	0.206685	0.0174168	0.124996	0.889184	0.0702508	0.185013	0.704163	0.0786931	0.0540421	0.145523	0.0514315	0.0548143	0.348221	0.0918291	0.114015	0.420583	0.108242	0.158239	0.493947	0.072432	0.11076	0.513143	-0.159888	0.540768	0.767478	0.090762	0.40323	0.821911	0.171538	0.117704	0.145013	0.239168
7	69055951	rs2533457	AUTS2	G	A	0.346	1.04 (1.03-1.05)	2e-15	3.3e-19	-0.0151555	0.0349024	0.664176	0.167216	0.274485	0.542397	-0.0288472	0.0349238	0.408908	-0.0425391	0.0797009	0.593527	-0.0813923	0.115251	0.480054	-0.0173558	0.0346661	0.616673	-0.0186567	0.0351493	0.595632	0.0367272	0.0724212	0.612091	-0.0850123	0.0988798	0.389924	0.0887524	0.0712018	0.212597	0.043701	0.366421	0.905071	0.187831	0.239763	0.433385	0.0281306	0.0774273	0.716351	-0.0381236
7	89800241	rs6978118	STEAP1	A	T	0.539	1.03 (1.02-1.04)	7.8e-11	2e-14	0.0188065	0.0324992	0.562879	-0.0942369	0.26281	0.719917	-0.00760436	0.032526	0.815171	0.0627928	0.0741423	0.397034	0.128106	0.107321	0.232604	0.00163497	0.0322826	0.959614	-0.0192822	0.0327298	0.555844	0.04492	0.0675014	0.505751	0.0259293	0.0912597	0.776314	-0.119586	0.0663323	0.0714085	-0.21146	0.34438	0.539188	-0.0630687	0.232124	0.785864	-0.0308104	0.0719532	0.668516	-0.149437
7	102481891	rs7781557	FBXL13-RELN-RASA4	C	T	0.818	1.05 (1.04-1.07)	9e-12	8.9e-12	0.045133	0.0424642	0.287991	0.38084	0.385984	0.323804	0.0114288	0.0425082	0.788067	0.104486	0.0981003	0.286833	0.174544	0.145192	0.229302	0.027761	0.0421854	0.510575	0.0296748	0.0427732	0.487914	0.0611416	0.0884896	0.489598	0.118871	0.122237	0.330817	-0.0608128	0.0866141	0.482585	0.116719	0.464824	0.801734	0.258887	0.323524	0.423589	0.0628503	0.0933877	0.500947	0.0754523
7	127250831	rs12669223	GCC1-PAX4-LEP	A	G	0.002	1.21 (1.17-1.25)	1.1e-34	2.4e-39	NA	NA	NA	NA	NA	NA	NA	NA	NA	NA	NA	NA	NA	NA	NA	NA	NA	NA	NA	NA	NA	NA	NA	NA	NA	NA	NA	NA	NA	NA	NA	NA	NA	NA	NA	NA	NA	NA	NA	NA
7	130457914	rs1562396	KLF14	G	A	0.32	1.04 (1.03-1.05)	7.7e-14	1.7e-16	-0.0397244	0.0346296	0.251481	-0.61215	0.319801	0.0555999	-0.00906628	0.0346672	0.793719	-0.0757909	0.0794716	0.340245	0.0126102	0.113625	0.911649	-0.0504488	0.0343879	0.142534	0.0260851	0.0348826	0.454678	0.0949465	0.0718279	0.186225	0.127117	0.0962852	0.186765	0.0257165	0.0705799	0.715629	0.596047	0.353465	0.0917371	-0.307369	0.261781	0.240337	-0.136481	0.0761198	0.0729772	0.119089
7	140631823	rs11983228	BRAF	C	G	0.072	1.05 (1.04-1.07)	2.7e-10	5e-10	-0.100537	0.0609284	0.0990981	-0.876524	0.724858	0.226572	-0.0431047	0.0610108	0.479961	-0.247064	0.14563	0.0897882	-0.433192	0.229596	0.0591928	-0.0425659	0.0605536	0.482179	0.0313561	0.061402	0.609645	0.031644	0.126125	0.801924	0.20902	0.160798	0.193637	0.106034	0.124706	0.395177	0.477271	0.533515	0.37101	-0.246545	0.46809	0.598399	-0.269042	0.130445	0.0391603	-0.191141
7	150537635	rs62492368	AOC1	A	G	0.312	1.03 (1.02-1.04)	4e-10	1.5e-10	-0.0267644	0.0347699	0.441542	-0.363078	0.303239	0.231176	0.0343909	0.0347922	0.323055	-0.0576058	0.0794876	0.468629	-0.0247252	0.114301	0.828739	0.0300163	0.0345335	0.384856	-0.0626146	0.0349918	0.0737144	0.0369585	0.0720638	0.608037	0.102629	0.0964426	0.287249	0.0186745	0.0708459	0.792129	0.400325	0.353082	0.256875	-0.416088	0.270796	0.124406	0.118441	0.0777294	0.127569	0.0946827
7	156794983	rs887609	MNX1	A	G	0.218	1.03 (1.02-1.04)	6.9e-06	3.2e-10	0.0055383	0.0410162	0.892605	0.483561	0.287004	0.0920167	0.014167	0.0410457	0.730019	0.0284708	0.093094	0.759697	0.17828	0.130079	0.170508	0.0421616	0.0407275	0.300706	-0.0486549	0.0412919	0.238824	-0.0609918	0.0854149	0.47519	0.149876	0.111968	0.180721	0.212641	0.0843952	0.0117491	0.0812942	0.418213	0.845877	0.110673	0.281296	0.693994	0.102367	0.0920164	0.265924	0.124445
7	156992461	rs2366214	MNX1	A	G	0.662	1.05 (1.04-1.07)	4.9e-24	3.3e-26	0.0192508	0.0339876	0.571187	-0.253285	0.26818	0.34493	0.0114922	0.0340149	0.73551	0.0974342	0.078014	0.211688	0.237798	0.115344	0.0392413	0.00788191	0.0337605	0.815426	0.0112155	0.0342309	0.743219	0.112267	0.0708791	0.113213	0.118495	0.0968516	0.221149	0.0328094	0.0692227	0.635522	0.324188	0.384298	0.398901	0.575112	0.269983	0.0331571	0.104996	0.0748451	0.160662	0.0776881
8	10787612	rs4240673	MSRA-XKR6	T	C	0.45	1.04 (1.03-1.05)	5.3e-11	1.1e-11	-0.0563297	0.0325178	0.0833932	-0.323329	0.26893	0.229256	-0.00905816	0.032568	0.780943	-0.0730106	0.0742886	0.325711	-0.1323	0.107319	0.217661	-0.0314357	0.0323163	0.330805	0.00779388	0.0327749	0.812063	-0.0293052	0.0676242	0.664763	0.0510258	0.0916395	0.577662	0.031111	0.066291	0.63881	0.170198	0.349115	0.625892	-0.13784	0.232066	0.552533	-0.054472	0.0719164	0.448789	0.0947646
8	12618225	rs12680692	LONRF1	A	T	0.321	1.03 (1.02-1.04)	1.4e-08	6.3e-10	-0.0343257	0.036351	0.345149	-0.253005	0.30834	0.411909	-0.0604397	0.0363596	0.0966278	-0.0862248	0.0832697	0.300442	0.0345753	0.117536	0.768612	-0.0407302	0.0361017	0.25938	0.0428222	0.0366043	0.242205	0.171421	0.0753267	0.0228645	-0.131973	0.104	0.204453	-0.0398423	0.0740341	0.590469	-0.510906	0.434494	0.23965	0.224319	0.246059	0.361963	-0.0944843	0.0800576	0.237917	-0.207467
8	19844415	rs7819706	LPL	A	G	0.884	1.05 (1.04-1.07)	2.1e-11	4.3e-13	-0.0419191	0.050091	0.402781	-0.116912	0.383416	0.760423	0.0107436	0.0501373	0.83035	-0.131765	0.111932	0.239116	-0.155764	0.157613	0.323009	-0.0144417	0.049761	0.77168	0.00688649	0.0504559	0.891453	-0.160153	0.103294	0.121031	0.112311	0.144815	0.438013	-0.149385	0.102653	0.145598	-0.639229	0.432121	0.139064	-0.212649	0.332785	0.522829	-0.200129	0.114583	0.0807075	0.0291199
8	36854711	rs10092900	KCNU1	G	T	0.172	1.04 (1.03-1.05)	1.2e-11	3.1e-13	-0.0607893	0.0404558	0.133111	-0.47797	0.382839	0.211852	-0.044351	0.0404976	0.273594	-0.115422	0.0937979	0.218493	-0.0237181	0.134011	0.859517	-0.0346979	0.0401991	0.388166	0.0531937	0.0407491	0.191921	0.0278486	0.0838511	0.739809	0.0903616	0.111191	0.416416	-0.00511003	0.0824687	0.950595	-0.0202547	0.422857	0.961796	0.255161	0.268004	0.341063	-0.0757316	0.0889736	0.394678	0.0552928
8	37397803	rs12680217	KCNU1	T	C	0.934	1.05 (1.04-1.07)	6.3e-12	1.5e-15	0.0229916	0.0665345	0.729714	-0.434351	0.420609	0.301761	0.00147999	0.0665863	0.98227	0.00943033	0.152365	0.950646	-0.329599	0.198047	0.0960647	0.0107988	0.0660868	0.870219	0.0332628	0.0670045	0.619653	0.038929	0.138897	0.779269	0.161648	0.198525	0.415506	-0.0383165	0.135633	0.777555	-0.352908	0.601011	0.557075	0.934511	0.715832	0.191726	-0.108182	0.149841	0.470322	-0.257777
8	41510260	rs12550613	ANK1	C	G	0.586	1.04 (1.03-1.05)	2.1e-15	1.1e-18	0.00522552	0.0330229	0.874286	0.228612	0.264747	0.387856	-0.0324323	0.0330391	0.32641	0.0242876	0.0752502	0.746875	-0.0172209	0.108042	0.873394	-0.0124082	0.0327988	0.705242	0.000359129	0.0332575	0.991385	0.0462701	0.0686342	0.500209	-0.0946008	0.0927625	0.307793	-0.0390284	0.0672519	0.561702	-0.0512443	0.352176	0.884303	-0.754642	0.236739	0.00143433	-0.0347492	0.0731166	0.634614	-0.0491901
8	41522991	rs508419	ANK1	G	A	0.764	1.05 (1.04-1.07)	2.7e-20	6.4e-23	0.0144197	0.0372156	0.698457	0.608992	0.347427	0.079625	0.00393711	0.0372448	0.915825	-0.0400473	0.0846094	0.635964	0.0679052	0.124316	0.584905	0.0416959	0.0369529	0.259319	0.0245324	0.0374769	0.512807	-0.0110586	0.077299	0.886226	-0.0588914	0.104244	0.57212	0.0675971	0.0757616	0.372265	-0.0535123	0.396985	0.892771	-0.256965	0.250779	0.305523	-0.0170832	0.0823305	0.835665	-0.151166
8	75147209	rs3780012	GDAP1	C	G	0.01	1.14 (1.09-1.19)	1.5e-09	8e-10	NA	NA	NA	NA	NA	NA	NA	NA	NA	NA	NA	NA	NA	NA	NA	NA	NA	NA	NA	NA	NA	NA	NA	NA	NA	NA	NA	NA	NA	NA	NA	NA	NA	NA	NA	NA	NA	NA	NA	NA
8	95965695	rs13257021	TP53INP1	A	G	0.485	1.04 (1.03-1.05)	3.7e-18	3.3e-20	0.00674823	0.0321561	0.833801	0.200824	0.259425	0.438864	0.0202284	0.032177	0.529649	0.106601	0.0732072	0.145339	0.0556996	0.105427	0.597271	0.0309343	0.0319311	0.332781	-0.0313686	0.0323764	0.332737	0.041046	0.0667239	0.538428	0.0116024	0.0901317	0.897561	-0.0144164	0.0655043	0.825803	0.0793378	0.338232	0.814551	0.213788	0.228203	0.348844	0.0849384	0.0713446	0.233854	-0.0696652
8	116497173	rs800909	TRPS1	T	C	0.446	1.03 (1.02-1.04)	1.9e-10	8.1e-12	0.0087553	0.032243	0.786006	-0.369193	0.273843	0.177597	0.0163349	0.0322655	0.61273	0.0158143	0.0735685	0.829796	-0.155937	0.107307	0.146173	0.0160892	0.0320237	0.615434	0.0101426	0.0324717	0.754807	-0.0159587	0.0670401	0.811846	-0.00810576	0.0908304	0.92889	0.00420116	0.0656776	0.94894	0.253036	0.343944	0.461912	-0.269449	0.238671	0.258915	-0.142247	0.0711842	0.0456852	-0.0220943
8	118184783	rs13266634	SLC30A8	C	T	0.685	1.12 (1.11-1.13)	3e-101	3.2e-115	0.00198813	0.0355169	0.955366	-0.476352	0.269997	0.0776839	-0.00297446	0.0355433	0.933316	-0.0378448	0.0805399	0.638392	-0.181755	0.113293	0.108652	-0.00210191	0.035277	0.952494	-0.0318215	0.0357613	0.373674	0.0163713	0.0737848	0.824409	0.0472205	0.100262	0.637662	-0.0108806	0.0723636	0.88049	0.00895901	0.376791	0.981031	-0.21146	0.242798	0.383797	-0.0435096	0.0789433	0.581562	0.0580254
8	129569999	rs4733612	PVT1	G	A	0.267	1.04 (1.03-1.06)	1.5e-11	2.4e-12	-0.00950034	0.0362988	0.793562	0.724093	0.266863	0.0066605	-0.0342563	0.0363177	0.345682	0.0271189	0.0824281	0.742188	0.0538914	0.117733	0.647116	-0.00891789	0.0360536	0.804665	0.0297978	0.0365505	0.415035	-0.0147127	0.0754439	0.845378	-0.0318684	0.102592	0.756081	-0.0182719	0.0739178	0.804758	0.719585	0.354122	0.0421514	-0.0571314	0.259608	0.825819	-0.00259637	0.0802998	0.974208	-0.138033
8	145544720	rs3890400	BOP1	A	G	0.375	1.04 (1.03-1.06)	8.9e-15	1.8e-18	0.0232065	0.0328664	0.480224	0.442857	0.253844	0.0810553	-0.00208958	0.0328953	0.949358	-0.0629856	0.0750562	0.401366	0.00752164	0.107528	0.944197	-0.01516	0.0326469	0.642444	0.0373163	0.0330927	0.259624	-0.0117872	0.0682559	0.862889	0.0422642	0.0919108	0.645655	0.0399993	0.0669948	0.550519	0.367708	0.334171	0.271177	-0.336308	0.24468	0.169292	-0.102441	0.0725425	0.157905	0.0319249
8	145972670	rs7014773	BOP1	T	C	0.545	1.03 (1.02-1.04)	2.8e-09	4e-09	-0.00730726	0.0327016	0.823208	-0.0995919	0.261303	0.703101	0.0609648	0.0326954	0.0623934	-0.0185666	0.0743153	0.802697	-0.0430212	0.106461	0.686112	0.0428244	0.0324657	0.187313	0.00615716	0.0329338	0.851716	-0.142619	0.0679374	0.0357982	-0.0587216	0.0915691	0.521354	-0.00878133	0.0665994	0.895156	0.293168	0.357023	0.411563	0.147969	0.232502	0.524503	-0.0691062	0.0725653	0.340934	-0.0507692
9	4290085	rs4237150	GLIS3	C	G	0.416	1.05 (1.04-1.06)	4.4e-20	2.3e-26	0.0144104	0.0327821	0.660292	0.0974261	0.266979	0.715173	0.0348476	0.0327981	0.288155	-0.0344631	0.07492	0.645518	-0.103497	0.108505	0.340162	0.00859485	0.0325617	0.791844	-0.00187044	0.0330165	0.954829	0.124472	0.0681434	0.0677627	0.215579	0.0917911	0.018846	0.0614619	0.0668179	0.357627	-0.219783	0.358391	0.539713	-0.0491356	0.235798	0.834933	0.0472938	0.0725702	0.514633	0.0465877
9	4297892	rs4258054	GLIS3	T	C	0.722	1.03 (1.02-1.05)	1.4e-09	5.7e-10	0.0165838	0.0362645	0.647508	-0.0175747	0.290049	0.951692	0.048247	0.0362762	0.183686	0.0487534	0.0828891	0.556412	-0.0135774	0.11792	0.908338	0.034687	0.0360125	0.335578	-0.00593316	0.0365238	0.870972	0.0578029	0.0755241	0.444058	0.00933544	0.101848	0.926965	0.0269581	0.073841	0.715052	0.143279	0.396891	0.718095	0.783678	0.323804	0.015511	0.024761	0.080193	0.757501	0.0279531
9	19074538	rs12380322	HAUS6	G	A	0.394	1.03 (1.02-1.04)	9.5e-10	4.9e-10	0.0230597	0.0332572	0.488162	-0.130709	0.267994	0.625738	-0.0205906	0.0332829	0.536221	-0.00539855	0.0754741	0.942977	0.0330188	0.107957	0.759711	0.00865245	0.0330363	0.793422	-0.0257306	0.0334923	0.442434	0.0804272	0.0689971	0.243762	-0.112502	0.093551	0.229143	0.0936178	0.0678473	0.167643	0.0586462	0.348687	0.866433	-0.225167	0.235629	0.339274	-0.0761081	0.0737114	0.301829	-0.0837491
9	21840834	rs7856455	CDKN2A-CDKN2B	G	T	0.959	1.04 (1.03-1.06)	8.9e-07	1.1e-09	0.0997217	0.0771855	0.196529	-0.625179	0.479737	0.192517	-0.0505895	0.0772692	0.512731	0.135191	0.179702	0.451868	0.430658	0.294956	0.144268	-0.0101014	0.0766986	0.895235	0.027008	0.0777662	0.728407	0.13459	0.161631	0.405014	0.0536508	0.218195	0.805773	-0.108011	0.158162	0.49468	-0.622006	0.606471	0.305072	-0.0577688	0.523989	0.912215	0.0928436	0.169048	0.582858	-0.212535
9	22133984	rs10757282	CDKN2A-CDKN2B	C	T	0.43	1.08 (1.07-1.09)	1.4e-69	4e-84	0.0109844	0.0330045	0.739311	-0.106921	0.266095	0.68782	0.0281574	0.0330236	0.393967	-0.0741838	0.0752243	0.324048	-0.0871768	0.108539	0.421866	0.00289857	0.0327825	0.929554	-0.0663862	0.0332036	0.0457159	-0.0810539	0.068581	0.237259	0.0743187	0.0922756	0.420603	-0.0961618	0.0672898	0.152985	0.12471	0.346396	0.718823	-0.294697	0.239393	0.218314	0.0272844	0.0731878	0.709282	0.00177842
9	22134094	rs10811661	CDKN2A-CDKN2B	T	C	0.83	1.17 (1.16-1.18)	2.2e-200	1.4e-269	-0.0312019	0.0416753	0.45414	0.496022	0.401995	0.217239	0.00827777	0.0417123	0.842716	0.133629	0.0972316	0.169339	-0.197982	0.130703	0.129834	-0.0133866	0.041399	0.746462	0.00278196	0.0419775	0.947168	0.0427332	0.0868669	0.622761	0.062796	0.119065	0.597907	0.0276498	0.0848643	0.744568	-0.171311	0.425641	0.687338	0.494706	0.358199	0.167251	0.161154	0.0905641	0.0751665	0.00783259
9	22301092	rs1575972	CDKN2A-CDKN2B	T	A	0.966	1.10 (1.07-1.12)	5.2e-15	1.1e-17	-0.101183	0.0876633	0.248561	0.127479	0.735184	0.862339	0.045382	0.0877541	0.605114	-0.076081	0.195726	0.697496	0.472623	0.335961	0.159493	0.020393	0.0871014	0.814911	-0.0594112	0.0883067	0.501171	-0.0392784	0.181315	0.828507	-0.205045	0.229813	0.372275	-0.164539	0.18008	0.360874	0.363866	1.02319	0.722125	1.2629	1.01783	0.21469	-0.0697779	0.197956	0.724469	0.0692215
9	28410683	rs1412234	LINGO2	C	T	0.326	1.03 (1.02-1.05)	1e-09	1.5e-11	0.00192695	0.0350877	0.95621	0.262357	0.272639	0.335907	0.015357	0.0351121	0.661893	-0.0319872	0.0801762	0.689927	0.0786263	0.114105	0.490758	0.00472641	0.0348506	0.892137	-0.0510899	0.0353167	0.148173	0.00795825	0.0728656	0.913028	-0.104261	0.100149	0.297851	-0.00069324	0.0714744	0.992267	0.45437	0.356865	0.202939	-0.065468	0.25475	0.797186	-0.0463665	0.0773458	0.548861	3.99992e-05
9	34074476	rs12001437	UBAP2	C	T	0.369	1.03 (1.02-1.04)	4e-10	5.6e-11	0.0410994	0.0333297	0.21769	0.310891	0.268665	0.24721	0.0048916	0.0333682	0.883468	-0.00365868	0.0757295	0.961469	-0.0468107	0.109114	0.667915	0.00265159	0.0331182	0.936195	-0.0439285	0.0335645	0.190773	-0.127692	0.0694143	0.0658313	-0.00613478	0.0933911	0.947624	0.0342275	0.0679379	0.614444	-0.024137	0.357769	0.946211	0.105719	0.232988	0.650015	0.0107817	0.0739034	0.883984	-0.043416
9	81914978	rs13290396	TLE4	C	T	0.928	1.10 (1.08-1.12)	7.5e-25	1.4e-26	-0.142137	0.0743819	0.0561727	1.23128	1.01451	0.224871	-0.0274282	0.0745086	0.712826	-0.33174	0.161908	0.0404689	-0.156841	0.236793	0.507745	-0.076093	0.0739316	0.303505	-0.0124648	0.0749838	0.867992	-0.239151	0.152872	0.117726	0.105976	0.219537	0.629288	-0.0187334	0.151667	0.901673	-0.244561	0.751828	0.744966	0.200183	0.60143	0.739252	-0.0990034	0.166412	0.551889	0.0778275
9	83998346	rs9332453	TLE1	C	T	0.624	1.03 (1.02-1.04)	4.5e-07	1e-09	-0.020005	0.0338529	0.554634	0.234576	0.285932	0.411993	-0.0140136	0.0338798	0.679196	-0.0222115	0.0770654	0.773184	0.130803	0.112551	0.245168	-0.0229283	0.0336232	0.495377	-0.0534242	0.0340736	0.117075	-0.0216832	0.0702804	0.757657	0.00655242	0.0949717	0.944997	0.0494077	0.0689666	0.473742	0.370403	0.380728	0.330613	-0.015893	0.241118	0.947456	0.162725	0.0746908	0.0293584	0.0965285
9	84308948	rs2796441	TLE1	G	A	0.594	1.07 (1.06-1.08)	3.6e-35	3.5e-43	-0.011019	0.0332862	0.740654	-0.157363	0.263338	0.550128	-0.0234041	0.0333075	0.482352	-0.103882	0.0757352	0.170157	-0.14729	0.108878	0.176126	-0.00973116	0.0330616	0.768536	0.00243629	0.0335234	0.942073	-0.059061	0.0691483	0.39301	-0.0219278	0.0937086	0.81499	0.0694144	0.067811	0.306005	-0.418144	0.34714	0.228382	0.327346	0.245773	0.182891	0.0416953	0.0735042	0.570548	-0.0714459
9	96971175	rs12345069	ZNF169	C	T	0.734	1.04 (1.03-1.05)	5.5e-10	4.4e-10	0.040861	0.0361486	0.258471	0.57583	0.336374	0.0869206	0.0511184	0.0361684	0.157725	-0.0164736	0.0822085	0.841192	-0.0717158	0.117465	0.541485	0.0660404	0.0358838	0.0658717	0.0422472	0.0364045	0.245998	0.0184797	0.075067	0.805543	-0.0346719	0.100896	0.731083	0.147207	0.0736755	0.0457107	0.238446	0.403565	0.554622	0.211963	0.268521	0.429895	-0.0401145	0.0803876	0.617758	-0.0440743
9	98278413	rs113154802	PTCH1	C	T	0.899	1.05 (1.04-1.07)	1.2e-09	4.3e-12	-0.0192654	0.0557541	0.729726	0.684148	0.596272	0.251226	0.0305978	0.0557929	0.583471	-0.098206	0.124391	0.429823	0.0730525	0.185066	0.693038	0.0371694	0.0553725	0.502139	0.00756059	0.0561514	0.892906	-0.0272357	0.1153	0.813233	0.0753617	0.159165	0.635868	0.0186019	0.113497	0.869812	-0.531933	0.48562	0.273354	0.0574755	0.399946	0.88573	-0.103486	0.125834	0.41084	0.103236
9	126015103	rs2416899	STRBP	T	G	0.857	1.03 (1.02-1.05)	4.1e-08	3.5e-10	-0.0542527	0.0459572	0.237952	1.12018	0.590417	0.0577929	-0.0517935	0.045993	0.260264	0.0506798	0.105504	0.630969	0.0988506	0.154688	0.522803	-0.0763307	0.0456293	0.0945287	-0.0434382	0.0462899	0.348165	-0.0352127	0.0952623	0.711651	0.0320543	0.130571	0.806076	-0.212746	0.0946104	0.0245359	-0.490315	0.418604	0.241474	0.0897781	0.334964	0.788681	-0.0463586	0.102414	0.650807	0.011858
9	136149229	rs505922	ABO	C	T	0.337	1.05 (1.04-1.06)	1.2e-19	2e-21	0.0190441	0.0337759	0.572934	0.0887524	0.271387	0.743651	0.0358061	0.0337937	0.289489	-0.0913952	0.0775662	0.238681	0.0127583	0.110973	0.908464	0.0152109	0.0335488	0.650317	0.000193079	0.0340186	0.995472	-0.0128796	0.0701437	0.854314	0.0372765	0.0945602	0.693395	0.0306941	0.068837	0.65566	-0.0881036	0.366911	0.810236	-0.11799	0.247992	0.634228	-0.028912	0.0745747	0.698247	-0.07276
9	139243334	rs28429551	GPSM1	A	T	0.749	1.09 (1.07-1.10)	8.5e-35	3.9e-44	0.0182321	0.0384298	0.635252	0.710476	0.372512	0.0564871	0.0209895	0.0384577	0.585283	0.100392	0.0885963	0.257158	0.329538	0.135173	0.014773	0.0133452	0.0381713	0.72667	-0.0436558	0.0386916	0.25934	-0.0612832	0.0796327	0.441556	0.00344994	0.108083	0.974535	0.0041014	0.0782659	0.958209	0.312255	0.439059	0.476966	-0.227008	0.260704	0.383883	0.114066	0.0842963	0.176005	-0.0720974
9	139247229	rs74604683	GPSM1	C	T	0.888	1.05 (1.03-1.07)	1.6e-08	1.8e-11	0.0312629	0.0538094	0.561316	0.436606	0.520837	0.401876	0.0565134	0.0538383	0.294	0.0309717	0.122755	0.800805	-0.0589008	0.17146	0.731191	0.0597326	0.0534327	0.263754	-0.0130032	0.0541955	0.810411	-0.101518	0.11112	0.360928	0.0993365	0.154271	0.519634	-0.00451977	0.109615	0.967111	-0.112301	0.535805	0.833981	0.0329365	0.375845	0.930168	-0.0649634	0.120669	0.59035	0.219645
10	12307894	rs11257655	CDC123-CAMK1D	T	C	0.217	1.11 (1.10-1.12)	6.5e-78	1.2e-91	0.0452053	0.0417982	0.279611	0.638865	0.287281	0.0261589	0.0467881	0.0418285	0.26347	0.0754785	0.0943321	0.423657	0.0332897	0.135969	0.806577	0.0673575	0.0414994	0.104741	-0.0304048	0.0421024	0.470286	-0.0650987	0.0870482	0.454553	-0.0597999	0.119047	0.615441	0.0168964	0.0851625	0.842722	0.438184	0.40242	0.27621	0.0760625	0.288213	0.791843	0.199498	0.0949313	0.0355957	0.131204
10	26497704	rs7923442	MYO3A	A	G	0.826	1.04 (1.02-1.05)	1.2e-09	1.2e-09	-0.0101677	0.0422428	0.809818	-0.0949647	0.331585	0.774564	-0.00118506	0.042275	0.97764	0.0554345	0.0967869	0.566818	0.104871	0.141461	0.458485	0.0236405	0.0419545	0.573177	0.0109556	0.0425426	0.796805	-0.0338989	0.087532	0.698518	-0.273259	0.113267	0.0158444	-0.0161095	0.0860394	0.851501	0.836662	0.608372	0.169055	0.570724	0.359194	0.112083	0.0194938	0.0932893	0.834483	0.0148193
10	64974380	rs41274074	JMJD1C	G	C	0.972	1.06 (1.04-1.08)	6.3e-11	3.1e-11	-0.0608214	0.0965145	0.528656	-0.144325	0.719476	0.841018	-0.147993	0.0965352	0.125437	-0.171117	0.212317	0.420266	-0.0472747	0.306903	0.877577	-0.146498	0.095812	0.126433	-0.124037	0.097167	0.201927	0.0517439	0.201016	0.796862	-0.0347589	0.265771	0.895947	-0.283403	0.200605	0.157728	-1.11218	0.585738	0.0575952	0.0860177	0.700909	0.902327	-0.0497897	0.216701	0.818285	0.079917
10	71320943	rs190925	VPS26A-NEUROG3	A	G	0.314	1.04 (1.03-1.06)	5.1e-12	6e-17	-0.0241392	0.0346973	0.4867	-0.0551851	0.282863	0.84532	-0.0224535	0.0347238	0.517951	0.000259966	0.078802	0.997365	-0.161344	0.115573	0.162703	-0.0150932	0.0344656	0.661497	0.0448175	0.0349325	0.199663	0.106232	0.0719021	0.139546	0.0698245	0.0963532	0.468663	0.0422066	0.0707269	0.550689	-0.0305066	0.365889	0.933552	-0.290009	0.257233	0.259566	-0.0705641	0.0766793	0.357442	0.0496279
10	71332301	rs41277236	VPS26A-NEUROG3	T	C	0.043	1.11 (1.08-1.15)	5.3e-11	6.3e-11	-0.130286	0.0806502	0.106386	0.439486	0.544318	0.419432	0.00843539	0.0807674	0.916831	-0.0801748	0.187661	0.669212	-0.294265	0.297921	0.323286	-0.00911025	0.0801621	0.909529	-0.0285797	0.0812776	0.725155	0.112954	0.166658	0.497912	0.201364	0.215768	0.350701	-0.0265196	0.164311	0.871781	-0.34134	1.02159	0.738284	0.504266	0.484028	0.297498	0.0686862	0.180153	0.702996	0.075126
10	71466578	rs2642588	VPS26A-NEUROG3	G	T	0.702	1.05 (1.03-1.06)	1.4e-12	2.1e-15	0.083865	0.0348799	0.0162978	0.0408064	0.284737	0.886044	0.0321356	0.0349528	0.358007	0.14081	0.0805285	0.0803647	0.0732021	0.115374	0.525767	0.0675134	0.034663	0.0516023	-0.0189893	0.03518	0.589418	0.0126811	0.0724962	0.861139	-0.0604458	0.096787	0.532312	0.022758	0.0711474	0.749066	-0.424208	0.340349	0.212622	-0.433592	0.231212	0.0607507	-0.0326511	0.0777397	0.674437	-0.0325059
10	77244336	rs3012060	ZNF503-LRMDA	T	A	0.118	1.05 (1.03-1.06)	4.4e-11	1.6e-12	-0.00783567	0.0516813	0.879507	0.701001	0.337096	0.0375693	-0.0229299	0.0517174	0.657551	0.00838475	0.117449	0.943061	0.146651	0.162329	0.366303	-0.024956	0.0513292	0.626887	0.0264348	0.0520448	0.611568	-0.0246462	0.107374	0.81845	-0.110972	0.149145	0.456847	-0.107332	0.10518	0.30751	0.784755	0.430164	0.0681036	0.357632	0.333996	0.284276	-0.084664	0.113016	0.453779	-0.0318375
10	80943841	rs703980	ZMIZ1	G	A	0.536	1.06 (1.05-1.07)	2.5e-36	8.7e-40	-0.0543473	0.0334103	0.103981	-0.154779	0.263046	0.55625	-0.0283012	0.0334528	0.397661	0.0370448	0.0762494	0.627081	-0.0568623	0.109557	0.603747	-0.0509218	0.0331873	0.125109	-0.0240945	0.0336671	0.474286	-0.0643541	0.0694427	0.354059	-0.104126	0.0938945	0.267462	-0.0435287	0.0681159	0.522802	-0.280091	0.351577	0.425639	-0.0555388	0.234611	0.812875	0.0252952	0.0739328	0.732249	-0.105548
10	89766368	rs10887775	PTEN	A	G	0.15	1.04 (1.03-1.05)	1.4e-10	8.9e-11	0.068817	0.046532	0.139334	0.529233	0.312212	0.0900563	0.0841827	0.046553	0.07072	0.154016	0.103811	0.137913	0.151072	0.14632	0.30185	0.0737955	0.0462131	0.110471	-0.0144779	0.046889	0.757532	0.106142	0.0963254	0.270485	-0.0104777	0.132206	0.936832	-0.0701274	0.0947459	0.459199	-0.0974816	0.521949	0.851845	-0.160013	0.352194	0.64959	-0.0845366	0.101545	0.405127	-0.0681761
10	94460650	rs10882099	HHEX-IDE	T	C	0.588	1.02 (1.02-1.03)	1.2e-14	7.4e-32	-0.0268402	0.0336196	0.424771	0.191069	0.275189	0.487484	-0.0015187	0.0336505	0.964007	0.0677404	0.0767139	0.377218	0.0527491	0.110599	0.633404	0.022701	0.0333941	0.496723	0.0268095	0.0338584	0.428572	0.0700631	0.0698715	0.315982	0.0937449	0.0949632	0.323558	0.0894795	0.0685185	0.191579	0.188136	0.363871	0.605129	0.331764	0.249045	0.182813	-0.0630781	0.0746756	0.398269	0.0316764
10	94468247	rs139027698	HHEX-IDE	T	C	0.026	1.01 (0.98-1.03)	0.72	1.2e-09	-0.0897143	0.101231	0.375606	-0.388745	1.01983	0.703066	0.073729	0.101313	0.466869	-0.0738026	0.234139	0.752603	0.054223	0.326919	0.868269	0.0554328	0.10056	0.581536	-0.248771	0.101805	0.0146355	-0.318426	0.217432	0.14306	0.240087	0.262866	0.361055	0.114105	0.207318	0.582064	NA	NA	NA	NA	NA	NA	-0.235424	0.216527	0.276918	-0.0036888
10	94479107	rs1112718	HHEX-IDE	A	G	0.599	1.02 (1.01-1.02)	8.3e-08	2.2e-14	0.00919408	0.0340578	0.787225	0.267368	0.283174	0.345075	0.0228647	0.0340797	0.502357	0.110713	0.0780442	0.15602	0.211027	0.114295	0.0648421	0.0343852	0.0338189	0.309409	0.0232406	0.0342959	0.49808	0.0974673	0.0708684	0.169031	0.0312131	0.0958539	0.744702	0.0577626	0.0693828	0.405118	0.0722546	0.364136	0.84271	0.236672	0.250093	0.343978	-0.0375559	0.0754656	0.618697	0.079956
10	99056190	rs10748694	ARHGAP19-SLIT1	A	T	0.408	1.04 (1.03-1.05)	5.2e-15	5.1e-17	0.00709742	0.033471	0.832094	0.247984	0.257226	0.335015	0.0147542	0.0334946	0.659632	-0.0648884	0.0763727	0.39553	-0.00519145	0.109846	0.962302	-0.002748	0.0332453	0.934132	0.00533091	0.0337088	0.874359	-0.00537844	0.0694592	0.93828	0.0135577	0.094119	0.885498	-0.0116294	0.0681598	0.864518	0.0479517	0.351895	0.89161	0.247961	0.229977	0.280952	-0.0184593	0.0740453	0.803128	0.0808516
10	112621837	rs7067540	BBIP1	C	T	0.752	1.04 (1.03-1.05)	4.5e-14	1.1e-14	-0.0379828	0.0377199	0.314083	-0.119044	0.29207	0.683577	-0.0258595	0.0377536	0.49346	0.00744666	0.0859728	0.930979	0.0172743	0.123854	0.889078	-0.0384704	0.0374647	0.304629	-0.0233854	0.0379942	0.538302	-0.0660592	0.0782107	0.398347	-0.101112	0.104417	0.332884	-0.162204	0.0772526	0.0357595	-0.358583	0.369667	0.33204	-0.0335218	0.259262	0.897132	-0.00239712	0.0835623	0.97711	-0.1101
10	114344288	rs12243296	TCF7L2	G	A	0.099	1.04 (1.03-1.05)	7.8e-11	9e-13	0.0228051	0.0534143	0.669468	-1.19822	0.717608	0.0949716	0.030032	0.0534522	0.574288	0.0457283	0.121007	0.705497	-0.122666	0.182982	0.502622	0.0310718	0.0530512	0.558154	-0.00602905	0.053796	0.910778	0.0760625	0.110693	0.491975	0.0220648	0.150454	0.883397	-0.0164099	0.108773	0.880085	0.199228	0.52929	0.706616	-0.118384	0.394333	0.764015	0.176915	0.121592	0.145665	0.0315665
10	114381965	rs7100404	TCF7L2	C	T	0.893	1.05 (1.03-1.06)	2.3e-17	1.5e-20	-0.0424286	0.0512757	0.408084	0.911816	0.593331	0.124349	-0.030271	0.0513187	0.555355	-0.0154303	0.116635	0.894771	0.0503443	0.170592	0.767908	-0.0413693	0.0509297	0.416736	-0.0224698	0.0516467	0.663565	-0.0451454	0.106457	0.671513	-0.0871589	0.141577	0.538121	0.0405991	0.104393	0.697346	-0.306123	0.481896	0.525263	-0.00553466	0.354616	0.987544	-0.158097	0.116418	0.17447	-0.0649353
10	114428364	rs2859885	TCF7L2	C	T	0.816	1.05 (1.03-1.06)	1.6e-10	8.6e-16	0.0637507	0.0406726	0.117191	0.40863	0.3862	0.29002	0.0690838	0.0406982	0.0897785	0.0545829	0.0934054	0.558978	0.124341	0.138629	0.369753	0.0442674	0.0404117	0.27348	-0.0493824	0.0409725	0.228259	0.0269889	0.0845357	0.749526	0.0995839	0.116977	0.394597	-0.030277	0.0829655	0.715173	-0.306992	0.381847	0.421422	-0.0570323	0.282136	0.839796	0.0490568	0.0895787	0.583941	0.166447
10	114552267	rs10787461	TCF7L2	G	A	0.624	1.04 (1.03-1.05)	3.3e-10	1.6e-11	-0.0485218	0.0337258	0.150402	-0.236004	0.267146	0.377009	0.0445579	0.033754	0.186974	-0.176882	0.0764315	0.0206533	-0.144689	0.109609	0.186808	-0.0015423	0.0335169	0.963303	-0.00657262	0.033984	0.846665	-0.00759111	0.0699891	0.913637	0.0851571	0.095577	0.372938	0.0172418	0.068734	0.801929	0.425861	0.392347	0.277736	0.561496	0.277216	0.0428177	-0.0334058	0.0747843	0.655114	-0.0642416
10	114715598	rs2104598	TCF7L2	G	A	0.476	1.04 (1.03-1.05)	2.3e-11	1.1e-14	NA	NA	NA	NA	NA	NA	NA	NA	NA	NA	NA	NA	NA	NA	NA	NA	NA	NA	NA	NA	NA	NA	NA	NA	NA	NA	NA	NA	NA	NA	NA	NA	NA	NA	NA	NA	NA	NA	NA	NA
10	114736670	rs114322470	TCF7L2	T	G	0.981	1.17 (1.12-1.23)	2.3e-11	3.1e-11	0.157423	0.130875	0.229189	-0.138065	1.03346	0.89372	0.214514	0.130928	0.101507	0.338542	0.321366	0.292137	-0.399702	0.374252	0.285522	0.276011	0.129882	0.0337128	-0.0575028	0.131849	0.662796	-0.113677	0.26974	0.673439	0.056035	0.370925	0.879922	-0.182488	0.269167	0.497784	-0.578079	1.04766	0.581097	0.242137	1.03047	0.814227	-0.165141	0.299803	0.581743	-0.383635
10	114758349	rs7903146	TCF7L2	T	C	0.291	1.33 (1.31-1.35)	9.0E-471	0	-0.00235271	0.0361318	0.94809	-0.136378	0.294159	0.64292	0.0143177	0.0361572	0.692163	0.0573251	0.0817085	0.482931	0.110047	0.115987	0.342744	-0.0263602	0.0358825	0.462661	-0.000919896	0.0363883	0.979834	-0.163569	0.0756195	0.0305374	-0.0523307	0.102007	0.60794	-0.116766	0.0736016	0.112632	-0.293629	0.404779	0.468204	-0.172976	0.261986	0.509094	0.0219376	0.0802491	0.784536	-0.0727395
10	114797893	rs7076754	TCF7L2	G	A	0.832	1.07 (1.05-1.08)	2.7e-15	9e-18	-0.0124458	0.0437133	0.775895	-0.115291	0.341524	0.735686	-0.0145192	0.0437455	0.740002	-0.0737429	0.0989696	0.45623	0.181738	0.151346	0.229825	-0.0295562	0.0434135	0.49608	-0.0152658	0.0440231	0.728805	0.0342613	0.0910946	0.70684	0.0474502	0.124811	0.703815	-0.0172012	0.0890639	0.846816	0.364651	0.536425	0.496644	0.290331	0.345249	0.400386	0.0879376	0.0955494	0.357395	0.105513
10	114834411	rs145003494	TCF7L2	A	G	0.01	1.21 (1.14-1.28)	1.7e-10	6.5e-15	NA	NA	NA	NA	NA	NA	NA	NA	NA	NA	NA	NA	NA	NA	NA	NA	NA	NA	NA	NA	NA	NA	NA	NA	NA	NA	NA	NA	NA	NA	NA	NA	NA	NA	NA	NA	NA	NA	NA	NA
10	114836181	rs116929578	TCF7L2	G	A	0.043	1.12 (1.08-1.16)	2.8e-12	4.4e-12	-0.0756164	0.082112	0.357227	0.118112	0.599484	0.843815	-0.00272727	0.0821922	0.973533	0.141986	0.180689	0.431995	0.184818	0.249839	0.459443	-0.0360101	0.0815719	0.658938	-0.0691794	0.0826982	0.402967	-0.235745	0.17375	0.174844	-0.37418	0.257739	0.146564	-0.186021	0.167052	0.265471	0.248679	0.739645	0.736708	0.0971267	0.527516	0.853916	0.249856	0.192559	0.194441	-0.239812
10	114859416	rs7081841	TCF7L2	G	C	0.288	1.05 (1.03-1.06)	2.5e-13	9.3e-16	-0.0124512	0.0356689	0.727072	0.0544124	0.287118	0.849694	-0.0424314	0.0356829	0.234544	-0.0359433	0.0816021	0.659592	0.00401194	0.117169	0.972682	-0.0532836	0.0354073	0.132527	-0.0536939	0.0359014	0.134931	0.00294566	0.0740544	0.968253	-0.0580127	0.10103	0.565822	-0.0511828	0.072635	0.48102	0.67015	0.349952	0.0554961	-0.217768	0.267767	0.416062	-0.0619818	0.0785691	0.430182	-0.1028
10	115016408	rs12257761	TCF7L2	T	C	0.113	1.06 (1.05-1.08)	2.2e-12	5.2e-17	-0.108149	0.047434	0.0227225	0.704898	0.306979	0.0216626	-0.040382	0.0475272	0.395624	-0.135244	0.110765	0.222089	-0.314756	0.171998	0.0672508	-0.0298146	0.0471751	0.527467	0.0481795	0.047825	0.31387	0.00413145	0.0986283	0.96662	-0.0343968	0.134329	0.797904	-0.0488269	0.0966944	0.61359	-0.131178	0.52428	0.802429	-0.417079	0.396872	0.293299	-0.13091	0.103439	0.205665	-0.133397
10	115069951	rs11196296	TCF7L2	T	C	0.014	1.02 (0.98-1.06)	0.32	1.4e-10	-0.0566268	0.131719	0.667314	NA	NA	NA	-0.31299	0.131621	0.0175107	-0.186508	0.310142	0.547599	-0.0233925	0.417505	0.955318	-0.154629	0.130786	0.237238	0.147222	0.132616	0.267084	0.180996	0.270407	0.503272	-1.08176	0.587726	0.0656836	0.0677147	0.268593	0.800954	0.623744	0.950074	0.51149	-0.224178	0.959556	0.815275	-0.351018	0.276411	0.204114	-0.110102
10	115119864	rs7093035	TCF7L2	G	A	0.912	1.08 (1.06-1.11)	2.7e-12	4.3e-12	0.0734961	0.0608703	0.227425	0.913068	0.721289	0.205554	0.0223345	0.0609376	0.714024	0.017542	0.139125	0.899663	-0.147592	0.191617	0.441142	0.0314437	0.0604787	0.603186	-0.0475669	0.0613166	0.437992	-0.0106531	0.126392	0.932832	-0.0310334	0.169356	0.854594	0.0334037	0.123966	0.787578	-0.0604081	0.61575	0.921844	0.19824	0.466862	0.671113	-0.0183408	0.135367	0.892243	-0.139197
10	115136540	rs72830009	TCF7L2	G	A	0.029	1.23 (1.18-1.28)	1.8e-23	2e-26	0.0426233	0.111398	0.702043	-0.137923	0.998072	0.890091	0.0293528	0.111483	0.792354	0.238442	0.242286	0.325049	0.214781	0.335562	0.522137	0.0826903	0.110633	0.454899	-0.129888	0.112152	0.246954	-0.0721847	0.233159	0.756871	-0.214315	0.337334	0.525219	0.024595	0.227282	0.913827	NA	NA	NA	0.311689	0.703277	0.657622	-0.105308	0.241913	0.663332	-0.503895
10	115247447	rs11596522	TCF7L2	T	G	0.091	1.05 (1.03-1.07)	1.1e-06	1.6e-09	0.0284134	0.0583326	0.62625	-0.26706	0.53932	0.620473	-0.0270861	0.0583765	0.64271	0.140066	0.130116	0.281701	-0.0296297	0.19236	0.877583	0.0403566	0.0579347	0.486149	0.0885908	0.0587141	0.131509	0.242554	0.120064	0.0433598	-0.0798087	0.167115	0.63296	-0.00725425	0.118833	0.951326	0.372336	0.556774	0.503665	-0.340647	0.480431	0.478297	-0.159153	0.126395	0.207969	-0.220264
10	122834572	rs11199753	WDR11	G	T	0.894	1.05 (1.04-1.07)	2.5e-11	2.2e-13	-0.0745428	0.051555	0.148379	0.126642	0.433755	0.770313	-0.0675438	0.0515987	0.190691	-0.0981063	0.11585	0.397102	0.121659	0.175685	0.488633	-0.0803326	0.0512016	0.116833	-0.0777666	0.0519187	0.134344	-0.240928	0.106105	0.023167	-0.12591	0.140903	0.37153	-0.0325737	0.105138	0.756686	-0.320771	0.493288	0.515516	-0.00103946	0.364219	0.997733	0.00849397	0.113933	0.940571	-0.12197
10	122909625	rs2172073	WDR11	A	C	0.975	1.05 (1.04-1.07)	8.7e-12	6.2e-14	0.11526	0.102625	0.261533	0.63961	1.0103	0.526677	-0.168074	0.102662	0.101767	0.104828	0.236788	0.657975	0.188745	0.354573	0.594508	-0.133965	0.101919	0.188867	0.0445049	0.103384	0.666895	0.483008	0.227161	0.0334799	-0.640922	0.242994	0.00834933	-0.529681	0.218946	0.0155533	-0.0569662	1.01385	0.955188	NA	NA	NA	0.471451	0.214407	0.0278879	-0.201519
10	122968964	rs11592107	WDR11	A	G	0.312	1.03 (1.02-1.04)	3.7e-09	1.8e-09	0.0292806	0.035798	0.413498	0.402942	0.274077	0.141513	-0.0109639	0.0358303	0.759642	-0.0644404	0.0819908	0.4319	0.0647572	0.116129	0.577121	-0.000522354	0.0355627	0.988282	0.0331235	0.0360504	0.358315	0.119887	0.0741939	0.106134	-0.108806	0.101921	0.285719	0.0750704	0.0730593	0.304188	0.406431	0.355644	0.253122	0.334349	0.241833	0.166797	0.0294617	0.0794714	0.71086	0.00997013
10	124167512	rs2421016	PLEKHA1	C	T	0.512	1.04 (1.03-1.05)	6.2e-18	9.6e-23	-0.0393195	0.0322302	0.222637	-0.0397783	0.259101	0.877982	-0.0243012	0.0322623	0.451404	0.00826103	0.0734858	0.910498	0.0790897	0.106132	0.456149	-0.032029	0.0320168	0.317257	0.0457186	0.0324546	0.159095	-0.0683874	0.0669534	0.307058	0.172884	0.0911496	0.0578662	0.0319469	0.0656713	0.626637	-0.0889811	0.340828	0.794029	0.0803352	0.228903	0.725621	-0.0562385	0.0714087	0.430924	0.0966816
11	2077271	rs76547628	INS-IGF2-KCNQ1	T	C	0.184	1.04 (1.02-1.05)	1.7e-07	1.3e-14	0.0368507	0.0412454	0.371733	-0.448042	0.382262	0.241165	0.0258674	0.0412808	0.530985	0.131019	0.0924852	0.156592	-0.0110347	0.135374	0.935034	0.0276281	0.0409707	0.500181	0.0297206	0.0415415	0.474426	-0.134823	0.0863953	0.118633	0.0142973	0.115682	0.901617	-0.0470853	0.0839658	0.574954	0.117801	0.427605	0.782933	0.392049	0.263905	0.137395	-0.0243859	0.0910097	0.788736	0.0977708
11	2194420	rs10770142	INS-IGF2-KCNQ1	G	C	0.381	1.07 (1.06-1.08)	4.8e-28	6.3e-34	0.00272681	0.0355888	0.938934	0.0157651	0.279157	0.954965	0.0131293	0.035614	0.712428	-0.0668623	0.0812571	0.410595	0.135815	0.114899	0.237177	0.0226802	0.0353445	0.521155	0.0527021	0.0358203	0.141384	0.00585284	0.0737748	0.936759	0.118414	0.0987407	0.230437	0.0235212	0.072512	0.745624	-0.0738748	0.378463	0.845238	0.321272	0.242157	0.184605	-0.108061	0.0784822	0.168547	0.125098
11	2235129	rs4930050	INS-IGF2-KCNQ1	G	A	0.014	1.06 (1.02-1.09)	0.00062	2.9e-10	0.0194132	0.162098	0.904684	NA	NA	NA	-0.298843	0.162069	0.0653555	-0.222441	0.380905	0.559234	-0.818749	0.725011	0.258775	-0.202518	0.160934	0.20841	0.0617613	0.163242	0.705221	0.18432	0.331421	0.578109	-0.754538	0.598	0.207031	0.00202794	0.330305	0.995113	NA	NA	NA	0.20476	1.01132	0.839554	0.205322	0.382347	0.591261	0.1308
11	2364549	rs800125	INS-IGF2-KCNQ1	A	C	0.758	1.01 (1.00-1.02)	0.071	4.4e-09	0.0907048	0.0375604	0.0158366	0.135468	0.315279	0.667432	0.021438	0.0376448	0.5691	0.164303	0.087845	0.0614318	0.114062	0.126528	0.367336	0.0590594	0.0373405	0.113903	-0.0154538	0.0378854	0.683388	-0.0343918	0.0779585	0.659137	0.0213554	0.10624	0.840687	0.0874442	0.0765718	0.25346	-0.202296	0.384723	0.599012	-0.173113	0.255579	0.498189	-0.076081	0.0840037	0.365113	-0.016267
11	2375458	rs79495865	INS-IGF2-KCNQ1	G	A	0.741	1.02 (1.01-1.04)	0.00088	4.4e-10	0.000836776	0.0376627	0.982277	0.0645407	0.298518	0.828829	0.00786809	0.0376903	0.834662	0.00110761	0.0855371	0.98967	-0.0157454	0.122457	0.897719	-0.0233037	0.0374044	0.533349	-0.0359721	0.0379208	0.342943	0.0456995	0.0783143	0.559529	-0.136548	0.10365	0.187711	-0.0627212	0.0767907	0.414033	-0.333561	0.371831	0.369684	0.265868	0.277645	0.338273	0.0929863	0.0827681	0.261241	-0.185948
11	2579163	rs2283164	INS-IGF2-KCNQ1	A	G	0.947	1.09 (1.06-1.12)	2.9e-12	3.4e-14	0.0739336	0.0778241	0.342233	-0.248913	0.535109	0.641816	-0.0195977	0.0778999	0.801397	0.146433	0.181305	0.419288	0.681031	0.320881	0.0338061	0.0790321	0.0772954	0.306694	0.0213768	0.0783942	0.785127	-0.0290927	0.161317	0.856902	-0.0988584	0.21387	0.643905	-0.274544	0.160469	0.0871042	NA	NA	NA	0.837313	0.729667	0.251163	0.30464	0.165588	0.0658054	-0.176018
11	2634177	rs80102379	INS-IGF2-KCNQ1	G	T	0.983	1.15 (1.10-1.20)	5.4e-10	3.8e-10	0.0426212	0.121374	0.725512	NA	NA	NA	0.0747087	0.121456	0.53856	0.452494	0.306312	0.139613	0.275628	0.436998	0.528217	0.0718802	0.120547	0.551058	-0.0236302	0.122239	0.846736	0.438958	0.265215	0.0979036	0.381126	0.383962	0.320899	0.164905	0.246845	0.5041	NA	NA	NA	0.399311	1.02639	0.697243	0.0807058	0.265599	0.76123	0.427286
11	2681072	rs151215	INS-IGF2-KCNQ1	G	A	0.232	1.04 (1.03-1.05)	6e-10	1.1e-17	-0.0118488	0.0377055	0.75337	0.410559	0.28255	0.146209	-0.0116414	0.0377337	0.757726	-0.0217539	0.0857474	0.799731	-0.056619	0.124455	0.649154	-0.00235246	0.0374518	0.949922	0.00022684	0.0379742	0.995234	-0.111556	0.0785978	0.155801	-0.227017	0.110253	0.039488	0.0566733	0.0769306	0.461338	-0.360284	0.440871	0.413809	-0.428522	0.303026	0.15732	0.0144156	0.0838511	0.863547	-0.125665
11	2691500	rs231361	INS-IGF2-KCNQ1	A	G	0.257	1.09 (1.08-1.10)	1.4e-49	1.9e-58	-0.0345157	0.0367987	0.348388	-0.282689	0.318025	0.374062	-0.0365453	0.0368251	0.321131	0.08424	0.0832298	0.311455	0.0317603	0.120055	0.791337	-0.0311487	0.0365516	0.394224	-0.0447197	0.0370541	0.227635	-0.00380322	0.0765067	0.96035	-0.12682	0.106279	0.232759	-0.0727309	0.0749323	0.331739	0.356905	0.364974	0.328131	0.259136	0.2468	0.293722	-0.0575168	0.0809224	0.477229	-0.235224
11	2799679	rs2237884	INS-IGF2-KCNQ1	T	C	0.73	1.04 (1.03-1.05)	1.9e-11	3.4e-20	-0.0252867	0.0371276	0.49591	-0.361569	0.279127	0.195196	-0.00346326	0.0371599	0.925756	-0.00353375	0.0845797	0.966672	0.0892969	0.123898	0.471074	-0.0263602	0.0368764	0.474807	-0.0490079	0.0373784	0.189979	0.0747343	0.0774096	0.334322	0.273307	0.109731	0.0127492	-0.0214973	0.0756617	0.776287	0.145703	0.410089	0.722368	0.24726	0.280461	0.377984	0.110472	0.0814786	0.175146	0.106543
11	2856658	rs4930011	INS-IGF2-KCNQ1	G	C	0.401	1.03 (1.02-1.04)	8.3e-08	8.1e-18	-0.00531337	0.0337762	0.875017	0.306727	0.265257	0.247549	-0.0326253	0.0337931	0.33445	0.077979	0.0767852	0.309842	0.0925336	0.110394	0.401929	-0.0274219	0.0335422	0.413729	-0.0481848	0.0339976	0.156565	-0.0353837	0.0701901	0.614184	0.0118792	0.0950376	0.900492	-0.0804143	0.0688137	0.242572	0.0569189	0.356396	0.873103	-0.0652663	0.239295	0.785049	-0.0143434	0.0746577	0.847646	-0.0222712
11	2857897	rs234866	INS-IGF2-KCNQ1	G	A	0.697	1.05 (1.04-1.07)	4.1e-25	8.4e-30	-0.0275853	0.0351822	0.433101	0.31492	0.299639	0.293259	-0.0112329	0.0352134	0.749767	0.106189	0.0807793	0.188662	0.0821237	0.11645	0.480669	-0.0163542	0.0349483	0.639874	-0.0474504	0.0354205	0.180532	-0.149996	0.072804	0.03937	0.0604636	0.0994848	0.543341	-0.0600127	0.0717512	0.402926	0.110887	0.377106	0.768722	-0.0070054	0.244515	0.97715	-0.0341019	0.0781962	0.662783	0.0761178
11	2858546	rs2237897	INS-IGF2-KCNQ1	C	T	0.954	1.15 (1.14-1.17)	1.6e-70	3.3e-112	0.0487276	0.084571	0.564568	-0.291452	0.597256	0.625564	-0.0616232	0.0846295	0.466613	-0.00801777	0.190951	0.966506	0.178072	0.292018	0.541994	-0.0059479	0.0840072	0.943563	0.0885823	0.0851539	0.298355	0.0604509	0.176185	0.731513	-0.12274	0.226442	0.587786	0.0510933	0.172106	0.766562	NA	NA	NA	-0.700267	0.426699	0.100771	-0.0493995	0.189976	0.794838	-0.363747
11	2908754	rs445084	INS-IGF2-KCNQ1	G	A	0.362	1.04 (1.03-1.05)	5.2e-12	3.6e-14	-0.00867338	0.0344121	0.801035	0.0125114	0.271285	0.963224	-0.0187484	0.0344356	0.586198	-0.0909526	0.0790994	0.250204	-0.0435403	0.113947	0.702377	-0.015036	0.0341784	0.660043	-0.0264584	0.0346514	0.445229	-0.107455	0.0718539	0.134793	-0.136754	0.0989797	0.167082	-0.0357681	0.0700512	0.609633	-1.07068	0.488511	0.0284001	-0.0378753	0.244262	0.876775	-0.133221	0.0755534	0.0778556	-0.119423
11	8654528	rs10769936	TRIM66	C	T	0.722	1.03 (1.02-1.04)	4e-10	6.9e-11	0.0320248	0.0356227	0.368772	0.669315	0.339095	0.0484007	0.0613221	0.0356284	0.0853903	-0.00382268	0.0811952	0.962453	0.182026	0.120731	0.13163	0.0161414	0.0353879	0.648352	-0.0125719	0.0358823	0.726105	-0.132045	0.0738326	0.0736977	0.0933529	0.101731	0.358806	0.0397965	0.072547	0.583302	0.329861	0.411032	0.422254	1.01998	0.332127	0.00213299	-0.0178497	0.0788657	0.820936	0.0864265
11	17408630	rs5215	KCNJ11-ABCC8	C	T	0.373	1.08 (1.07-1.09)	3.1e-49	1.3e-54	-0.0480536	0.0347459	0.166833	0.191356	0.274764	0.486154	-0.0127673	0.0347887	0.713664	0.103341	0.0790083	0.190868	0.185151	0.112843	0.100837	-0.0140016	0.0345277	0.685143	-0.0280964	0.0350047	0.422282	0.0760254	0.0721257	0.291842	0.130405	0.0970543	0.179053	0.0144353	0.0708031	0.838501	0.572436	0.361461	0.113267	0.277814	0.241511	0.25001	-0.0803113	0.0765482	0.294102	0.0787835
11	27683618	rs4923464	BDNF	C	T	0.798	1.03 (1.02-1.04)	2.8e-08	9.4e-10	0.0211278	0.04066	0.60339	0.828974	0.437638	0.0581986	-0.00665336	0.040693	0.870142	0.0914039	0.0935958	0.328775	0.0287864	0.133386	0.829134	0.00373214	0.0403883	0.926385	-0.0451052	0.0409381	0.270697	0.0437189	0.0846143	0.605374	-0.0717438	0.112434	0.523399	-0.00981171	0.0828445	0.905723	-0.205436	0.406298	0.613122	-0.0786633	0.278729	0.777761	-0.00644916	0.0901305	0.942941	0.081209
11	32927778	rs145678014	QSER1	G	T	0.957	1.10 (1.07-1.14)	5.1e-09	5.7e-10	0.0326413	0.092239	0.723471	NA	NA	NA	-0.195079	0.0921985	0.0344908	-0.270546	0.20121	0.178754	-0.314051	0.274734	0.25299	-0.14916	0.0915529	0.103437	0.1861	0.0927952	0.0450573	-0.0189101	0.191386	0.921303	-0.0126299	0.258951	0.961114	0.102503	0.18752	0.584634	NA	NA	NA	NA	NA	NA	-0.313693	0.216502	0.147358	0.331116
11	43816200	rs6485462	HSD17B12	C	T	0.304	1.03 (1.02-1.04)	9.5e-09	4.8e-12	0.0652284	0.0352634	0.0645102	0.168949	0.276434	0.541087	0.0742318	0.03528	0.0355075	0.0815892	0.0800005	0.3078	0.13619	0.114268	0.233323	0.0606198	0.0350292	0.0837003	0.00174434	0.0355467	0.960868	-0.00284103	0.0732727	0.969076	0.0277805	0.0988884	0.778732	0.0540525	0.0719663	0.452572	-0.0818589	0.383326	0.830898	0.604463	0.238483	0.0112569	0.197366	0.0795643	0.0131149	0.0191652
11	45858584	rs12419690	CRY2	G	A	0.448	1.03 (1.02-1.05)	2.7e-11	4.2e-11	-0.0108688	0.0331338	0.742928	-0.0522411	0.263605	0.842903	-0.021925	0.0331555	0.508517	0.0679857	0.0753095	0.366663	0.120526	0.108033	0.264579	-0.00663961	0.0329106	0.840137	0.00470249	0.0333698	0.887948	-0.0144205	0.0687899	0.833954	-0.0113512	0.0931062	0.902969	-0.0191451	0.0674744	0.776615	0.168924	0.34704	0.626438	-0.031014	0.232866	0.894049	-0.0268934	0.0733304	0.713814	0.0174567
11	49477266	rs6485981	FOLH1	T	C	0.075	1.04 (1.03-1.06)	4.6e-08	1.5e-09	0.0669788	0.0642894	0.297627	0.221887	0.486638	0.648419	0.0629554	0.0643395	0.327962	0.0996191	0.144704	0.491199	0.157482	0.203082	0.438068	0.0680746	0.0638542	0.286521	-0.0047973	0.0647648	0.940961	0.0256872	0.133495	0.847391	0.221278	0.172104	0.198539	0.147834	0.1317	0.261662	0.904663	0.504507	0.0729469	-0.311342	0.524059	0.552445	-0.0956886	0.140044	0.494431	0.36143
11	65326154	rs12789028	MAP3K11	A	G	0.185	1.06 (1.04-1.07)	1.8e-16	2.1e-17	0.0618113	0.0429895	0.150655	-0.613024	0.432848	0.1567	0.0545424	0.0430269	0.205089	0.151699	0.0961444	0.114606	0.00583296	0.14098	0.966979	0.0494491	0.0427075	0.247075	-0.0241657	0.0433153	0.57698	0.000589826	0.0892999	0.994687	0.129712	0.117675	0.270345	-0.0623266	0.0875459	0.47651	-0.708387	0.602474	0.239676	0.160953	0.291522	0.580871	0.213626	0.098245	0.0296725	0.125204
11	69463273	rs3918298	TPCN2-CCND1	G	A	0.973	1.12 (1.09-1.15)	9.6e-16	3.3e-17	-0.110123	0.0997081	0.269541	NA	NA	NA	-0.0620756	0.0998051	0.53404	0.234303	0.239288	0.327496	0.118718	0.340182	0.727101	-0.0537512	0.0990596	0.587461	0.11617	0.100413	0.247452	0.122628	0.209659	0.558622	-0.363302	0.253088	0.15115	-0.203895	0.205025	0.319988	-0.807292	0.755245	0.285109	-0.32622	0.602002	0.587893	-0.221198	0.230511	0.33726	-0.326407
11	72460398	rs77464186	CENTD2	A	C	0.836	1.11 (1.09-1.13)	1.2e-43	3.6e-49	-0.00678271	0.0460682	0.882965	-0.0750982	0.364557	0.8368	0.0183818	0.0461009	0.690139	-0.0450594	0.103866	0.664398	0.0074658	0.150654	0.960477	0.00480809	0.0457572	0.916325	-0.0104899	0.0463949	0.821148	0.0530285	0.0958561	0.580118	-0.0957283	0.125817	0.446765	0.0463508	0.0937519	0.621028	1.64794	1.01183	0.103381	0.476832	0.397021	0.229741	-0.135143	0.104349	0.195279	0.0423669
11	76156973	rs61894507	C11orf30	G	A	0.679	1.04 (1.02-1.05)	7e-10	2.2e-10	0.028898	0.0346983	0.405046	-0.428609	0.259922	0.0991492	0.0395231	0.0347185	0.255107	0.0974199	0.0798998	0.222742	0.0664903	0.115671	0.565411	0.0489344	0.0344515	0.155666	0.0052082	0.034951	0.881559	0.0500457	0.0722258	0.488372	-0.0329898	0.0974722	0.734987	-0.0314211	0.0707134	0.656804	-0.22483	0.352882	0.524037	-0.219384	0.236801	0.354209	0.0211572	0.0766002	0.782389	0.0442393
11	92708710	rs10830963	MTNR1B	G	C	0.279	1.08 (1.07-1.10)	6.5e-46	6.4e-69	-0.0402856	0.036464	0.26939	-0.0103534	0.292985	0.971811	-0.03215	0.0364956	0.378472	-0.0608802	0.0836306	0.466636	-0.0187456	0.120197	0.876063	-0.0668148	0.0361962	0.0650665	-0.0396163	0.0367234	0.28083	-0.0798368	0.0760044	0.293523	-0.31629	0.108434	0.00353536	-0.0463351	0.0742603	0.532659	0.0669762	0.379799	0.860023	-0.132837	0.265177	0.616415	-0.0704171	0.0803092	0.380582	-0.121623
11	93131667	rs11020308	MTNR1B	A	C	0.423	1.04 (1.03-1.05)	3.7e-11	2.6e-12	0.0609168	0.0327309	0.0628846	-0.146841	0.27059	0.587357	0.0248534	0.0327811	0.448451	0.0782288	0.074153	0.291421	-0.00817835	0.106941	0.93904	0.0220635	0.0325364	0.497784	-0.00223864	0.0329943	0.945913	-0.0324767	0.067973	0.632797	-0.0510512	0.0918727	0.578431	0.0119879	0.0667497	0.857485	-0.574231	0.380589	0.131352	0.101527	0.228544	0.656877	-0.0177801	0.0726246	0.806591	-0.134596
11	128040810	rs10893827	ETS1	A	G	0.853	1.04 (1.03-1.06)	1.8e-11	1e-12	0.0109012	0.0431682	0.800661	0.254073	0.375236	0.498341	-0.0670249	0.0431728	0.12072	-0.0828603	0.0970167	0.393084	-0.210569	0.133905	0.115824	-0.0619041	0.042853	0.14875	0.0838655	0.0434312	0.0536374	0.239378	0.0915034	0.00889515	0.0387741	0.122237	0.751089	0.0890433	0.0878677	0.310881	-0.554149	0.378114	0.142767	0.00493114	0.299827	0.986877	0.0286289	0.0953626	0.764018	-0.143858
11	128235252	rs7104712	ETS1	C	A	0.283	1.04 (1.03-1.05)	1.4e-10	1.6e-13	-0.0245081	0.0361679	0.498099	-0.0917404	0.296273	0.756828	-0.0470642	0.0361827	0.193512	-0.103658	0.0833936	0.213872	0.13578	0.11603	0.241927	-0.047499	0.035911	0.186105	0.0016282	0.0364292	0.964355	-0.103337	0.0755415	0.171326	-0.101643	0.1036	0.326539	-0.0103342	0.0736416	0.888401	-0.792406	0.488619	0.104862	-0.511633	0.292127	0.0798763	-0.0432666	0.0796761	0.587104	-0.0390392
11	128389391	rs11819995	ETS1	T	C	0.221	1.05 (1.04-1.06)	3.3e-14	9.3e-16	0.0344401	0.0383829	0.369688	0.083486	0.303872	0.783524	0.032246	0.0384126	0.401319	0.105062	0.086903	0.22669	0.0991211	0.124853	0.427259	0.0360935	0.0381227	0.343879	-0.0547542	0.0386427	0.156672	-0.131491	0.0804018	0.101961	-0.126331	0.111048	0.255275	-0.0858782	0.0781248	0.271665	0.0724044	0.401864	0.857024	-0.276523	0.297518	0.352665	-0.0230005	0.084595	0.78571	-0.106904
12	4033222	rs10848960	CCND2	G	C	0.769	1.04 (1.03-1.06)	1.7e-08	1.9e-09	-0.0141333	0.0397168	0.721992	-0.18721	0.311016	0.547224	-0.00473124	0.0397477	0.905263	-0.0808424	0.0897424	0.367703	-0.159974	0.12647	0.205895	0.0204069	0.0394471	0.604992	-0.00503114	0.04	0.899921	0.0377621	0.0826317	0.647679	-0.16992	0.108805	0.118356	-0.0149773	0.0809147	0.853153	-0.377326	0.390126	0.333447	-0.351628	0.263835	0.182611	-0.034556	0.0882161	0.695245	-0.0814509
12	4382324	rs3812821	CCND2	G	C	0.683	1.05 (1.03-1.06)	7.7e-12	7.4e-13	0.00176898	0.0354044	0.960156	-0.156328	0.276167	0.57134	0.00388853	0.0354307	0.91262	0.007625	0.0805789	0.924614	-0.0306747	0.115162	0.789979	0.00578058	0.0351651	0.869447	0.00891471	0.0356552	0.802595	0.0396061	0.0735967	0.590474	0.0602799	0.0999884	0.546595	-0.000739726	0.072113	0.991766	-0.494269	0.354018	0.162662	0.225496	0.259009	0.383967	-0.00647897	0.0784969	0.934224	0.10811
12	4384696	rs3217792	CCND2	C	T	0.914	1.14 (1.11-1.17)	3e-30	2.5e-36	0.0159848	0.0607588	0.792514	-0.193682	0.468647	0.679407	-0.0211886	0.0608032	0.727521	-0.2021	0.133219	0.129249	-0.417361	0.173895	0.0163921	0.00682991	0.0603493	0.909906	0.0418788	0.0611834	0.493758	0.0492795	0.126322	0.696454	0.0255424	0.170523	0.880933	0.0589966	0.123643	0.633252	0.942886	1.01169	0.351341	0.386027	0.514824	0.453361	-0.113632	0.137572	0.408823	-0.338463
12	4384844	rs76895963	CCND2	T	G	0.98	1.66 (1.57-1.75)	5.4e-75	3e-89	-0.110427	0.136582	0.418905	NA	NA	NA	-0.00606048	0.136708	0.964645	-0.352163	0.290113	0.224789	0.450267	0.520394	0.386907	-0.0652975	0.135675	0.630375	-0.195107	0.1375	0.15608	-0.182746	0.279963	0.513907	0.0310264	0.385992	0.935935	0.168788	0.278225	0.544075	NA	NA	NA	-0.440813	0.723407	0.542289	-0.589003	0.35372	0.0958803	-0.521255
12	4521511	rs78470967	CCND2	T	A	0.962	1.12 (1.08-1.16)	1.7e-10	5.2e-10	-0.039016	0.0912378	0.668971	0.845695	1.02333	0.40857	-0.142838	0.0912495	0.117672	-0.0645135	0.205221	0.753234	0.124957	0.313595	0.690288	-0.174013	0.090535	0.0547533	0.0593453	0.0918796	0.518423	0.0257189	0.189954	0.892298	-0.00059982	0.257554	0.99814	-0.0638852	0.186223	0.731539	0.145436	1.03022	0.887735	-0.442112	0.538216	0.411396	-0.601218	0.230531	0.00910773	-0.270935
12	12871099	rs2066827	CDKN1B	G	T	0.233	1.05 (1.03-1.06)	3.6e-11	7.1e-11	0.0172984	0.0399553	0.665106	-0.36039	0.339879	0.288986	-0.0158191	0.0399854	0.692431	0.105351	0.0900021	0.241777	-0.38224	0.144419	0.00812728	-0.0217403	0.0396842	0.583873	0.0159108	0.0402392	0.69259	-0.133621	0.0837216	0.110487	-0.0600908	0.114277	0.599003	-0.14953	0.0813868	0.0661708	-0.743449	0.536256	0.165633	0.36878	0.254152	0.146772	0.0606246	0.088965	0.495569	-0.050135
12	26474867	rs10842708	ITPR2	G	A	0.259	1.04 (1.03-1.05)	2.2e-12	5.5e-14	0.0339715	0.0370065	0.358746	-0.153861	0.302376	0.610864	0.0148871	0.0370409	0.687798	0.0249072	0.0839174	0.766573	0.083394	0.119365	0.484768	0.00614626	0.0367647	0.867248	0.0401072	0.037266	0.28196	0.000479885	0.0767964	0.995059	-0.0893013	0.105363	0.396685	-0.0997706	0.0753714	0.185596	0.879133	0.340802	0.00989169	0.48707	0.236995	0.03986	0.0413243	0.0823887	0.615944	-0.0281032
12	27964996	rs12578595	KLHDC5	C	T	0.803	1.07 (1.06-1.08)	4.8e-30	7.8e-33	-0.123606	0.0407996	0.00248305	-0.521035	0.294944	0.0773023	-0.0601833	0.0409079	0.14141	-0.0148689	0.0931811	0.873237	-0.0171226	0.133927	0.89826	-0.0613283	0.0406	0.131075	-0.0149311	0.0411903	0.717027	-0.0439882	0.0848053	0.603945	-0.0138437	0.1151	0.904262	0.0104575	0.0832762	0.900069	-0.63379	0.382993	0.0979584	-0.243393	0.276966	0.379523	-0.00542526	0.0903468	0.952098	0.0556015
12	31417019	rs78345706	FAM60A	A	G	0.008	1.12 (1.10-1.15)	2.9e-23	1.2e-24	NA	NA	NA	NA	NA	NA	NA	NA	NA	NA	NA	NA	NA	NA	NA	NA	NA	NA	NA	NA	NA	NA	NA	NA	NA	NA	NA	NA	NA	NA	NA	NA	NA	NA	NA	NA	NA	NA	NA	NA
12	33370406	rs6488140	PKP2-SYT10	A	G	0.133	1.04 (1.02-1.05)	4.8e-09	9.1e-12	-0.0535086	0.0437792	0.221774	0.352043	0.309069	0.254686	-0.0143431	0.0438284	0.743512	-0.0841406	0.100878	0.404237	-0.0793333	0.145372	0.585252	-0.0567069	0.043481	0.192337	0.13415	0.0439966	0.002328	0.0934084	0.0905828	0.302452	0.0734549	0.120988	0.543744	0.147359	0.0896391	0.100196	0.145874	0.443112	0.742007	0.0355023	0.296911	0.904815	-0.0547625	0.0963501	0.569784	0.139962
12	50263148	rs7132908	FAIM2	A	G	0.393	1.03 (1.02-1.04)	1.3e-09	6.5e-10	0.065292	0.0329072	0.0473903	-0.015338	0.266146	0.954044	0.0127744	0.0329657	0.698425	0.0914938	0.0746774	0.220511	0.134085	0.1069	0.20973	0.0117331	0.0327188	0.719932	-0.0125628	0.033175	0.704968	0.0777108	0.0682936	0.255145	0.0821605	0.0918318	0.37094	-0.116572	0.0671692	0.0826517	0.509849	0.341537	0.135486	0.154136	0.230873	0.504381	-0.0979514	0.0727841	0.178374	0.06274
12	66255005	rs343093	HMGA2	G	C	0.142	1.07 (1.06-1.08)	6.5e-29	6.6e-37	-0.0229904	0.0436239	0.598248	0.383363	0.310886	0.21753	-0.0123385	0.0436588	0.777506	-0.0548618	0.100183	0.583952	-0.0295895	0.14386	0.837042	-0.0268661	0.043328	0.535293	0.0383721	0.0439278	0.382491	0.145753	0.0899853	0.105293	0.229777	0.1161	0.0477996	0.103792	0.0892018	0.244603	0.289163	0.415157	0.486111	-0.502669	0.370721	0.175124	0.169397	0.099384	0.0882965	0.122465
12	66360164	rs7970350	HMGA2	T	C	0.488	1.04 (1.03-1.05)	2.2e-14	3.5e-17	-0.0563114	0.0328584	0.0867416	0.272583	0.267354	0.307938	-0.0506847	0.0328879	0.123457	0.0432092	0.074911	0.564066	-0.149066	0.108082	0.16783	-0.0820606	0.0326063	0.0119304	-0.0303783	0.0331105	0.35901	-0.0883863	0.0683466	0.195922	-0.222047	0.0929626	0.0169149	-0.208192	0.0673402	0.00199009	0.0848337	0.349681	0.808312	-0.13208	0.232476	0.569925	-0.171101	0.0730335	0.0191432	-0.0703
12	71449521	rs7313668	TSPAN8	T	G	0.421	1.04 (1.03-1.05)	1.1e-15	2.7e-17	0.0140953	0.0327376	0.666843	-0.0766834	0.259216	0.767362	0.00341562	0.0327635	0.916982	-0.103803	0.0751681	0.167296	-0.189403	0.110045	0.0852255	-0.0042459	0.0325179	0.896129	-0.0317601	0.0329633	0.335423	-0.0324364	0.068082	0.633766	-0.215771	0.0941422	0.0219076	0.00569376	0.066675	0.931979	-0.743233	0.390864	0.0572349	-0.655613	0.255527	0.010296	-0.037947	0.0722783	0.599572	-0.101608
12	97851611	rs7972074	RMST	C	T	0.853	1.04 (1.02-1.05)	2.5e-09	1.1e-10	0.0462567	0.0454936	0.309395	-0.0405372	0.353122	0.908614	-0.0206083	0.0455378	0.650923	0.0566825	0.104568	0.587772	0.0364534	0.15111	0.809372	-0.0325608	0.0451927	0.471317	0.0498792	0.0458147	0.276422	-0.0754506	0.0941837	0.423056	0.0735938	0.130187	0.571876	-0.0899412	0.092919	0.333056	-0.318672	0.435833	0.464673	0.378293	0.361813	0.29577	0.0809042	0.0998154	0.417634	0.0660458
12	108629780	rs1426371	WSCD2	G	A	0.734	1.05 (1.04-1.06)	2.5e-18	9.7e-19	-0.031228	0.03699	0.398652	-0.382203	0.283383	0.177426	-0.0220769	0.0370212	0.551027	-0.146746	0.0833317	0.0782482	-0.0744765	0.119975	0.534757	-0.031353	0.03674	0.393563	-0.0194511	0.0372571	0.60168	-0.0396533	0.0767006	0.605137	-0.104459	0.102218	0.306827	0.0113977	0.0753583	0.879784	-0.556399	0.35525	0.117297	-0.118583	0.257158	0.644709	-0.00196806	0.0819113	0.980867	-0.183737
12	112110489	rs3782886	SH2B3-ALDH2-BRAP	T	C	0.999	1.06 (1.04-1.09)	2.9e-07	1.1e-13	NA	NA	NA	NA	NA	NA	NA	NA	NA	NA	NA	NA	NA	NA	NA	NA	NA	NA	NA	NA	NA	NA	NA	NA	NA	NA	NA	NA	NA	NA	NA	NA	NA	NA	NA	NA	NA	NA	NA	NA
12	113117897	rs77753011	PTPN11-HECTD4	G	T	0.999	1.08 (1.05-1.11)	1.8e-08	4e-15	NA	NA	NA	NA	NA	NA	NA	NA	NA	NA	NA	NA	NA	NA	NA	NA	NA	NA	NA	NA	NA	NA	NA	NA	NA	NA	NA	NA	NA	NA	NA	NA	NA	NA	NA	NA	NA	NA	NA	NA
12	118412373	rs34965774	KSR2	A	G	0.142	1.06 (1.05-1.07)	1.9e-20	1.5e-21	-0.0707269	0.047849	0.139545	-0.154379	0.409101	0.705904	0.0606923	0.0478922	0.20522	-0.0920385	0.110084	0.403111	-0.0163875	0.155992	0.916332	0.0443025	0.0475428	0.35154	-0.0517805	0.0482021	0.282858	-0.105599	0.0999161	0.290566	0.107122	0.130168	0.410525	0.0842308	0.097799	0.389089	0.0708125	0.487203	0.884431	0.0374114	0.331021	0.910024	-0.165772	0.104304	0.111989	0.0392015
12	121416864	rs1800574	HNF1A	T	C	0.029	1.16 (1.12-1.20)	8.4e-21	2.2e-25	0.0245698	0.0998358	0.805631	0.0543272	0.734971	0.941075	0.0931813	0.0998883	0.351017	-0.0400431	0.228636	0.860969	-0.393463	0.376579	0.296097	0.0898659	0.099141	0.364819	0.0164945	0.100545	0.86971	0.0382683	0.206913	0.853287	0.434979	0.249893	0.0817425	0.180353	0.204747	0.378398	NA	NA	NA	-0.952794	1.01961	0.350061	-0.140272	0.216422	0.516895	0.456994
12	121456616	rs61953351	HNF1A	G	T	0.74	1.06 (1.05-1.07)	6.1e-18	1.3e-24	-0.0527918	0.0376117	0.160607	-0.0122546	0.304849	0.967934	0.0240866	0.0376558	0.522479	0.00577464	0.0858056	0.946342	0.174024	0.12771	0.172993	-0.0268479	0.0373725	0.472609	-0.0210343	0.0378958	0.578924	-0.030015	0.0780602	0.700561	0.00178359	0.105793	0.986551	-0.184178	0.0771243	0.0169364	0.974638	0.538324	0.0702179	0.36692	0.293721	0.211587	-0.00450982	0.0832453	0.956817	0.0179369
12	123618544	rs1790116	MPHOSPH9-ZNF664	T	G	0.782	1.04 (1.03-1.06)	5.7e-11	1.7e-11	0.0297517	0.0386887	0.441992	-0.399722	0.288218	0.165478	0.0324637	0.0387164	0.401859	0.0016744	0.0881074	0.984841	0.134827	0.131112	0.303791	0.0318988	0.0384264	0.406574	0.0363716	0.0389604	0.350658	-0.0459385	0.0801166	0.566382	-0.0397879	0.107558	0.711437	-0.0316343	0.0788603	0.688271	0.585465	0.486753	0.229055	0.300268	0.298934	0.315157	-0.0331446	0.086018	0.699967	-0.0264959
12	124545435	rs2451321	MPHOSPH9-ZNF664	C	G	0.598	1.03 (1.02-1.04)	8.3e-10	1.1e-10	-0.0684152	0.033395	0.0406367	0.169988	0.272744	0.533121	0.0255482	0.0334528	0.445139	-0.0244194	0.0760548	0.748198	-0.0656754	0.109082	0.54714	0.0121464	0.0332061	0.714565	-0.072511	0.0336279	0.0311916	-0.00302542	0.0694378	0.965248	0.128605	0.095009	0.175861	0.043063	0.0680984	0.527146	-0.134776	0.354205	0.703579	0.0546906	0.237568	0.817927	-0.0230913	0.0740176	0.755091	-0.0033444
12	133069698	rs12811407	FBRSL1	A	G	0.332	1.05 (1.04-1.06)	6.9e-15	2e-15	0.00332431	0.0357117	0.925844	-0.0661922	0.288304	0.818409	0.0095833	0.0357377	0.788609	-0.0461026	0.081402	0.571156	-0.0720708	0.117532	0.539744	0.0107886	0.0354697	0.761037	-0.0444547	0.0359503	0.216409	-0.146803	0.0745918	0.0490574	-0.0930807	0.101332	0.358318	-0.0160948	0.072725	0.824848	-0.167989	0.390622	0.667156	0.359149	0.239353	0.133486	0.0868014	0.0795708	0.27533	0.00972258
13	23309382	rs314879	SGCG	C	T	0.214	1.04 (1.03-1.05)	4.8e-11	3.7e-11	-0.0433943	0.0409057	0.288903	-0.706265	0.405726	0.0817284	-0.0706211	0.0409155	0.084512	-0.00766631	0.0929718	0.934284	0.143737	0.129845	0.268295	-0.0494688	0.0406254	0.223501	0.027714	0.0412036	0.501279	0.100153	0.0845127	0.236002	-0.0854501	0.11666	0.46388	-0.0436374	0.0832957	0.600357	-0.194337	0.45559	0.669698	-0.0140797	0.28761	0.960957	-0.12734	0.0896065	0.155285	-0.125442
13	26776999	rs34584161	RNF6	A	G	0.761	1.05 (1.04-1.06)	9e-18	3.5e-19	-0.00567167	0.0387056	0.883516	-0.0696846	0.308538	0.821324	-0.0041951	0.0387346	0.913767	-0.0233747	0.0873964	0.789104	0.017021	0.125627	0.892222	0.0186326	0.038442	0.627951	0.0243999	0.0389764	0.531382	-0.0155288	0.0801591	0.846379	0.261557	0.114361	0.0221892	0.0733538	0.0788082	0.351964	-0.224591	0.385143	0.559801	0.103706	0.277684	0.708798	-0.106583	0.0870517	0.220817	-0.052526
13	33554587	rs2858980	KL	G	A	0.169	1.06 (1.05-1.07)	9.7e-20	6.2e-22	-0.0167938	0.0423299	0.691609	-0.40882	0.381688	0.284131	0.0212812	0.0423604	0.615457	-0.0510986	0.0972203	0.599173	0.139997	0.134445	0.297732	0.0297848	0.0420401	0.478734	-0.00773574	0.0426318	0.856031	-0.14002	0.0889054	0.115272	0.0692275	0.117658	0.556293	0.138753	0.0866055	0.109138	-0.514093	0.534796	0.336408	0.0659469	0.289514	0.819807	-0.114999	0.0924253	0.213413	0.0409596
13	51096095	rs963740	DLEU1	A	T	0.712	1.04 (1.03-1.05)	1.5e-11	3.8e-11	0.0102655	0.0358913	0.774897	0.146693	0.297221	0.621625	0.00446321	0.0359187	0.901124	-0.0136662	0.0814826	0.866803	-0.120818	0.115525	0.29563	0.0243309	0.0356452	0.494954	-0.00151911	0.0361469	0.966482	-0.0180953	0.0744181	0.807917	-0.101943	0.0994031	0.305089	-0.0416888	0.0731496	0.568758	0.010213	0.3787	0.978484	0.360621	0.269944	0.181578	0.0760445	0.0792673	0.33739	-0.0136859
13	54107583	rs9568868	OLFM4	T	G	0.129	1.05 (1.03-1.06)	6.4e-13	1.5e-12	-0.057155	0.0487812	0.241485	-0.239168	0.422463	0.571307	-0.0273421	0.0488316	0.575598	-0.0629877	0.111606	0.572501	-0.000926429	0.15729	0.995301	-0.0193679	0.0484677	0.689494	0.000318082	0.0491458	0.994837	-0.00443783	0.101211	0.965022	0.192684	0.129754	0.137543	0.0819946	0.0996518	0.410595	-0.0879966	0.518254	0.865172	0.294258	0.294877	0.318324	-0.086276	0.107161	0.420761	0.0386148
13	80707429	rs1215468	SPRY2	A	G	0.716	1.08 (1.07-1.10)	1.4e-49	2.4e-56	-0.0108148	0.036214	0.765251	0.19653	0.307716	0.523038	0.0231246	0.0362378	0.523467	-0.139484	0.0814195	0.0866837	-0.159096	0.115486	0.168332	-0.000325919	0.0359703	0.992772	-0.0707848	0.0364345	0.0521934	-0.0260575	0.075007	0.728242	-0.20071	0.0986344	0.0418597	-0.0842033	0.073953	0.254883	-0.251669	0.358149	0.482248	-0.235357	0.243603	0.333965	-0.137472	0.0815019	0.0916577	-0.227892
13	91942919	rs34165267	MIR17HG	C	T	0.743	1.05 (1.04-1.06)	7.3e-17	6.7e-21	0.0199634	0.0376473	0.595986	0.177888	0.313567	0.570507	-0.0182466	0.0376759	0.628227	0.0354479	0.0862858	0.681206	-0.0903068	0.121636	0.457838	-0.0180352	0.0373935	0.629644	0.0844146	0.0378662	0.0259156	0.0470036	0.0784794	0.549225	0.0969383	0.108341	0.370921	0.0872609	0.0766669	0.255047	0.047833	0.408909	0.906879	-0.398239	0.244287	0.103058	-0.0243706	0.0833815	0.770073	0.115841
14	33303540	rs12883788	AKAP6	T	C	0.465	1.04 (1.03-1.05)	1.4e-11	1.9e-11	0.010316	0.0327465	0.752777	-0.132936	0.264481	0.615224	-0.0162884	0.0327696	0.619208	0.0337055	0.0743565	0.650373	-0.0979591	0.107057	0.360181	-0.0213243	0.0325224	0.512111	4.86119e-05	0.0329798	0.998824	-0.00631993	0.0679274	0.925878	0.0281112	0.0915775	0.758899	-0.105774	0.0667874	0.113254	-0.274647	0.347447	0.429252	-0.450804	0.237644	0.0578319	0.0346719	0.0726407	0.633132	0.0440647
14	38803756	rs2183237	CLEC14A	G	A	0.744	1.04 (1.03-1.05)	2.5e-14	5e-15	0.0309295	0.0371245	0.40488	-0.144022	0.285586	0.614037	0.0102609	0.0371584	0.782473	-0.0261647	0.0842182	0.756042	0.0852845	0.123206	0.488806	0.00458652	0.0368806	0.901043	0.011231	0.0373942	0.763951	0.0586943	0.0772595	0.447428	0.0960936	0.105748	0.36351	0.155766	0.0757044	0.0396325	-0.216876	0.375131	0.563167	0.117681	0.266341	0.658604	0.102892	0.0816731	0.207741	0.320331
14	79944099	rs8008910	NRXN3	A	G	0.219	1.06 (1.04-1.07)	4.6e-15	3.3e-15	0.0361861	0.0402717	0.369011	-0.0682853	0.325441	0.833805	0.0350539	0.0403023	0.384537	0.201201	0.0898367	0.0251147	0.0609258	0.130154	0.639691	0.020474	0.0400056	0.608868	-0.0112944	0.0405656	0.780718	0.130247	0.0832271	0.117595	0.10381	0.11125	0.350765	0.0519186	0.0820936	0.527082	0.0479327	0.429999	0.911234	0.0399608	0.284187	0.888164	0.0327189	0.0893795	0.714301	0.119666
14	101124721	rs12878003	DLK1-MEG3	G	A	0.257	1.04 (1.03-1.06)	2.2e-12	7.1e-14	-0.00739547	0.0377128	0.844554	-0.306251	0.325054	0.346114	0.00680552	0.037741	0.85692	-0.156965	0.0878401	0.0739476	-0.160213	0.128627	0.212926	0.00487502	0.0374583	0.896466	0.0616489	0.0379536	0.104479	-0.0170505	0.0784309	0.827904	-0.0841112	0.108041	0.436266	0.127725	0.0770967	0.0975781	0.222279	0.384831	0.563536	0.150882	0.260884	0.563035	0.0114443	0.0833813	0.890837	0.0254338
14	101255172	rs73347525	DLK1-MEG3	A	G	0.806	1.05 (1.04-1.07)	9e-14	7.6e-17	-0.0690047	0.0445641	0.12169	0.0184298	0.354974	0.958594	-0.0248763	0.0446227	0.577266	-0.160178	0.0993939	0.107064	-0.187351	0.13983	0.180298	-0.0592898	0.0442703	0.18065	0.00784698	0.0449093	0.861312	-0.00537553	0.0924655	0.953636	-0.0350679	0.123794	0.776988	0.0788885	0.0907155	0.384508	0.738151	0.607244	0.224148	0.314581	0.34651	0.363956	0.174293	0.0970872	0.0726197	0.0290839
14	101301866	rs1053900	DLK1-MEG3	C	T	0.386	1.03 (1.02-1.04)	1.8e-08	1.5e-09	-0.00691698	0.0330786	0.834388	-0.0144266	0.267862	0.957049	-0.00630707	0.0331034	0.848918	0.0241461	0.0751383	0.747912	0.00364335	0.10824	0.973136	-0.0265359	0.0328497	0.419313	-0.0475724	0.0332953	0.153232	-0.108966	0.0688366	0.11343	-0.0385485	0.0928945	0.678164	-0.198667	0.0676271	0.00330668	0.182297	0.345155	0.597397	-0.0590379	0.237352	0.803566	-0.00540257	0.0732673	0.941224	-0.0470759
14	103252270	rs11160699	TRAF3	A	G	0.158	1.04 (1.03-1.05)	3.4e-12	5.9e-12	-0.0160407	0.0441046	0.716127	0.238473	0.333211	0.474179	0.00277971	0.044139	0.949792	0.0650759	0.0994268	0.512794	-0.164971	0.150307	0.272396	-0.0223937	0.0438051	0.609265	-0.0773132	0.0443826	0.0816808	0.0171226	0.091391	0.85142	-0.116315	0.12662	0.358299	-0.150776	0.0897897	0.0931092	0.414848	0.410563	0.312288	-0.0570488	0.313845	0.85576	0.0419478	0.0983202	0.66966	-0.0573791
15	38843887	rs28582094	RASGRP1	G	A	0.252	1.04 (1.03-1.06)	6.2e-13	1.5e-13	0.0447989	0.035785	0.210769	-0.367862	0.311708	0.237942	-0.0171092	0.0358247	0.633005	0.0187236	0.0813131	0.817839	-0.121362	0.120013	0.311898	0.0205679	0.0355552	0.563012	-0.0541077	0.0360322	0.13336	0.0132814	0.0742458	0.85798	-0.115142	0.102412	0.260887	0.0047288	0.0729249	0.948287	-0.235546	0.397804	0.553772	-0.262941	0.265734	0.322422	-0.0108264	0.079247	0.891332	-0.232867
15	38873115	rs34715063	RASGRP1	C	T	0.122	1.09 (1.07-1.11)	4.1e-20	4.1e-21	0.0573021	0.0533633	0.283049	-0.787557	0.599098	0.188654	0.0502917	0.0534069	0.346486	0.0133801	0.121466	0.912291	0.0908822	0.170146	0.593225	0.0191607	0.0530176	0.71784	0.0629662	0.0537388	0.241467	-0.0899969	0.111789	0.420785	0.091147	0.146624	0.534199	0.0827222	0.109009	0.447926	-0.146468	0.607189	0.809381	0.61083	0.310672	0.0492816	0.0438638	0.118855	0.712062	0.217246
15	40398754	rs484943	INFAM2	T	C	0.324	1.03 (1.02-1.04)	1e-07	2.5e-09	NA	NA	NA	NA	NA	NA	NA	NA	NA	NA	NA	NA	NA	NA	NA	NA	NA	NA	NA	NA	NA	NA	NA	NA	NA	NA	NA	NA	NA	NA	NA	NA	NA	NA	NA	NA	NA	NA	NA	NA
15	40616742	rs3743140	INFAM2	A	G	0.11	1.05 (1.03-1.06)	6.2e-10	1.3e-17	0.0457234	0.0520337	0.379664	0.107158	0.399664	0.7886	-0.0558051	0.0520672	0.283955	0.0691062	0.116431	0.552832	-0.0739168	0.172635	0.668528	-0.0264452	0.0516894	0.60898	0.0654006	0.0523918	0.212081	0.0370164	0.107501	0.730617	-0.00989984	0.145254	0.945664	0.0873605	0.106371	0.411485	0.707114	0.418758	0.0912972	0.0455755	0.355379	0.897951	-0.0847597	0.114218	0.458035	-0.0835925
15	41818917	rs1473781	LTK	A	G	0.355	1.03 (1.02-1.04)	5.2e-09	2.1e-11	-0.0106999	0.0343562	0.7555	0.335958	0.265647	0.205986	-8.28003e-05	0.0343828	0.998079	-0.0327588	0.0785423	0.676616	0.0108608	0.112905	0.923375	0.0134661	0.0341236	0.693164	0.0401379	0.0345883	0.246018	0.0786078	0.071307	0.270276	0.0474369	0.0963125	0.622352	-0.0218796	0.0699721	0.754517	0.34585	0.353656	0.328115	0.409464	0.235826	0.0825107	-0.00250012	0.0759833	0.973755	0.0486759
15	52517714	rs3825801	MYO5C	C	T	0.897	1.05 (1.03-1.06)	2.4e-10	3.8e-11	-0.00240826	0.0549292	0.965034	-0.245281	0.415158	0.554652	-0.0909565	0.0549292	0.0979157	0.138833	0.128331	0.279323	0.0650549	0.183771	0.72334	-0.0804439	0.0545259	0.140294	0.0166948	0.0553178	0.76284	0.194079	0.115985	0.0942654	0.132207	0.159252	0.406441	0.21451	0.111838	0.0551051	1.32611	1.02189	0.194388	-0.222671	0.371425	0.548833	-0.0431265	0.122426	0.724657	-0.0100988
15	62391608	rs7163757	C2CD4A-C2CD4B	C	T	0.564	1.06 (1.05-1.07)	4.5e-31	2.4e-37	-0.0094647	0.0325577	0.771309	-0.370024	0.258996	0.153097	-0.0248044	0.0325776	0.44652	0.0297152	0.0745023	0.690001	0.0473925	0.107798	0.660193	-0.0299757	0.032331	0.35397	-0.0128321	0.0327882	0.695574	0.113827	0.0679569	0.0939368	0.125808	0.0930087	0.176168	-0.0644948	0.0663552	0.331059	0.337231	0.370782	0.36308	-0.356779	0.229901	0.120694	-0.0308589	0.0719389	0.667928	0.0154761
15	63871292	rs7178762	USP3	C	T	0.464	1.04 (1.03-1.05)	4.9e-12	9.2e-12	-0.0449428	0.0322356	0.163426	-0.0433899	0.264303	0.8696	-0.0163718	0.0322744	0.612028	-0.0500919	0.0732991	0.494359	0.0331349	0.104848	0.751974	-0.00771649	0.0320343	0.809673	-0.0327771	0.0324726	0.312927	-0.133915	0.0670853	0.0459123	-0.0111873	0.0901271	0.901218	-0.0358324	0.0657041	0.585501	-0.439254	0.35618	0.217488	-0.00072126	0.22792	0.997475	-0.048641	0.0714873	0.496241	-0.125847
15	68080886	rs4776970	MAP2K5	A	T	0.642	1.04 (1.03-1.05)	7.8e-12	5.7e-13	0.00629054	0.0335715	0.851385	0.256031	0.282339	0.364503	0.0494508	0.033577	0.140988	0.055647	0.0766379	0.467772	0.0579862	0.110319	0.599147	0.021478	0.0333413	0.519535	-0.0193922	0.0338071	0.566299	0.0301345	0.0697679	0.6658	-0.00848391	0.0940059	0.928058	-0.0101186	0.0683841	0.882364	0.125332	0.359975	0.727713	-0.087223	0.233998	0.709328	0.045486	0.0742355	0.540059	-0.0594475
15	75815758	rs11636031	PTPN9-SIN3A	T	C	0.758	1.05 (1.04-1.06)	5e-18	4.9e-19	-0.048263	0.0361153	0.181598	-0.315796	0.267819	0.238345	0.0259907	0.0361547	0.47231	-0.00146892	0.0824168	0.985804	0.0482159	0.120565	0.68922	-0.0196066	0.0358859	0.584886	-0.0133422	0.036388	0.713912	-0.0971086	0.0747816	0.194084	0.0551026	0.102789	0.591907	0.0282452	0.0735675	0.701023	-0.120021	0.375751	0.749415	0.600349	0.305012	0.049036	-0.0897127	0.0805768	0.265544	0.0737305
15	77776562	rs952472	HMG20A	C	A	0.707	1.08 (1.07-1.09)	2.1e-49	4.1e-56	0.034078	0.0354872	0.337036	0.261965	0.300365	0.383123	-0.014292	0.0355211	0.687472	0.0325521	0.0811995	0.688501	0.147633	0.119834	0.21796	-0.0112	0.0352554	0.750763	0.0176397	0.0357458	0.621736	0.00300652	0.0737095	0.967469	-0.123412	0.0985604	0.210533	-0.0793563	0.0724087	0.273126	0.168154	0.394859	0.670212	0.239546	0.265883	0.367619	0.0290417	0.0782793	0.710637	0.049455
15	90379632	rs6496609	AP3S2	C	A	0.281	1.07 (1.05-1.08)	6.5e-30	3.2e-34	0.0072306	0.0371789	0.845821	0.0968544	0.295411	0.743003	-0.0429051	0.0371935	0.248829	-0.0863621	0.0851735	0.310604	0.0530288	0.120222	0.659151	-0.00788284	0.0369277	0.830987	-0.0434034	0.0374295	0.246361	-0.00246804	0.0771183	0.974468	-0.174869	0.106969	0.102098	-0.00223349	0.0757229	0.976466	0.264639	0.375296	0.48072	-0.212217	0.273087	0.437096	-0.0266428	0.0822237	0.745913	-0.0288831
15	91513157	rs2890156	PRC1	A	T	0.141	1.07 (1.06-1.08)	2.9e-31	3.8e-34	-0.00330749	0.0468943	0.943779	-0.141962	0.394278	0.718805	0.0699107	0.0469009	0.136237	0.228179	0.104075	0.028348	0.0921233	0.151007	0.541819	0.0916662	0.0465284	0.0489756	-0.00618699	0.047227	0.895785	-0.05987	0.0976339	0.539738	0.208436	0.126116	0.0983897	0.124948	0.0959818	0.192986	-0.0386598	0.494081	0.937632	-0.460527	0.385183	0.231851	0.0213407	0.104195	0.837711	0.26992
15	93832067	rs7167984	RGMA	G	A	0.869	1.04 (1.03-1.06)	2.2e-12	3.4e-13	0.0408487	0.0482162	0.396995	-0.301119	0.358697	0.401195	-0.092008	0.0482137	0.0565036	-0.104495	0.108781	0.336753	0.0714423	0.163262	0.661682	-0.0820625	0.0478615	0.0865907	0.0178631	0.0485661	0.713058	0.0170933	0.100379	0.864784	-0.117703	0.132518	0.374419	-0.179091	0.0989574	0.0703356	-0.352198	0.464833	0.448642	0.121877	0.366648	0.73958	0.111564	0.105152	0.288696	-0.0184586
16	295795	rs6600191	ITFG3	T	C	0.825	1.04 (1.03-1.06)	1.5e-14	2.4e-15	-0.0218065	0.0407116	0.592277	-0.204735	0.311096	0.510469	-0.0211152	0.0407422	0.604337	-0.0545166	0.092273	0.554625	-0.0490473	0.132631	0.711508	0.000801236	0.0404398	0.984195	-0.0290721	0.0409982	0.478347	0.0434369	0.0848009	0.608495	-0.0405852	0.113917	0.721609	0.00164836	0.0829171	0.984141	0.168551	0.461437	0.714906	0.331169	0.322704	0.304783	-0.17694	0.0919579	0.0543327	-0.0709057
16	3613126	rs12445430	CLUAP1-SLX4	T	C	0.202	1.04 (1.03-1.05)	1e-11	2.5e-11	-0.00285519	0.039509	0.942398	0.14929	0.298367	0.616816	0.0834765	0.0394905	0.0346638	0.0101483	0.0896535	0.909867	-0.0616201	0.131111	0.638367	0.0569459	0.0392197	0.146681	-0.0750922	0.0397509	0.0590402	-0.0687008	0.0822596	0.403623	0.041708	0.109821	0.704103	0.0796611	0.0806581	0.323349	-0.160608	0.439713	0.71492	-0.567828	0.336366	0.0913865	-0.132777	0.0863301	0.124043	-0.198679
16	30045789	rs11642430	FAM57B	G	C	0.4	1.03 (1.02-1.04)	8.6e-09	6.6e-10	-0.00235756	0.0338509	0.944483	0.0561724	0.27179	0.836255	-0.0301283	0.0338689	0.37382	0.0973898	0.0767572	0.204514	0.171042	0.109621	0.118691	-0.0193805	0.0336193	0.564369	0.0115958	0.0340902	0.733782	0.0244584	0.0702197	0.727612	0.0217517	0.0948189	0.818584	-0.0514017	0.0689489	0.45597	-0.12315	0.364111	0.735197	-0.166342	0.244513	0.496317	0.0120274	0.0749872	0.872559	0.149575
16	53809123	rs55872725	FTO	T	C	0.418	1.13 (1.12-1.14)	1.1e-108	4.7e-128	0.0321264	0.0329666	0.32993	-0.269779	0.270966	0.319435	0.0834653	0.0329422	0.0113694	0.0452792	0.0751106	0.546629	-0.11417	0.109578	0.297451	0.0661978	0.0327159	0.0431754	0.0201233	0.0332059	0.54458	0.0386436	0.068452	0.572345	0.145294	0.0923869	0.115795	0.108253	0.0672907	0.107668	-0.253438	0.362175	0.484074	0.11652	0.232515	0.616268	0.0037928	0.0729105	0.958524	0.00620074
16	69651866	rs862320	NFAT5	C	T	0.577	1.04 (1.02-1.05)	2.5e-10	1.5e-10	-0.00960772	0.0333595	0.773375	0.339616	0.282868	0.2299	0.009877	0.0333843	0.767372	-0.0908913	0.0757141	0.229957	-0.235831	0.108017	0.0290136	-0.015087	0.033133	0.648913	-0.0495187	0.0335771	0.140445	-0.0128767	0.0692133	0.852424	-0.0730181	0.0932219	0.433461	-0.0287527	0.0679608	0.672202	0.464025	0.381611	0.224	-0.155036	0.233716	0.507113	-0.128349	0.0743338	0.0842289	0.0453374
16	73100308	rs6416749	ZFHX3	C	T	0.324	1.04 (1.03-1.05)	2.1e-11	1.5e-13	0.0108281	0.0343612	0.752702	-0.123119	0.281298	0.661616	0.0186765	0.034385	0.587087	0.0322736	0.0782024	0.679792	0.120934	0.111465	0.277932	0.0263198	0.0341245	0.440636	0.0554551	0.0345818	0.108976	-0.043014	0.0715041	0.547467	0.200472	0.0951368	0.0351035	0.0833664	0.0700922	0.23427	0.33852	0.35429	0.339336	0.134295	0.239738	0.575349	0.0996643	0.0764964	0.192612	0.192709
16	75243657	rs72802358	BCAR1	G	C	0.897	1.09 (1.07-1.11)	1.2e-22	2.9e-29	0.0706328	0.0518607	0.173374	-0.327777	0.36126	0.364239	-0.0504761	0.0519122	0.331012	-0.111953	0.115719	0.333318	-0.357884	0.153741	0.0199207	-0.0637743	0.0515149	0.215882	0.020754	0.0522529	0.691278	0.180805	0.109177	0.0977087	-0.172515	0.138985	0.214517	0.0447464	0.105587	0.671725	-0.0672754	0.524277	0.897889	0.225022	0.394241	0.568156	-0.179075	0.118818	0.13177	-0.252493
16	81534790	rs2925979	CMIP	T	C	0.299	1.05 (1.04-1.06)	3.8e-20	1.6e-21	0.0111161	0.0353011	0.752878	0.153828	0.274459	0.575159	0.00249011	0.0353284	0.943816	0.147627	0.0793913	0.0629565	0.251334	0.111388	0.0240478	0.0237668	0.0350593	0.497917	-0.0445966	0.0355374	0.209667	-0.0868877	0.0735448	0.237436	0.176773	0.0968814	0.0680542	-0.0223428	0.0718902	0.755961	0.498324	0.342844	0.146088	0.284336	0.234116	0.224558	-0.0376572	0.0780095	0.62929	0.0875071
16	88554480	rs9937296	ZFPM1	C	T	0.857	1.04 (1.03-1.06)	1.8e-09	5.3e-10	-0.0243994	0.0498632	0.624669	0.100278	0.384693	0.794346	-0.0140479	0.0499025	0.778353	-0.20352	0.109602	0.0633195	-0.0488664	0.158555	0.757953	-0.0302871	0.0495245	0.540907	-0.0272717	0.0502163	0.587138	0.00745673	0.103391	0.942505	-0.136199	0.135082	0.313323	0.104969	0.101456	0.300839	0.940568	0.731733	0.198654	0.555159	0.400142	0.165318	-0.108092	0.112914	0.338429	0.171441
16	89564055	rs12920022	SPG7	A	T	0.158	1.04 (1.03-1.06)	1.3e-08	9.9e-10	NA	NA	NA	NA	NA	NA	NA	NA	NA	NA	NA	NA	NA	NA	NA	NA	NA	NA	NA	NA	NA	NA	NA	NA	NA	NA	NA	NA	NA	NA	NA	NA	NA	NA	NA	NA	NA	NA	NA	NA
17	3828086	rs1043246	ZZEF1	G	C	0.156	1.05 (1.03-1.06)	9.3e-10	2e-11	0.081768	0.0486281	0.0928366	0.508304	0.322011	0.114445	0.0795147	0.0486665	0.102458	-0.0273393	0.111442	0.806202	-0.0566243	0.16251	0.727514	0.0777546	0.0483028	0.107628	-0.0210889	0.0490086	0.66702	-0.101642	0.101921	0.318636	-0.173362	0.143926	0.228389	-0.0217049	0.0990465	0.826543	-0.468475	0.613599	0.445172	-0.390306	0.383649	0.308987	0.0825196	0.108748	0.44795	-0.0432364
17	3988451	rs8071043	ZZEF1	C	T	0.326	1.04 (1.03-1.05)	6.2e-10	1.3e-11	0.0273214	0.0355918	0.442805	0.300616	0.274499	0.273449	0.0969527	0.0355521	0.00645098	0.0206944	0.0812315	0.798917	0.151991	0.11526	0.187282	0.0877771	0.0352976	0.0129792	-0.0291345	0.0358437	0.416426	-0.0325284	0.0740819	0.660601	0.011118	0.100396	0.911834	-0.0225309	0.0724879	0.755936	-0.276564	0.411174	0.501188	0.0448204	0.255775	0.860892	0.00801777	0.0785895	0.918709	-0.0198191
17	6953155	rs113748381	SLC16A11-SLC16A13	A	G	0.008	1.11 (1.09-1.14)	8.9e-21	2.3e-24	NA	NA	NA	NA	NA	NA	NA	NA	NA	NA	NA	NA	NA	NA	NA	NA	NA	NA	NA	NA	NA	NA	NA	NA	NA	NA	NA	NA	NA	NA	NA	NA	NA	NA	NA	NA	NA	NA	NA	NA
17	17751478	rs1108646	RAI1	A	G	0.334	1.04 (1.03-1.05)	1.9e-12	2.8e-13	-0.0229994	0.0340559	0.499543	-0.343984	0.287268	0.231138	0.0455782	0.0340689	0.18112	-0.118364	0.0780631	0.129456	-0.100454	0.112656	0.372561	0.0168508	0.0338278	0.618449	0.0166327	0.0342997	0.627789	0.0373343	0.0705584	0.596699	0.112703	0.0945973	0.233477	0.153571	0.0696653	0.027495	0.57523	0.345276	0.0957124	0.110378	0.234919	0.638467	-0.106512	0.0751505	0.156389	0.156876
17	29704002	rs1048317	NF1	T	C	0.376	1.04 (1.03-1.05)	6.2e-14	1.4e-14	0.0454651	0.0342719	0.184806	0.207802	0.265698	0.434162	0.00862684	0.0343133	0.801522	0.101446	0.0776429	0.191368	0.185192	0.11058	0.0939927	0.0238137	0.0340522	0.484435	0.00123245	0.0345317	0.971533	-0.0287462	0.0712121	0.686455	-0.279463	0.0998016	0.00510747	-0.0453301	0.0698152	0.516152	-0.175686	0.374041	0.638571	-0.218935	0.248284	0.377889	0.0563425	0.0761378	0.459298	-0.217471
17	36043653	rs3094515	HNF1B	C	T	0.629	1.04 (1.03-1.05)	3.7e-11	3.9e-12	0.0176881	0.0344567	0.607773	-0.156037	0.271124	0.564938	0.0152123	0.034483	0.659154	0.118208	0.0791039	0.135087	-0.0287235	0.111911	0.797455	0.0311528	0.0342187	0.362729	-0.023969	0.0346993	0.489802	-0.0121064	0.0715319	0.865556	-0.0222995	0.0965858	0.817371	-0.0160603	0.0701844	0.819043	-0.121368	0.363152	0.738226	-0.141291	0.238227	0.553107	-0.0196261	0.0763701	0.797156	-0.000959539
17	36056076	rs12449654	HNF1B	C	G	0.329	1.05 (1.03-1.06)	2.9e-14	4.6e-24	0.0165168	0.0353463	0.640351	0.0617628	0.282312	0.826824	0.047376	0.0353575	0.18044	0.0277902	0.0803746	0.729503	0.15345	0.114118	0.178724	0.0506595	0.0350898	0.148991	-0.0488286	0.0355811	0.170132	-0.0273023	0.0734549	0.710129	-0.010119	0.0994548	0.91896	-0.00339375	0.0719893	0.962397	0.310209	0.362221	0.391774	0.000909586	0.252194	0.997116	-0.00854642	0.078151	0.912917	-0.0378597
17	36099952	rs10908278	HNF1B	T	A	0.483	1.09 (1.07-1.10)	6.8e-51	1.2e-79	0.0380548	0.0324615	0.241226	-0.145965	0.262497	0.578167	0.0493704	0.0324774	0.128647	0.0565032	0.0741123	0.445831	-0.0372202	0.107146	0.728304	0.0366321	0.032243	0.256051	0.0646381	0.0326693	0.0480155	0.116084	0.0675691	0.0857994	-0.0137572	0.09144	0.880406	0.0676493	0.0661926	0.306804	0.398058	0.352184	0.258372	-0.00539151	0.233611	0.981586	0.0029656	0.0717811	0.967016	0.0930713
17	40696915	rs684214	MLX	T	C	0.275	1.04 (1.03-1.05)	1.3e-12	3e-13	0.0648037	0.0377954	0.0865892	0.150633	0.293699	0.608033	0.00864214	0.0378534	0.819434	0.146876	0.0851504	0.0845507	0.162042	0.120952	0.180345	0.0107646	0.0375694	0.774507	0.000263792	0.0380942	0.994476	-0.0488405	0.0787106	0.534921	-0.126206	0.108709	0.245662	-0.158532	0.0770625	0.0396684	0.253487	0.38001	0.504742	0.343795	0.251121	0.170981	0.139849	0.0849044	0.0995219	-0.0216946
17	47060322	rs35895680	GIP-TTLL6	C	A	0.677	1.05 (1.04-1.06)	5.4e-14	2.3e-14	-0.0204076	0.0343622	0.552656	0.364189	0.297921	0.221544	-0.03472	0.0343816	0.312703	-0.121713	0.0776532	0.117012	-0.0758308	0.111352	0.495896	-0.0503926	0.0341131	0.139788	0.0700705	0.0345708	0.0428202	0.0444504	0.0715099	0.534206	-0.0606152	0.0960419	0.527969	0.00628571	0.0699722	0.928419	-0.303587	0.35035	0.386205	0.21303	0.253642	0.400973	0.00269663	0.0759974	0.971699	0.0706135
17	62203128	rs57676627	ACE	T	C	0.139	1.06 (1.04-1.07)	5.4e-10	1.8e-10	0.102037	0.0444482	0.0218089	-0.198546	0.375579	0.597056	0.0917482	0.0444936	0.0393432	0.0794025	0.100184	0.42804	0.132133	0.140918	0.348411	0.0792842	0.0441725	0.0728382	0.0169173	0.0448262	0.705922	0.0727578	0.0920479	0.429246	0.118298	0.121855	0.331638	0.0497992	0.0907647	0.58326	0.49007	0.401878	0.222673	-0.846935	0.426462	0.0470381	-0.0655289	0.0976384	0.502129	0.134478
17	65643646	rs80320393	BPTF-PITPNC1	T	C	0.075	1.05 (1.03-1.07)	1.7e-06	1.9e-09	-0.0792853	0.0621558	0.202262	-1.67521	1.01554	0.099029	-0.0381168	0.0622234	0.54023	-0.132887	0.145655	0.361589	0.189504	0.193437	0.327239	-0.0565023	0.0617492	0.360297	0.0547615	0.0626117	0.381894	-0.0795163	0.130399	0.542	0.064776	0.173008	0.708115	0.194102	0.127655	0.128373	-0.302992	0.746103	0.684669	-0.237461	0.474694	0.616907	-0.221447	0.133737	0.0977536	-0.238328
17	65957568	rs9899520	BPTF-PITPNC1	A	G	0.203	1.04 (1.03-1.05)	3.2e-10	9.8e-15	-0.0222516	0.0401862	0.579843	-0.237652	0.34839	0.495148	0.0271494	0.0402146	0.499688	-0.00638937	0.091459	0.944301	-0.0818882	0.133639	0.540037	-0.0059482	0.0399179	0.881561	-0.0235665	0.0404711	0.560433	-0.0518492	0.0836799	0.535511	-0.022172	0.113327	0.844884	0.074495	0.0819985	0.363615	0.208972	0.406718	0.607391	-0.0487765	0.289765	0.866322	0.0174567	0.0891338	0.844708	-0.0344051
17	76792179	rs1044486	CYTH1	G	A	0.461	1.04 (1.03-1.05)	1.4e-12	3.2e-13	-0.007595	0.0322329	0.813747	0.251296	0.253947	0.322389	0.0302609	0.0322497	0.348198	0.029015	0.0734211	0.692671	-0.102108	0.106412	0.33728	0.0426382	0.0320002	0.182883	-0.0285956	0.0324553	0.378392	0.00423104	0.0668991	0.949529	-0.13439	0.0911929	0.140565	0.0927068	0.0657264	0.158396	-0.351436	0.349194	0.314212	-0.0581663	0.225926	0.796827	0.0588442	0.0713941	0.40985	-0.0117568
18	7076836	rs9948462	LAMA1	T	C	0.369	1.04 (1.03-1.05)	5.8e-13	3.9e-15	0.0282876	0.0346878	0.414896	-0.196643	0.283645	0.488139	0.0156077	0.034718	0.653083	-0.0892094	0.0795738	0.262251	0.0414586	0.113648	0.715262	0.0240134	0.0344551	0.485925	0.00124497	0.0349403	0.97158	0.00917776	0.0720744	0.898707	-0.0299264	0.0981349	0.760402	0.078016	0.070731	0.270039	0.530387	0.35791	0.138368	0.296022	0.238578	0.214687	0.0114047	0.0767139	0.881806	-0.0438829
18	53050646	rs72926932	TCF4	C	A	0.084	1.07 (1.05-1.10)	9.6e-10	1.2e-09	0.00529934	0.062535	0.932476	0.512919	0.406253	0.206748	-0.123203	0.0625156	0.0489018	-0.0240212	0.142232	0.865887	0.209742	0.189547	0.268492	-0.052614	0.0621006	0.396972	-0.0183124	0.0629775	0.771255	-0.0613266	0.130118	0.637413	0.0283736	0.17293	0.869652	-0.0765021	0.127195	0.54754	0.18168	0.602615	0.763039	0.191537	0.398068	0.630396	0.0565126	0.140363	0.68724	-0.207943
18	56876430	rs9957320	GRP-MC4R	G	T	0.828	1.05 (1.03-1.06)	2.6e-12	2.3e-12	0.0691179	0.0444891	0.120454	0.0930708	0.371301	0.802075	0.0395888	0.0445419	0.374228	0.1405	0.103468	0.174491	0.265431	0.156436	0.0897442	0.051534	0.0442013	0.243808	0.0481749	0.0448202	0.282584	0.0253383	0.0924864	0.784112	0.0620807	0.126218	0.622823	-0.0681071	0.0908843	0.453626	0.454064	0.542547	0.402642	-0.101084	0.308198	0.742912	0.0698164	0.0979021	0.47577	0.0758222
18	57829135	rs6567160	GRP-MC4R	C	T	0.235	1.07 (1.06-1.08)	7.1e-29	1.3e-37	0.0776993	0.0377398	0.0396526	0.0928617	0.305937	0.761487	0.0819019	0.0377631	0.0302235	0.140492	0.085139	0.0989022	-0.287965	0.133115	0.0305195	0.0714782	0.037491	0.0567358	-0.0341572	0.0380432	0.369381	-0.0150385	0.0784549	0.84799	-0.0910019	0.107953	0.399243	-0.113836	0.076921	0.138895	-1.57626	0.730375	0.0309155	-0.00518944	0.277975	0.985105	0.129685	0.0846938	0.125711	-0.222931
18	58036384	rs76227980	GRP-MC4R	C	T	0.977	1.14 (1.10-1.18)	2.2e-13	3.1e-15	-0.188426	0.128731	0.143443	-0.752599	0.752878	0.31749	-0.0538211	0.128896	0.676323	-0.234859	0.280312	0.402116	-0.371598	0.372679	0.318714	-0.0662413	0.127927	0.604657	-0.172073	0.129659	0.184633	-0.255982	0.262993	0.330386	-0.0580802	0.353954	0.869669	-0.0340632	0.262576	0.896782	-0.596366	1.04503	0.568222	NA	NA	NA	-0.386044	0.310438	0.213663	0.406704
18	60845884	rs12454712	BCL2A	T	C	0.613	1.05 (1.04-1.06)	3.5e-19	4.1e-20	0.0154986	0.0343206	0.651624	0.323862	0.283508	0.253314	0.0377118	0.0343369	0.272222	-0.0733062	0.077695	0.345417	-0.0265738	0.111844	0.812162	0.0268022	0.034085	0.431773	-0.0443781	0.0345506	0.199152	-0.0662932	0.0711438	0.351413	-0.0307426	0.096094	0.749029	-0.030471	0.0699231	0.663018	-0.261956	0.348107	0.451734	-0.10598	0.234759	0.651657	-0.0198222	0.0761319	0.794584	0.0164475
18	74555593	rs12457906	ZNF236	G	A	0.391	1.04 (1.03-1.05)	8.9e-13	6e-13	-0.0114868	0.0331062	0.728654	0.0301023	0.267502	0.910406	-0.0841986	0.0330736	0.0109841	-0.00231468	0.0753105	0.975484	0.014997	0.10837	0.889902	-0.0764243	0.0328352	0.0200463	0.0557585	0.0333168	0.0943829	0.00495769	0.0686365	0.942474	0.0833296	0.0921823	0.366021	-0.0281094	0.0674308	0.676781	0.64433	0.343564	0.0607334	-0.1222	0.23729	0.606566	0.0762664	0.0736362	0.300319	0.0112861
19	4951064	rs262549	UHRF1-PTPRS	G	C	0.193	1.05 (1.03-1.06)	8.1e-10	2.5e-09	0.00193949	0.040682	0.961981	0.471384	0.288365	0.102116	-0.00607788	0.0407122	0.881342	-0.175506	0.0951305	0.0650525	-0.151503	0.139222	0.276502	-0.0112043	0.0404064	0.781589	-0.0460784	0.0409567	0.260715	-0.0682232	0.084701	0.420557	0.112292	0.11171	0.31479	-0.0621648	0.0828052	0.452813	-0.124667	0.445916	0.779804	-0.00620924	0.292234	0.983048	0.0761274	0.0909357	0.402513	0.0961462
19	7968168	rs2115107	MAP2K7	A	G	0.39	1.05 (1.04-1.06)	6.6e-18	1.1e-18	0.0118896	0.0333708	0.721667	0.144057	0.265069	0.586806	0.0363018	0.0333861	0.277033	0.0866271	0.0757221	0.252629	0.0237751	0.109017	0.827361	0.0270735	0.0331406	0.414075	-0.0300952	0.0336015	0.370557	0.0546113	0.0692689	0.430446	-0.052787	0.0941246	0.57492	-0.00996852	0.0679719	0.8834	-0.435499	0.378294	0.249643	-0.363259	0.247226	0.141741	-0.155561	0.0736382	0.0346428	-0.12329
19	12509536	rs4804181	FARSA-ZNF799	A	C	0.783	1.04 (1.03-1.05)	6.1e-10	6.8e-10	-0.0335323	0.0381705	0.379795	0.128673	0.31244	0.68046	-0.0480768	0.0381905	0.208239	-0.214652	0.0849319	0.011493	-0.0394226	0.123141	0.748848	-0.0411385	0.0379085	0.277974	0.00767908	0.0384491	0.841721	-0.0183506	0.0790568	0.816404	-0.0693395	0.105593	0.51142	-0.0686581	0.0778908	0.378048	-0.225134	0.378734	0.552216	0.405036	0.301353	0.17893	-0.038634	0.0850259	0.649589	-0.063782
19	13038415	rs3111316	FARSA-ZNF799	A	G	0.592	1.04 (1.03-1.05)	1.3e-12	6e-14	-0.0258792	0.0328605	0.431064	0.248733	0.269895	0.35674	0.0344542	0.0328808	0.294845	-0.0593626	0.0746054	0.426212	-0.0835504	0.107104	0.435341	0.00416469	0.032644	0.898496	-0.0361513	0.0330886	0.27473	-0.184993	0.0682927	0.00675144	0.00744464	0.092023	0.935519	0.00615591	0.0669477	0.92674	0.0527586	0.34481	0.878392	-0.0638852	0.230067	0.781253	0.0239946	0.0728143	0.741754	-0.171614
19	19379549	rs58542926	CILP2-TM6SF2	T	C	0.075	1.07 (1.05-1.09)	5e-12	1.6e-13	0.074013	0.0665631	0.266317	-0.0260935	0.535255	0.961119	0.0576293	0.0666215	0.387138	0.163181	0.148409	0.271544	-0.0481099	0.22363	0.829666	0.111041	0.0660849	0.0930721	-0.0368081	0.0670526	0.583111	0.0474464	0.138133	0.731217	-0.146841	0.197465	0.4571	-0.0895254	0.135418	0.508546	-0.833665	1.03247	0.41941	-0.0358282	0.481867	0.94073	0.0735757	0.148276	0.619732	-0.148717
19	22100706	rs142395395	ZNF257	A	G	1	1.23 (1.17-1.30)	3.6e-15	1.2e-15	NA	NA	NA	NA	NA	NA	NA	NA	NA	NA	NA	NA	NA	NA	NA	NA	NA	NA	NA	NA	NA	NA	NA	NA	NA	NA	NA	NA	NA	NA	NA	NA	NA	NA	NA	NA	NA	NA	NA	NA
19	33890838	rs10406327	PEPD	C	G	0.523	1.04 (1.03-1.05)	5.2e-18	3.5e-20	0.0223808	0.0321727	0.486738	0.382968	0.268388	0.153603	0.0518384	0.0321782	0.107357	0.0902617	0.0733337	0.218386	0.00509496	0.105033	0.961312	0.0483684	0.0319397	0.130105	-0.0248196	0.0324002	0.443755	-0.0564843	0.0667083	0.397111	0.0619594	0.0902914	0.492573	0.0166346	0.0655311	0.799617	0.318859	0.349068	0.361002	0.5575	0.240754	0.0205781	0.0638049	0.0712617	0.370598	0.098876
19	45326768	rs1871045	TOMM40-APOE-GIPR	T	C	0.372	1.03 (1.02-1.04)	5.1e-10	1.9e-11	-0.0407065	0.0331266	0.219298	-0.426302	0.285512	0.135407	-0.0251827	0.0331597	0.447689	-0.0540539	0.0754996	0.474024	0.0110092	0.107977	0.918788	-0.0569408	0.0328895	0.0835712	0.0174802	0.033373	0.600493	-0.0883177	0.0689245	0.200065	0.0485044	0.0924671	0.599894	-0.0559853	0.0674994	0.406864	0.376235	0.3378	0.26537	0.207445	0.227554	0.361956	-0.00152717	0.0734495	0.983413	0.0769333
19	45411941	rs429358	TOMM40-APOE-GIPR	T	C	0.847	1.06 (1.04-1.08)	6.8e-14	4.3e-15	-0.0129042	0.0563975	0.819044	-0.370542	0.365227	0.310318	0.00801614	0.05644	0.887072	0.0963898	0.129778	0.457647	0.0117407	0.183922	0.949101	0.0336374	0.0560118	0.54822	-0.0162694	0.0567973	0.774568	-0.116226	0.116557	0.31869	-0.00745216	0.159933	0.962826	0.0197518	0.114763	0.863353	-0.183513	0.554855	0.740844	0.316442	0.412945	0.443493	0.0914894	0.123514	0.458862	-0.0223288
19	46157019	rs10406431	TOMM40-APOE-GIPR	A	G	0.563	1.05 (1.04-1.06)	4.8e-23	6.6e-30	-0.0206825	0.0325228	0.524895	0.54809	0.279578	0.0499467	-0.0392619	0.0325377	0.22772	0.132976	0.0744313	0.0740078	0.0278081	0.106744	0.794472	-0.0514066	0.0322844	0.111488	0.0646563	0.0327224	0.0483155	0.0430745	0.067592	0.523948	0.117371	0.0918399	0.201248	-0.0457379	0.0662757	0.490122	0.409264	0.360673	0.256492	0.191107	0.234984	0.41606	0.016959	0.0719508	0.813663	0.0675981
19	46178661	rs2238689	TOMM40-APOE-GIPR	C	T	0.421	1.04 (1.03-1.05)	1.4e-11	2.1e-12	-0.0398784	0.0328461	0.224866	0.541103	0.263612	0.0401066	-0.109912	0.0327835	0.000816689	-0.0209979	0.0748678	0.779125	-0.0167048	0.108041	0.877126	-0.0872806	0.0325737	0.00743944	0.0395451	0.0330796	0.232065	0.157687	0.0683153	0.0209842	0.00662799	0.0922547	0.94273	-0.079513	0.0669647	0.235072	0.601575	0.347684	0.0835891	-0.125573	0.233397	0.590561	-0.0343886	0.0727109	0.636251	0.0471507
19	47569003	rs3810291	ZC3H4	A	G	0.672	1.05 (1.04-1.06)	8.2e-18	8.6e-19	0.0224584	0.0341848	0.511283	-0.0815984	0.271129	0.763457	-0.020271	0.0342111	0.55357	0.101141	0.0782869	0.196383	-0.00482832	0.111419	0.965414	0.0134502	0.0339565	0.692077	0.030175	0.0344243	0.380841	0.11459	0.071223	0.107643	-0.181805	0.0942058	0.0536245	-0.0657222	0.0697291	0.345934	0.0503842	0.36525	0.890284	-0.111515	0.237417	0.638577	-0.0231304	0.0758871	0.760538	-0.0324285
20	22427370	rs2181063	FOXA2	C	G	0.798	1.03 (1.02-1.05)	8.9e-10	5.9e-10	0.0402403	0.03978	0.311877	0.0793116	0.319582	0.804001	0.0343302	0.0398127	0.388639	-0.0132617	0.0903557	0.883347	-0.000439903	0.129861	0.997325	0.0657988	0.0394925	0.095862	-0.0408154	0.0400622	0.308433	-0.140805	0.0822584	0.0869361	0.0947141	0.114402	0.407725	0.0916516	0.0809905	0.257787	0.21784	0.447949	0.626751	0.238092	0.294072	0.418147	0.0203211	0.0878836	0.817139	0.135855
20	32674967	rs4911405	RALY	T	C	0.671	1.04 (1.03-1.05)	3.2e-10	4.4e-12	0.0160115	0.0353305	0.650465	0.0870896	0.291067	0.764782	0.0402664	0.0353463	0.254771	0.10302	0.0812511	0.204827	-0.134662	0.113905	0.237119	0.0114192	0.0350928	0.744917	-0.0120179	0.0355822	0.73559	0.0395353	0.0734477	0.590389	0.0301149	0.0993989	0.76191	0.0148294	0.0719556	0.836722	-0.0567583	0.368112	0.87747	-0.0409404	0.248979	0.869382	0.0491955	0.0780025	0.528246	0.0440543
20	42994812	rs12625671	HNF4A	C	T	0.115	1.08 (1.07-1.09)	2.1e-31	7e-43	-0.0515357	0.0504912	0.307537	-0.276366	0.435762	0.525941	0.0100041	0.0505426	0.843119	-0.173819	0.118401	0.142087	0.339959	0.151849	0.0251699	-0.0340743	0.050158	0.497009	0.068517	0.0508388	0.177911	-0.0315185	0.105021	0.764089	-0.075915	0.144903	0.600346	-0.0987358	0.102742	0.336549	0.992066	0.406273	0.0146113	0.00907866	0.346674	0.979112	0.204385	0.115598	0.07705	0.189041
20	43042364	rs1800961	HNF4A	T	C	0.035	1.16 (1.12-1.19)	1.2e-21	1.5e-24	0.0369593	0.10242	0.718245	-0.310689	1.00752	0.757801	0.10524	0.10247	0.304541	-0.171872	0.245841	0.48448	0.430164	0.293061	0.142147	0.0995246	0.101705	0.327926	-0.000802344	0.10315	0.993795	0.0457952	0.213266	0.829972	0.0814233	0.283829	0.774211	0.110826	0.209499	0.596793	NA	NA	NA	0.87177	0.518051	0.0924167	0.202818	0.234335	0.386767	0.279123
20	45596378	rs6063046	EYA2	A	G	0.727	1.04 (1.03-1.06)	7.7e-11	1.5e-10	0.026598	0.0366043	0.467541	1.01393	0.404285	0.0121435	0.0429563	0.0366232	0.240978	-0.0418423	0.0829342	0.613881	0.0546188	0.120714	0.650935	0.034653	0.0363533	0.340601	0.00466583	0.0368693	0.89931	-0.0425038	0.0759234	0.575633	0.0917557	0.104442	0.379658	0.126063	0.0745721	0.090934	0.149287	0.405723	0.712908	-0.454262	0.240648	0.0590717	0.0495264	0.0806969	0.539391	0.105314
20	48832020	rs6091115	CEBPB	T	C	0.535	1.05 (1.04-1.06)	7.8e-22	9.3e-23	0.00117932	0.033241	0.971703	-0.0718741	0.266259	0.787216	-0.00329246	0.0332657	0.921169	-0.163419	0.0758437	0.0311869	-0.0152334	0.109204	0.889084	0.0128638	0.0330151	0.696853	-0.0264997	0.0334712	0.428628	0.0501077	0.0690985	0.468349	0.0601248	0.0939382	0.522144	-0.0706914	0.06772	0.296571	-0.151587	0.358661	0.672558	-0.04095	0.23649	0.862533	0.0255978	0.073397	0.727273	0.033836
20	57387352	rs736266	GNAS	T	A	0.519	1.03 (1.02-1.04)	6.8e-10	6.6e-10	0.0824542	0.0332726	0.0132963	0.194818	0.269137	0.469146	0.00935766	0.0333524	0.779072	0.150341	0.0758709	0.0475366	0.0805564	0.108511	0.457881	0.0472857	0.0330847	0.153108	0.00130634	0.0335648	0.968958	0.0200183	0.0691333	0.772102	-0.0982426	0.0933508	0.292615	-0.032265	0.0678852	0.634577	-0.281831	0.356231	0.428859	-0.137716	0.234833	0.557578	0.0320896	0.0739203	0.664161	-0.0327691
22	30205572	rs36575	MTMR3-ZNRF3	C	T	0.913	1.08 (1.06-1.11)	2e-13	1.9e-13	-0.00581578	0.0621657	0.925475	-0.735641	0.389252	0.0587731	0.0369659	0.0622062	0.55242	0.011158	0.141787	0.937274	0.00520854	0.203671	0.979597	0.0290269	0.0617422	0.638318	-0.0791886	0.0625798	0.205888	0.0795812	0.129916	0.540167	-0.344497	0.160678	0.0320293	-0.105279	0.127048	0.407314	-0.534034	0.553102	0.334282	-0.0592024	0.430633	0.890645	0.000832346	0.137481	0.995172	-0.175524
22	32203334	rs75307421	YWHAH	A	G	0.018	1.10 (1.07-1.14)	1.2e-09	3.1e-11	-0.158261	0.115147	0.169478	NA	NA	NA	-0.0107775	0.115292	0.925532	-0.201493	0.271715	0.458353	-0.248434	0.406303	0.5409	-0.0262591	0.114427	0.818518	-0.0630456	0.116015	0.586902	-0.0525815	0.239625	0.826315	0.353379	0.290947	0.224527	0.0768777	0.235264	0.743853	1.14918	0.768844	0.134998	-0.554059	1.02504	0.588835	-0.239264	0.24635	0.33143	-0.425828
22	44324730	rs738408	PNPLA3	T	C	0.226	1.03 (1.02-1.04)	1.6e-08	5.5e-10	-0.000410799	0.0391672	0.991633	-0.826466	0.406038	0.0418067	0.0537372	0.0391764	0.170333	-0.037759	0.0897899	0.6741	-0.0779259	0.131566	0.553656	0.0330829	0.038895	0.395119	-0.0317109	0.0394383	0.421464	-0.0580911	0.0816289	0.476681	0.0796057	0.108867	0.464626	0.0345367	0.0798205	0.665277	-0.322233	0.45499	0.478808	0.12972	0.270878	0.632021	-0.194446	0.0852349	0.0225315	0.0329898
22	50356302	rs28691713	PIM3	C	T	0.517	1.05 (1.04-1.06)	2.1e-19	5.9e-22	-0.0347657	0.0328272	0.289716	-0.134977	0.263648	0.608684	0.0161526	0.0328596	0.623087	-0.0179578	0.0747799	0.810196	-0.0871314	0.107642	0.41823	-0.00249156	0.0326154	0.939115	0.00661417	0.03307	0.841499	0.138697	0.0683736	0.0425083	0.108517	0.0927133	0.241818	0.000901406	0.0668751	0.989243	-0.0175747	0.35083	0.960046	-0.192866	0.23261	0.40702	-0.0557942	0.072675	0.442668	-0.057004
[truncated: 2 more columns]
